# Supplementary material for: Intra-molecular origin of the spin-phonon coupling in slow-relaxing molecular magnets
Source: Chem Sci. 2017 Jul 31;8(9):6051–9. doi: 10.1039/c7sc02832f (PMC5625570; doi:10.1039/c7sc02832f)
Supplement: Supplementary file 1 [file SC-008-C7SC02832F-s001.dat]

## Displacement Atom 1 Coordinate 1 (Angstrom), D11 , D12 , D13 , D22 , D23 , D33 
0.002500  18.096558  1.425894  8.306132 19.056675  -5.182535  -7.505028 
0.002000  18.051114  1.427585  8.312349 19.040298  -5.174969  -7.479850 
0.001500  18.003761  1.429682  8.317483 19.022592  -5.166828  -7.453907 
0.001000  17.956809  1.432177  8.322420 19.004738  -5.158624  -7.428139 
0.000750  17.933019  1.433572  8.324640 18.995509  -5.154394  -7.415129 
0.000000  17.858237  1.438637  8.329163 18.964931  -5.140769  -7.374621 
-0.000750  17.786210  1.443999  8.334611 18.935942  -5.127263  -7.335402 
-0.001000  17.761120  1.446074  8.335739 18.925326  -5.122458  -7.321855 
-0.001500  17.710449  1.450506  8.337559 18.903509  -5.112612  -7.294551 
-0.002000  17.657940  1.455361  8.338310 18.880242  -5.102150  -7.266492 
-0.002500  17.605746  1.460553  8.338874 18.856697  -5.091610  -7.238537 
## Displacement Atom 1 Coordinate 2 (Angstrom), D11 , D12 , D13 , D22 , D23 , D33 
0.002500  17.568657  1.495325  8.163579 18.717032  -5.175304  -7.218047 
0.002000  17.628311  1.484618  8.197245 18.766965  -5.168762  -7.249748 
0.001500  17.688027  1.473461  8.231129 18.817439  -5.162179  -7.281688 
0.001000  17.746193  1.462109  8.264370 18.867171  -5.155326  -7.313101 
0.000750  17.775024  1.456303  8.280928 18.892034  -5.151848  -7.328769 
0.000000  17.858237  1.438637  8.329163 18.964931  -5.140769  -7.374621 
-0.000750  17.944199  1.419560  8.379283 19.041224  -5.130243  -7.422192 
-0.001000  17.971710  1.413108  8.395491 19.066094  -5.126519  -7.437652 
-0.001500  18.026092  1.399912  8.427729 19.115844  -5.118964  -7.468467 
-0.002000  18.080427  1.386092  8.460194 19.166410  -5.111401  -7.499580 
-0.002500  18.133133  1.372028  8.491998 19.216382  -5.103585  -7.530180 
## Displacement Atom 1 Coordinate 3 (Angstrom), D11 , D12 , D13 , D22 , D23 , D33 
0.002500  17.943921  1.425564  8.339377 19.002629  -5.146203  -7.421571 
0.002000  17.927290  1.428060  8.337626 18.995566  -5.145235  -7.412419 
0.001500  17.910444  1.430576  8.335821 18.988258  -5.144180  -7.403157 
0.001000  17.893810  1.433136  8.334018 18.981114  -5.143202  -7.393995 
0.000750  17.883094  1.434269  8.331574 18.975752  -5.141563  -7.388742 
0.000000  17.858237  1.438637  8.329163 18.964931  -5.140769  -7.374621 
-0.000750  17.834023  1.443078  8.327160 18.954512  -5.140254  -7.360670 
-0.001000  17.826443  1.444372  8.326623 18.951376  -5.139971  -7.356362 
-0.001500  17.810263  1.446368  8.324602 18.944421  -5.138088  -7.347930 
-0.002000  17.793281  1.449075  8.322653 18.936696  -5.136939  -7.338562 
-0.002500  17.776422  1.451826  8.320669 18.929052  -5.135840  -7.329255 
## Displacement Atom 2 Coordinate 1 (Angstrom), D11 , D12 , D13 , D22 , D23 , D33 
0.002500  17.767215  1.446091  8.294668 18.906698  -5.119165  -7.334344 
0.002000  17.785893  1.444508  8.301830 18.918744  -5.123595  -7.342603 
0.001500  17.809259  1.442522  8.311355 18.933586  -5.128410  -7.352889 
0.001000  17.825602  1.441200  8.317324 18.944075  -5.132526  -7.360141 
0.000750  17.834290  1.440757  8.320728 18.949434  -5.134620  -7.363833 
0.000000  17.858237  1.438637  8.329163 18.964931  -5.140769  -7.374621 
-0.000750  17.883011  1.436722  8.338200 18.980755  -5.146999  -7.385608 
-0.001000  17.891213  1.436097  8.341173 18.985977  -5.149059  -7.389249 
-0.001500  17.907744  1.434820  8.347198 18.996519  -5.153179  -7.396598 
-0.002000  17.935242  1.432405  8.358812 19.014349  -5.158699  -7.408788 
-0.002500  17.953897  1.430965  8.365893 19.026201  -5.163044  -7.417073 
## Displacement Atom 2 Coordinate 2 (Angstrom), D11 , D12 , D13 , D22 , D23 , D33 
0.002500  17.942883  1.432222  8.363733 19.016255  -5.170983  -7.408092 
0.002000  17.926021  1.433529  8.356845 19.006015  -5.164933  -7.401411 
0.001500  17.909148  1.434821  8.349957 18.995780  -5.158891  -7.394733 
0.001000  17.892487  1.436045  8.343248 18.985764  -5.152900  -7.388153 
0.000750  17.883969  1.436694  8.339751 18.980585  -5.149873  -7.384786 
0.000000  17.858237  1.438637  8.329163 18.964931  -5.140769  -7.374621 
-0.000750  17.832638  1.440358  8.318471 18.949535  -5.131726  -7.364660 
-0.001000  17.824266  1.441136  8.315273 18.944369  -5.128745  -7.361231 
-0.001500  17.807727  1.442268  8.308654 18.934508  -5.122823  -7.354744 
-0.002000  17.790794  1.443459  8.301774 18.924317  -5.116841  -7.348093 
-0.002500  17.773854  1.444637  8.294895 18.914132  -5.110867  -7.341445 
## Displacement Atom 2 Coordinate 3 (Angstrom), D11 , D12 , D13 , D22 , D23 , D33 
0.002500  17.894994  1.436115  8.309833 18.973039  -5.156061  -7.396551 
0.002000  17.890716  1.435891  8.316846 18.974893  -5.153491  -7.393411 
0.001500  17.882611  1.436564  8.320266 18.972593  -5.150240  -7.388675 
0.001000  17.874160  1.437262  8.323516 18.970052  -5.146846  -7.383808 
0.000750  17.869863  1.437664  8.324825 18.968539  -5.145258  -7.381349 
0.000000  17.858237  1.438637  8.329163 18.964931  -5.140769  -7.374621 
-0.000750  17.846911  1.439581  8.333684 18.961553  -5.136354  -7.368008 
-0.001000  17.842756  1.439963  8.335070 18.960148  -5.134792  -7.365609 
-0.001500  17.834513  1.440634  8.338429 18.957763  -5.131442  -7.360824 
-0.002000  17.826790  1.441266  8.342040 18.955735  -5.128274  -7.356239 
-0.002500  0.000000  0.000000  0.000000 0.000000  0.000000  0.000000 
## Displacement Atom 3 Coordinate 1 (Angstrom), D11 , D12 , D13 , D22 , D23 , D33 
0.002500  17.810519  1.441182  8.298501 18.933314  -5.136382  -7.356319 
0.002000  17.820565  1.440570  8.304913 18.940050  -5.137380  -7.360202 
0.001500  17.828356  1.439742  8.310397 18.945889  -5.136507  -7.363669 
0.001000  17.838183  1.439349  8.316619 18.952195  -5.137876  -7.367275 
0.000750  17.843202  1.439129  8.319690 18.955394  -5.138559  -7.369156 
0.000000  17.858237  1.438637  8.329163 18.964931  -5.140769  -7.374621 
-0.000750  17.873602  1.438155  8.338812 18.974687  -5.143026  -7.380223 
-0.001000  17.878486  1.437988  8.341795 18.977760  -5.143659  -7.382049 
-0.001500  17.888534  1.437664  8.348081 18.984160  -5.145012  -7.385764 
-0.002000  17.900006  1.436464  8.355432 18.992712  -5.144749  -7.390904 
-0.002500  17.909813  1.436052  8.361646 18.999140  -5.145592  -7.394695 
## Displacement Atom 3 Coordinate 2 (Angstrom), D11 , D12 , D13 , D22 , D23 , D33 
0.002500  17.857370  1.437576  8.340465 18.968920  -5.139727  -7.371347 
0.002000  17.858172  1.437710  8.338532 18.968586  -5.140064  -7.372277 
0.001500  17.859104  1.437904  8.336578 18.968309  -5.140350  -7.373271 
0.001000  17.859662  1.438040  8.334548 18.967820  -5.140656  -7.374098 
0.000750  17.859135  1.438226  8.332814 18.966810  -5.139830  -7.374385 
0.000000  17.858237  1.438637  8.329163 18.964931  -5.140769  -7.374621 
-0.000750  17.858120  1.438949  8.325942 18.963662  -5.141875  -7.375197 
-0.001000  17.861213  1.438645  8.326095 18.965433  -5.141711  -7.377130 
-0.001500  17.861397  1.438815  8.323884 18.964707  -5.141927  -7.377804 
-0.002000  17.862111  1.439018  8.321819 18.964323  -5.142152  -7.378726 
-0.002500  17.862258  1.439211  8.319560 18.963572  -5.142330  -7.379393 
## Displacement Atom 3 Coordinate 3 (Angstrom), D11 , D12 , D13 , D22 , D23 , D33 
0.002500  17.830066  1.426595  8.319629 18.970239  -5.099515  -7.379143 
0.002000  17.835888  1.428957  8.321662 18.969337  -5.107812  -7.378323 
0.001500  17.841652  1.431338  8.323652 18.968382  -5.116094  -7.377476 
0.001000  17.847242  1.433762  8.325533 18.967275  -5.124370  -7.376539 
0.000750  17.850101  1.435189  8.326412 18.966430  -5.129044  -7.375870 
0.000000  17.858237  1.438637  8.329163 18.964931  -5.140769  -7.374621 
-0.000750  17.866542  1.442094  8.331998 18.963549  -5.152532  -7.373433 
-0.001000  17.869617  1.443523  8.332954 18.962834  -5.157284  -7.372845 
-0.001500  17.875029  1.446014  8.334678 18.961566  -5.165476  -7.371837 
-0.002000  17.880381  1.448524  8.336357 18.960246  -5.173653  -7.370803 
-0.002500  17.885672  1.451052  8.337990 18.958874  -5.181814  -7.369741 
## Displacement Atom 4 Coordinate 1 (Angstrom), D11 , D12 , D13 , D22 , D23 , D33 
0.002500  17.872200  1.432009  8.312164 18.972935  -5.142336  -7.389924 
0.002000  17.861779  1.434519  8.317439 18.968299  -5.143070  -7.381532 
0.001500  17.861006  1.435537  8.320432 18.967536  -5.142522  -7.379850 
0.001000  17.859923  1.436545  8.323332 18.966627  -5.141909  -7.378038 
0.000750  17.859553  1.437062  8.324819 18.966241  -5.141636  -7.377205 
0.000000  17.858237  1.438637  8.329163 18.964931  -5.140769  -7.374621 
-0.000750  17.857150  1.440185  8.333650 18.963814  -5.139950  -7.372132 
-0.001000  17.856616  1.440675  8.335108 18.963388  -5.139633  -7.371240 
-0.001500  17.855608  1.441711  8.337993 18.962491  -5.139027  -7.369463 
-0.002000  17.854577  1.442750  8.340851 18.961572  -5.138410  -7.367682 
-0.002500  17.848415  1.444680  8.348342 18.960192  -5.139934  -7.361202 
## Displacement Atom 4 Coordinate 2 (Angstrom), D11 , D12 , D13 , D22 , D23 , D33 
0.002500  17.903342  1.431699  8.359367 19.002993  -5.154608  -7.392659 
0.002000  17.894489  1.433126  8.353415 18.995431  -5.151860  -7.389090 
0.001500  17.883609  1.434672  8.346189 18.986414  -5.148571  -7.384776 
0.001000  17.875120  1.436024  8.340520 18.979203  -5.145977  -7.381351 
0.000750  17.869409  1.436662  8.336753 18.974694  -5.144212  -7.379184 
0.000000  17.858237  1.438637  8.329163 18.964931  -5.140769  -7.374621 
-0.000750  17.847285  1.440528  8.321740 18.955433  -5.137395  -7.370172 
-0.001000  17.841371  1.441137  8.317891 18.950852  -5.135603  -7.367941 
-0.001500  17.831681  1.442505  8.311507 18.942868  -5.132753  -7.364093 
-0.002000  17.821345  1.443729  8.304817 18.934688  -5.129685  -7.360094 
-0.002500  17.811716  1.444972  8.298582 18.926951  -5.126860  -7.356311 
## Displacement Atom 4 Coordinate 3 (Angstrom), D11 , D12 , D13 , D22 , D23 , D33 
0.002500  17.794259  1.455271  8.319730 18.918994  -5.146519  -7.332308 
0.002000  17.808700  1.451666  8.321802 18.929253  -5.145284  -7.341794 
0.001500  17.821832  1.448309  8.323731 18.938625  -5.144139  -7.350442 
0.001000  17.835721  1.444912  8.326083 18.948488  -5.143257  -7.359363 
0.000750  17.841018  1.443307  8.326643 18.952425  -5.142496  -7.363095 
0.000000  17.858237  1.438637  8.329163 18.964931  -5.140769  -7.374621 
-0.000750  17.875676  1.433902  8.331840 18.977672  -5.139093  -7.386253 
-0.001000  17.881427  1.432322  8.332701 18.981885  -5.138522  -7.390109 
-0.001500  17.894996  1.428738  8.334883 18.991780  -5.137467  -7.399035 
-0.002000  17.908271  1.425204  8.336948 19.001483  -5.136340  -7.407826 
-0.002500  17.923623  1.421207  8.339352 19.012726  -5.135115  -7.417944 
## Displacement Atom 5 Coordinate 1 (Angstrom), D11 , D12 , D13 , D22 , D23 , D33 
0.002500  17.830802  1.449786  8.436508 18.989259  -5.134034  -7.331576 
0.002000  17.836391  1.447564  8.415072 18.984407  -5.135394  -7.340261 
0.001500  17.841940  1.445303  8.393260 18.979434  -5.136745  -7.349015 
0.001000  17.847452  1.443082  8.371928 18.974629  -5.138100  -7.357599 
0.000750  17.849999  1.442014  8.361588 18.972257  -5.138730  -7.361690 
0.000000  17.858237  1.438637  8.329163 18.964931  -5.140769  -7.374621 
-0.000750  17.866859  1.435193  8.296992 18.957973  -5.142901  -7.387674 
-0.001000  17.869203  1.434135  8.286568 18.955505  -5.143497  -7.391647 
-0.001500  17.874569  1.431882  8.265220 18.950748  -5.144841  -7.400087 
-0.002000  17.880027  1.429559  8.243435 18.945929  -5.146199  -7.408688 
-0.002500  17.885350  1.427280  8.221965 18.941162  -5.147542  -7.417111 
## Displacement Atom 5 Coordinate 2 (Angstrom), D11 , D12 , D13 , D22 , D23 , D33 
0.002500  17.908827  1.409563  8.353968 19.033408  -5.057391  -7.432361 
0.002000  17.895876  1.414595  8.348472 19.019629  -5.071534  -7.420509 
0.001500  17.886490  1.420597  8.343684 19.006019  -5.088892  -7.409078 
0.001000  17.877294  1.426446  8.339024 18.992713  -5.105826  -7.397874 
0.000750  17.872583  1.429486  8.336596 18.985820  -5.114585  -7.392091 
0.000000  17.858237  1.438637  8.329163 18.964931  -5.140769  -7.374621 
-0.000750  17.844357  1.447742  8.321966 18.944329  -5.166988  -7.357297 
-0.001000  17.839694  1.450652  8.319580 18.937613  -5.175274  -7.351664 
-0.001500  17.830362  1.456670  8.314728 18.923861  -5.192468  -7.340130 
-0.002000  17.822118  1.461531  8.311141 18.912671  -5.207862  -7.329981 
-0.002500  17.812460  1.467224  8.306463 18.899340  -5.224307  -7.318560 
## Displacement Atom 5 Coordinate 3 (Angstrom), D11 , D12 , D13 , D22 , D23 , D33 
0.002500  17.855807  1.448333  8.362906 18.975205  -5.158731  -7.357510 
0.002000  17.856743  1.446333  8.356380 18.973487  -5.155221  -7.361142 
0.001500  17.855843  1.444933  8.349153 18.970396  -5.151703  -7.363673 
0.001000  17.856707  1.442827  8.342523 18.968622  -5.148072  -7.367354 
0.000750  17.857139  1.441801  8.339306 18.967748  -5.146324  -7.369141 
0.000000  17.858237  1.438637  8.329163 18.964931  -5.140769  -7.374621 
-0.000750  17.859751  1.435426  8.319281 18.962443  -5.135303  -7.380265 
-0.001000  17.860056  1.434418  8.316005 18.961480  -5.133531  -7.381991 
-0.001500  17.860994  1.432319  8.309462 18.959789  -5.129930  -7.385674 
-0.002000  17.863867  1.430407  8.304244 18.959593  -5.127136  -7.389883 
-0.002500  17.864696  1.428424  8.297732 18.957831  -5.123617  -7.393431 
## Displacement Atom 6 Coordinate 1 (Angstrom), D11 , D12 , D13 , D22 , D23 , D33 
0.002500  17.846528  1.437175  8.330594 18.963352  -5.137159  -7.369725 
0.002000  17.848984  1.437488  8.330295 18.963673  -5.137948  -7.370740 
0.001500  17.851054  1.437797  8.329756 18.963756  -5.138629  -7.371628 
0.001000  17.853501  1.438071  8.329591 18.964187  -5.139357  -7.372645 
0.000750  17.855116  1.438198  8.329703 18.964645  -5.139816  -7.373306 
0.000000  17.858237  1.438637  8.329163 18.964931  -5.140769  -7.374621 
-0.000750  17.861829  1.439022  8.328893 18.965582  -5.141820  -7.376136 
-0.001000  17.863158  1.439192  8.328849 18.965826  -5.142221  -7.376671 
-0.001500  17.865539  1.439479  8.328643 18.966216  -5.142926  -7.377667 
-0.002000  17.867764  1.439770  8.328181 18.966431  -5.143619  -7.378636 
-0.002500  17.870186  1.440093  8.327849 18.966744  -5.144381  -7.379652 
## Displacement Atom 6 Coordinate 2 (Angstrom), D11 , D12 , D13 , D22 , D23 , D33 
0.002500  17.837894  1.444603  8.317314 18.944036  -5.142797  -7.362287 
0.002000  17.842086  1.443407  8.319746 18.948293  -5.142408  -7.364804 
0.001500  17.846797  1.442067  8.322510 18.953068  -5.141982  -7.367615 
0.001000  17.851367  1.440855  8.325163 18.957585  -5.141892  -7.370228 
0.000750  17.853492  1.440200  8.326418 18.959814  -5.141598  -7.371548 
0.000000  17.858237  1.438637  8.329163 18.964931  -5.140769  -7.374621 
-0.000750  17.863180  1.437049  8.332037 18.970215  -5.139997  -7.377771 
-0.001000  17.865522  1.436351  8.333410 18.972623  -5.139743  -7.379195 
-0.001500  17.870144  1.435096  8.336095 18.977226  -5.139674  -7.381849 
-0.002000  17.874947  1.433689  8.338920 18.982138  -5.139284  -7.384723 
-0.002500  17.878973  1.432456  8.341280 18.986344  -5.138892  -7.387188 
## Displacement Atom 6 Coordinate 3 (Angstrom), D11 , D12 , D13 , D22 , D23 , D33 
0.002500  17.890993  1.435051  8.348597 18.989286  -5.149544  -7.387653 
0.002000  17.884542  1.435760  8.344764 18.984489  -5.147771  -7.385095 
0.001500  17.877775  1.436480  8.340718 18.979473  -5.145837  -7.382450 
0.001000  17.871616  1.437159  8.337088 18.974905  -5.144183  -7.379993 
0.000750  17.867894  1.437542  8.334889 18.972171  -5.143128  -7.378537 
0.000000  17.858237  1.438637  8.329163 18.964931  -5.140769  -7.374621 
-0.000750  17.848720  1.439692  8.323481 18.957810  -5.138404  -7.370795 
-0.001000  17.845577  1.440057  8.321676 18.955475  -5.137684  -7.369492 
-0.001500  17.839192  1.440672  8.317911 18.950847  -5.135810  -7.367035 
-0.002000  17.832607  1.441319  8.313981 18.946028  -5.133926  -7.364494 
-0.002500  17.826132  1.441968  8.310156 18.941288  -5.132161  -7.361958 
## Displacement Atom 7 Coordinate 1 (Angstrom), D11 , D12 , D13 , D22 , D23 , D33 
0.002500  17.856608  1.438762  8.326415 18.962854  -5.139934  -7.374445 
0.002000  17.856996  1.438698  8.327066 18.963389  -5.140143  -7.374503 
0.001500  17.857332  1.438681  8.327606 18.963794  -5.140306  -7.374542 
0.001000  17.857864  1.438622  8.328252 18.964366  -5.140496  -7.374680 
0.000750  17.858040  1.438615  8.328526 18.964570  -5.140581  -7.374701 
0.000000  17.858237  1.438637  8.329163 18.964931  -5.140769  -7.374621 
-0.000750  17.859079  1.438577  8.330164 18.965785  -5.141089  -7.374819 
-0.001000  17.859251  1.438570  8.330436 18.965986  -5.141173  -7.374838 
-0.001500  17.859295  1.438582  8.330823 18.966191  -5.141272  -7.374755 
-0.002000  17.859613  1.438566  8.331355 18.966584  -5.141431  -7.374787 
-0.002500  17.860228  1.438468  8.332128 18.967296  -5.141674  -7.374950 
## Displacement Atom 7 Coordinate 2 (Angstrom), D11 , D12 , D13 , D22 , D23 , D33 
0.002500  17.882858  1.436276  8.342027 18.982362  -5.148242  -7.384514 
0.002000  17.878014  1.436744  8.339496 18.978930  -5.146761  -7.382567 
0.001500  17.871526  1.437367  8.336124 18.974344  -5.144745  -7.379965 
0.001000  17.868079  1.437715  8.334298 18.971866  -5.143728  -7.378568 
0.000750  17.865701  1.437936  8.333060 18.970193  -5.143004  -7.377616 
0.000000  17.858237  1.438637  8.329163 18.964931  -5.140769  -7.374621 
-0.000750  17.851405  1.439252  8.325626 18.960158  -5.138665  -7.371900 
-0.001000  17.849016  1.439470  8.324385 18.958484  -5.137942  -7.370945 
-0.001500  17.845162  1.439866  8.322347 18.955711  -5.136855  -7.369369 
-0.002000  17.839000  1.440413  8.319159 18.951407  -5.134901  -7.366929 
-0.002500  17.834092  1.440862  8.316608 18.947960  -5.133418  -7.364967 
## Displacement Atom 7 Coordinate 3 (Angstrom), D11 , D12 , D13 , D22 , D23 , D33 
0.002500  17.860718  1.437316  8.331673 18.969061  -5.139531  -7.376565 
0.002000  17.860310  1.437570  8.331219 18.968302  -5.139795  -7.376215 
0.001500  17.859384  1.437925  8.330462 18.967090  -5.140028  -7.375603 
0.001000  17.856903  1.438510  8.328836 18.964631  -5.139965  -7.374288 
0.000750  17.856991  1.438567  8.328788 18.964522  -5.140084  -7.374272 
0.000000  17.858237  1.438637  8.329163 18.964931  -5.140769  -7.374621 
-0.000750  17.860185  1.438618  8.329931 18.965874  -5.141597  -7.375273 
-0.001000  17.859779  1.438745  8.329622 18.965395  -5.141624  -7.375034 
-0.001500  17.857673  1.439271  8.328189 18.963232  -5.141619  -7.373896 
-0.002000  17.857050  1.439579  8.327592 18.962256  -5.141909  -7.373423 
-0.002500  17.856648  1.439828  8.327142 18.961508  -5.142175  -7.373078 
## Displacement Atom 8 Coordinate 1 (Angstrom), D11 , D12 , D13 , D22 , D23 , D33 
0.002500  17.859094  1.438957  8.329349 18.964915  -5.141076  -7.374786 
0.002000  17.859286  1.438818  8.329511 18.965220  -5.141077  -7.374929 
0.001500  17.859141  1.438757  8.329488 18.965237  -5.141023  -7.374903 
0.001000  17.858360  1.438760  8.329163 18.964823  -5.140853  -7.374597 
0.000750  17.858553  1.438685  8.329287 18.965035  -5.140874  -7.374709 
0.000000  17.858237  1.438637  8.329163 18.964931  -5.140769  -7.374621 
-0.000750  17.858290  1.438547  8.329252 18.965106  -5.140750  -7.374685 
-0.001000  17.857935  1.438556  8.329094 18.964906  -5.140674  -7.374544 
-0.001500  17.858277  1.438391  8.329358 18.965344  -5.140699  -7.374753 
-0.002000  17.858133  1.438330  8.329336 18.965362  -5.140645  -7.374728 
-0.002500  17.857985  1.438269  8.329313 18.965379  -5.140590  -7.374702 
## Displacement Atom 8 Coordinate 2 (Angstrom), D11 , D12 , D13 , D22 , D23 , D33 
0.002500  17.865301  1.437942  8.332677 18.969813  -5.142432  -7.377597 
0.002000  17.863964  1.438071  8.332016 18.968894  -5.142114  -7.377034 
0.001500  17.862625  1.438201  8.331354 18.967973  -5.141797  -7.376471 
0.001000  17.860341  1.438442  8.330215 18.966374  -5.141269  -7.375497 
0.000750  17.859802  1.438495  8.329948 18.966004  -5.141144  -7.375270 
0.000000  17.858237  1.438637  8.329163 18.964931  -5.140769  -7.374621 
-0.000750  17.856568  1.438810  8.328347 18.963782  -5.140396  -7.373906 
-0.001000  17.856028  1.438862  8.328080 18.963411  -5.140271  -7.373679 
-0.001500  17.854593  1.438976  8.327387 18.962456  -5.139891  -7.373094 
-0.002000  17.853252  1.439105  8.326725 18.961535  -5.139573  -7.372530 
-0.002500  17.851910  1.439234  8.326063 18.960614  -5.139255  -7.371966 
## Displacement Atom 8 Coordinate 3 (Angstrom), D11 , D12 , D13 , D22 , D23 , D33 
0.002500  17.860612  1.438470  8.330293 18.966443  -5.141396  -7.375573 
0.002000  17.859602  1.438558  8.329812 18.965779  -5.141149  -7.375153 
0.001500  17.859247  1.438581  8.329646 18.965557  -5.141055  -7.375012 
0.001000  17.858893  1.438605  8.329480 18.965336  -5.140960  -7.374870 
0.000750  17.858999  1.438564  8.329549 18.965454  -5.140940  -7.374940 
0.000000  17.858237  1.438637  8.329163 18.964931  -5.140769  -7.374621 
-0.000750  17.857851  1.438666  8.328994 18.964692  -5.140685  -7.374458 
-0.001000  17.857468  1.438701  8.328811 18.964443  -5.140579  -7.374302 
-0.001500  17.857110  1.438725  8.328643 18.964219  -5.140483  -7.374159 
-0.002000  17.856978  1.438688  8.328618 18.964210  -5.140396  -7.374136 
-0.002500  17.856572  1.438713  8.328430 18.963960  -5.140284  -7.373975 
## Displacement Atom 9 Coordinate 1 (Angstrom), D11 , D12 , D13 , D22 , D23 , D33 
0.002500  17.837300  1.439716  8.331778 18.958214  -5.133846  -7.363994 
0.002000  17.841651  1.439497  8.331139 18.959553  -5.135344  -7.366204 
0.001500  17.845831  1.439277  8.330668 18.960927  -5.136709  -7.368322 
0.001000  17.850114  1.439047  8.330719 18.962585  -5.138056  -7.370389 
0.000750  17.852217  1.438936  8.330372 18.963227  -5.138750  -7.371478 
0.000000  17.858237  1.438637  8.329163 18.964931  -5.140769  -7.374621 
-0.000750  17.864813  1.438273  8.328267 18.967055  -5.142903  -7.378001 
-0.001000  17.866909  1.438165  8.327911 18.967689  -5.143593  -7.379087 
-0.001500  17.870829  1.437997  8.327754 18.969059  -5.144871  -7.380991 
-0.002000  17.874982  1.437790  8.327252 18.970396  -5.146227  -7.383097 
-0.002500  17.879505  1.437561  8.326694 18.971851  -5.147745  -7.385384 
## Displacement Atom 9 Coordinate 2 (Angstrom), D11 , D12 , D13 , D22 , D23 , D33 
0.002500  17.844629  1.437620  8.322333 18.958298  -5.138258  -7.369912 
0.002000  17.847554  1.437777  8.323831 18.959814  -5.138624  -7.370991 
0.001500  17.850273  1.437983  8.325193 18.961132  -5.139173  -7.371918 
0.001000  17.852238  1.438312  8.326105 18.961817  -5.139901  -7.372428 
0.000750  17.853821  1.438382  8.326917 18.962659  -5.140135  -7.373012 
0.000000  17.858237  1.438637  8.329163 18.964931  -5.140769  -7.374621 
-0.000750  17.863257  1.438823  8.331750 18.967659  -5.141524  -7.376488 
-0.001000  17.864820  1.438900  8.332549 18.968484  -5.141751  -7.377063 
-0.001500  17.866344  1.439301  8.333225 18.968834  -5.142392  -7.377376 
-0.002000  17.868982  1.439533  8.334540 18.970083  -5.142916  -7.378268 
-0.002500  17.871965  1.439703  8.336062 18.971632  -5.143279  -7.379374 
## Displacement Atom 9 Coordinate 3 (Angstrom), D11 , D12 , D13 , D22 , D23 , D33 
0.002500  17.879990  1.435724  8.310567 18.967908  -5.147818  -7.390323 
0.002000  17.875686  1.436302  8.314315 18.967346  -5.146419  -7.387203 
0.001500  17.870809  1.437001  8.318310 18.966549  -5.144865  -7.383693 
0.001000  17.867985  1.437376  8.322004 18.966731  -5.143824  -7.381400 
0.000750  17.865623  1.437682  8.323838 18.966338  -5.143076  -7.379737 
0.000000  17.858237  1.438637  8.329163 18.964931  -5.140769  -7.374621 
-0.000750  17.851457  1.439516  8.334833 18.963990  -5.138585  -7.369762 
-0.001000  17.849094  1.439822  8.336663 18.963598  -5.137835  -7.368098 
-0.001500  17.845916  1.440248  8.340156 18.963515  -5.136727  -7.365645 
-0.002000  17.841193  1.440922  8.344238 18.962849  -5.135193  -7.362200 
-0.002500  17.836875  1.441500  8.347970 18.962287  -5.133786  -7.359070 
## Displacement Atom 10 Coordinate 1 (Angstrom), D11 , D12 , D13 , D22 , D23 , D33 
0.002500  17.856313  1.438778  8.333732 18.965997  -5.139598  -7.372757 
0.002000  17.856676  1.438759  8.332210 18.965493  -5.139891  -7.373234 
0.001500  17.857054  1.438732  8.331445 18.965344  -5.140111  -7.373572 
0.001000  17.857703  1.438665  8.330676 18.965328  -5.140388  -7.374064 
0.000750  17.857884  1.438653  8.330325 18.965264  -5.140494  -7.374223 
0.000000  17.858237  1.438637  8.329163 18.964931  -5.140769  -7.374621 
-0.000750  17.858968  1.438577  8.328218 18.964883  -5.141131  -7.375175 
-0.001000  17.859149  1.438565  8.327867 18.964820  -5.141237  -7.375334 
-0.001500  17.859316  1.438572  8.326847 18.964440  -5.141430  -7.375604 
-0.002000  17.859693  1.438545  8.326079 18.964289  -5.141650  -7.375943 
-0.002500  17.860823  1.438411  8.324958 18.964368  -5.142077  -7.376771 
## Displacement Atom 10 Coordinate 2 (Angstrom), D11 , D12 , D13 , D22 , D23 , D33 
0.002500  17.860578  1.438891  8.330659 18.966107  -5.141467  -7.375252 
0.002000  17.859701  1.438876  8.330099 18.965573  -5.141237  -7.374967 
0.001500  17.859321  1.438820  8.329861 18.965402  -5.141120  -7.374872 
0.001000  17.859224  1.438711  8.329762 18.965455  -5.141005  -7.374925 
0.000750  17.859025  1.438687  8.329640 18.965361  -5.140957  -7.374869 
0.000000  17.858237  1.438637  8.329163 18.964931  -5.140769  -7.374621 
-0.000750  17.857834  1.438542  8.328907 18.964793  -5.140670  -7.374532 
-0.001000  17.857635  1.438518  8.328784 18.964698  -5.140622  -7.374476 
-0.001500  17.857023  1.438488  8.328420 18.964364  -5.140415  -7.374293 
-0.002000  17.856638  1.438433  8.328179 18.964189  -5.140297  -7.374195 
-0.002500  17.856618  1.438290  8.328070 18.964306  -5.140215  -7.374303 
## Displacement Atom 10 Coordinate 3 (Angstrom), D11 , D12 , D13 , D22 , D23 , D33 
0.002500  17.857551  1.438910  8.328811 18.964195  -5.140466  -7.374253 
0.002000  17.857507  1.438891  8.329013 18.964292  -5.140508  -7.374186 
0.001500  17.857778  1.438816  8.329099 18.964519  -5.140592  -7.374333 
0.001000  17.857695  1.438776  8.329030 18.964515  -5.140605  -7.374323 
0.000750  17.857813  1.438746  8.329058 18.964606  -5.140645  -7.374387 
0.000000  17.858237  1.438637  8.329163 18.964931  -5.140769  -7.374621 
-0.000750  17.858526  1.438563  8.329223 18.965157  -5.140889  -7.374775 
-0.001000  17.858644  1.438533  8.329250 18.965249  -5.140929  -7.374839 
-0.001500  17.859401  1.438367  8.329626 18.965884  -5.141088  -7.375213 
-0.002000  17.859672  1.438291  8.329716 18.966113  -5.141170  -7.375360 
-0.002500  17.859223  1.438331  8.329708 18.965909  -5.141138  -7.375109 
## Displacement Atom 11 Coordinate 1 (Angstrom), D11 , D12 , D13 , D22 , D23 , D33 
0.002500  17.858955  1.438651  8.329507 18.965214  -5.141284  -7.374775 
0.002000  17.858870  1.438641  8.329472 18.965203  -5.141193  -7.374769 
0.001500  17.858279  1.438686  8.329174 18.964831  -5.141016  -7.374541 
0.001000  17.858169  1.438694  8.329231 18.964824  -5.140997  -7.374474 
0.000750  17.858228  1.438674  8.329238 18.964883  -5.140950  -7.374528 
0.000000  17.858237  1.438637  8.329163 18.964931  -5.140769  -7.374621 
-0.000750  17.858584  1.438561  8.329284 18.965235  -5.140668  -7.374853 
-0.001000  17.858644  1.438542  8.329291 18.965294  -5.140621  -7.374907 
-0.001500  17.858144  1.438610  8.329149 18.964994  -5.140533  -7.374660 
-0.002000  17.858208  1.438559  8.329195 18.965119  -5.140470  -7.374730 
-0.002500  17.858127  1.438548  8.329161 18.965110  -5.140380  -7.374727 
## Displacement Atom 11 Coordinate 2 (Angstrom), D11 , D12 , D13 , D22 , D23 , D33 
0.002500  17.863084  1.438463  8.330694 18.967583  -5.141726  -7.376764 
0.002000  17.862971  1.438388  8.330783 18.967671  -5.141643  -7.376743 
0.001500  17.861862  1.438441  8.330421 18.967043  -5.141440  -7.376244 
0.001000  17.860155  1.438558  8.329851 18.966036  -5.141142  -7.375458 
0.000750  17.859663  1.438582  8.329675 18.965750  -5.141049  -7.375241 
0.000000  17.858237  1.438637  8.329163 18.964931  -5.140769  -7.374621 
-0.000750  17.856703  1.438723  8.328618 18.964032  -5.140490  -7.373934 
-0.001000  17.856210  1.438747  8.328442 18.963746  -5.140397  -7.373716 
-0.001500  17.855212  1.438759  8.328245 18.963277  -5.140222  -7.373255 
-0.002000  17.854103  1.438813  8.327882 18.962648  -5.140018  -7.372756 
-0.002500  17.853718  1.438777  8.327827 18.962532  -5.139885  -7.372612 
## Displacement Atom 11 Coordinate 3 (Angstrom), D11 , D12 , D13 , D22 , D23 , D33 
0.002500  17.863267  1.438416  8.330650 18.967676  -5.141622  -7.376924 
0.002000  17.862320  1.438453  8.330386 18.967173  -5.141464  -7.376488 
0.001500  17.860907  1.438538  8.329859 18.966332  -5.141223  -7.375856 
0.001000  17.860342  1.438544  8.329787 18.966086  -5.141134  -7.375584 
0.000750  17.859860  1.438562  8.329657 18.965830  -5.141053  -7.375361 
0.000000  17.858237  1.438637  8.329163 18.964931  -5.140769  -7.374621 
-0.000750  17.856965  1.438672  8.328872 18.964297  -5.140568  -7.374025 
-0.001000  17.856483  1.438691  8.328741 18.964041  -5.140487  -7.373803 
-0.001500  17.855489  1.438764  8.328449 18.963471  -5.140321  -7.373332 
-0.002000  17.854755  1.438749  8.328279 18.963146  -5.140197  -7.373011 
-0.002500  17.853810  1.438786  8.328015 18.962642  -5.140038  -7.372576 
## Displacement Atom 12 Coordinate 1 (Angstrom), D11 , D12 , D13 , D22 , D23 , D33 
0.002500  17.852556  1.439225  8.336635 18.964994  -5.132327  -7.371443 
0.002000  17.853706  1.439060  8.335259 18.965110  -5.133995  -7.372095 
0.001500  17.854607  1.438922  8.333835 18.965087  -5.135598  -7.372625 
0.001000  17.855352  1.438768  8.331952 18.964805  -5.137335  -7.373143 
0.000750  17.855863  1.438756  8.331558 18.964886  -5.137990  -7.373374 
0.000000  17.858237  1.438637  8.329163 18.964931  -5.140769  -7.374621 
-0.000750  17.861136  1.438453  8.327064 18.965376  -5.143660  -7.376091 
-0.001000  17.861360  1.438482  8.326508 18.965237  -5.144262  -7.376193 
-0.001500  17.862457  1.438274  8.324800 18.965227  -5.146054  -7.376878 
-0.002000  17.863473  1.438115  8.323415 18.965295  -5.147670  -7.377470 
-0.002500  17.864747  1.437926  8.322072 18.965506  -5.149356  -7.378189 
## Displacement Atom 12 Coordinate 2 (Angstrom), D11 , D12 , D13 , D22 , D23 , D33 
0.002500  17.840589  1.439917  8.333495 18.958867  -5.138408  -7.363934 
0.002000  17.844410  1.439617  8.332613 18.960232  -5.138949  -7.366240 
0.001500  17.848623  1.439272  8.331805 18.961822  -5.139580  -7.368741 
0.001000  17.851286  1.439111  8.330932 18.962609  -5.139835  -7.370415 
0.000750  17.853094  1.438983  8.330530 18.963244  -5.140084  -7.371497 
0.000000  17.858237  1.438637  8.329163 18.964931  -5.140769  -7.374621 
-0.000750  17.863940  1.438229  8.328113 18.967040  -5.141569  -7.377982 
-0.001000  17.864842  1.438209  8.327516 18.967145  -5.141606  -7.378615 
-0.001500  17.868086  1.438004  8.326654 18.968203  -5.142008  -7.380588 
-0.002000  17.872515  1.437650  8.325957 18.969941  -5.142669  -7.383183 
-0.002500  17.875808  1.437408  8.324991 18.971032  -5.143034  -7.385241 
## Displacement Atom 12 Coordinate 3 (Angstrom), D11 , D12 , D13 , D22 , D23 , D33 
0.002500  17.839076  1.435249  8.319216 18.958393  -5.135490  -7.369763 
0.002000  17.843237  1.436025  8.321386 18.959746  -5.136692  -7.370774 
0.001500  17.847483  1.436574  8.323511 18.961405  -5.137871  -7.371971 
0.001000  17.851443  1.437374  8.325493 18.962599  -5.139066  -7.372913 
0.000750  17.853772  1.437566  8.326562 18.963612  -5.139697  -7.373658 
0.000000  17.858237  1.438637  8.329163 18.964931  -5.140769  -7.374621 
-0.000750  17.863127  1.439666  8.332008 18.966584  -5.141919  -7.375769 
-0.001000  17.865047  1.439924  8.332857 18.967291  -5.142465  -7.376334 
-0.001500  17.869194  1.440718  8.334923 18.968644  -5.143650  -7.377383 
-0.002000  17.873358  1.441425  8.336995 18.970120  -5.144816  -7.378492 
-0.002500  17.877170  1.442183  8.338938 18.971367  -5.145838  -7.379456 
## Displacement Atom 13 Coordinate 1 (Angstrom), D11 , D12 , D13 , D22 , D23 , D33 
0.002500  17.839684  1.438492  8.318338 18.953612  -5.135412  -7.368384 
0.002000  17.843251  1.438557  8.320553 18.955806  -5.136517  -7.369515 
0.001500  17.847030  1.438571  8.322727 18.958117  -5.137589  -7.370805 
0.001000  17.850188  1.438553  8.324568 18.960090  -5.138455  -7.371898 
0.000750  17.852285  1.438563  8.325765 18.961365  -5.139051  -7.372615 
0.000000  17.858237  1.438637  8.329163 18.964931  -5.140769  -7.374621 
-0.000750  17.864863  1.438631  8.332937 18.969004  -5.142621  -7.376916 
-0.001000  17.866960  1.438645  8.334132 18.970275  -5.143216  -7.377633 
-0.001500  17.869741  1.438693  8.335768 18.971953  -5.144010  -7.378556 
-0.002000  17.873531  1.438720  8.337940 18.974255  -5.145078  -7.379849 
-0.002500  17.877167  1.438793  8.340184 18.976485  -5.146184  -7.381013 
## Displacement Atom 13 Coordinate 2 (Angstrom), D11 , D12 , D13 , D22 , D23 , D33 
0.002500  17.861507  1.438930  8.329990 18.966055  -5.142592  -7.375592 
0.002000  17.860868  1.438870  8.329835 18.965842  -5.142231  -7.375404 
0.001500  17.860232  1.438810  8.329682 18.965633  -5.141871  -7.375216 
0.001000  17.860071  1.438721  8.329778 18.965735  -5.141637  -7.375214 
0.000750  17.859695  1.438689  8.329671 18.965597  -5.141437  -7.375102 
0.000000  17.858237  1.438637  8.329163 18.964931  -5.140769  -7.374621 
-0.000750  17.857462  1.438499  8.329039 18.964785  -5.140240  -7.374434 
-0.001000  17.857093  1.438467  8.328936 18.964652  -5.140042  -7.374324 
-0.001500  17.856497  1.438444  8.328801 18.964424  -5.139731  -7.374124 
-0.002000  17.855888  1.438383  8.328661 18.964231  -5.139377  -7.373947 
-0.002500  17.855282  1.438321  8.328523 18.964041  -5.139025  -7.373772 
## Displacement Atom 13 Coordinate 3 (Angstrom), D11 , D12 , D13 , D22 , D23 , D33 
0.002500  17.833722  1.440650  8.317647 18.948612  -5.136081  -7.364056 
0.002000  17.838717  1.440234  8.320002 18.951949  -5.137036  -7.366209 
0.001500  17.845416  1.439689  8.323126 18.956396  -5.138344  -7.369092 
0.001000  17.851893  1.439205  8.326154 18.960649  -5.139635  -7.371850 
0.000750  17.854035  1.438980  8.327154 18.962124  -5.140007  -7.372808 
0.000000  17.858237  1.438637  8.329163 18.964931  -5.140769  -7.374621 
-0.000750  17.863147  1.438204  8.331568 18.968276  -5.141673  -7.376740 
-0.001000  17.864786  1.438052  8.332300 18.969373  -5.141954  -7.377471 
-0.001500  17.871798  1.437488  8.335610 18.974036  -5.143330  -7.380480 
-0.002000  17.878457  1.436951  8.338709 18.978453  -5.144622  -7.383353 
-0.002500  17.883395  1.436547  8.341030 18.981740  -5.145562  -7.385485 
## Displacement Atom 14 Coordinate 1 (Angstrom), D11 , D12 , D13 , D22 , D23 , D33 
0.002500  17.853565  1.438779  8.327084 18.962138  -5.139630  -7.372755 
0.002000  17.854573  1.438741  8.327541 18.962753  -5.139872  -7.373160 
0.001500  17.855582  1.438703  8.327998 18.963368  -5.140115  -7.373565 
0.001000  17.856598  1.438714  8.328442 18.963928  -5.140393  -7.373944 
0.000750  17.856994  1.438699  8.328618 18.964169  -5.140487  -7.374105 
0.000000  17.858237  1.438637  8.329163 18.964931  -5.140769  -7.374621 
-0.000750  17.859372  1.438606  8.329675 18.965614  -5.141053  -7.375069 
-0.001000  17.859768  1.438591  8.329851 18.965855  -5.141147  -7.375230 
-0.001500  17.861644  1.438475  8.330747 18.967065  -5.141574  -7.376002 
-0.002000  17.862659  1.438437  8.331207 18.967684  -5.141818  -7.376410 
-0.002500  17.863675  1.438400  8.331667 18.968302  -5.142062  -7.376819 
## Displacement Atom 14 Coordinate 2 (Angstrom), D11 , D12 , D13 , D22 , D23 , D33 
0.002500  17.855649  1.439032  8.327857 18.962854  -5.140148  -7.373430 
0.002000  17.856727  1.438888  8.328402 18.963672  -5.140397  -7.373912 
0.001500  17.857217  1.438811  8.328654 18.964073  -5.140512  -7.374138 
0.001000  17.857314  1.438781  8.328716 18.964202  -5.140561  -7.374188 
0.000750  17.857861  1.438699  8.328997 18.964625  -5.140679  -7.374437 
0.000000  17.858237  1.438637  8.329163 18.964931  -5.140769  -7.374621 
-0.000750  17.859005  1.438529  8.329555 18.965533  -5.140949  -7.374968 
-0.001000  17.859007  1.438531  8.329554 18.965547  -5.140970  -7.374966 
-0.001500  17.860175  1.438341  8.330179 18.966489  -5.141206  -7.375506 
-0.002000  17.860675  1.438262  8.330437 18.966897  -5.141323  -7.375737 
-0.002500  17.861104  1.438214  8.330638 18.967226  -5.141457  -7.375923 
## Displacement Atom 14 Coordinate 3 (Angstrom), D11 , D12 , D13 , D22 , D23 , D33 
0.002500  17.854746  1.438666  8.327640 18.962975  -5.139911  -7.373268 
0.002000  17.855433  1.438663  8.327942 18.963358  -5.140083  -7.373532 
0.001500  17.856121  1.438661  8.328243 18.963742  -5.140255  -7.373796 
0.001000  17.857028  1.438637  8.328682 18.964285  -5.140480  -7.374145 
0.000750  17.857377  1.438632  8.328829 18.964481  -5.140563  -7.374283 
0.000000  17.858237  1.438637  8.329163 18.964931  -5.140769  -7.374621 
-0.000750  17.859468  1.438599  8.329711 18.965661  -5.141061  -7.375112 
-0.001000  17.859816  1.438594  8.329858 18.965857  -5.141144  -7.375250 
-0.001500  17.860248  1.438645  8.330051 18.966042  -5.141285  -7.375380 
-0.002000  17.860936  1.438642  8.330352 18.966425  -5.141456  -7.375643 
-0.002500  17.861623  1.438640  8.330653 18.966808  -5.141627  -7.375907 
## Displacement Atom 15 Coordinate 1 (Angstrom), D11 , D12 , D13 , D22 , D23 , D33 
0.002500  17.858064  1.437026  8.329145 18.967148  -5.140366  -7.375585 
0.002000  17.857984  1.437448  8.329107 18.966507  -5.140412  -7.375289 
0.001500  17.858048  1.437781  8.329117 18.966053  -5.140508  -7.375098 
0.001000  17.858565  1.437986  8.329310 18.966006  -5.140715  -7.375154 
0.000750  17.858568  1.438138  8.329321 18.965802  -5.140746  -7.375057 
0.000000  17.858237  1.438637  8.329163 18.964931  -5.140769  -7.374621 
-0.000750  17.858555  1.439052  8.329371 18.964559  -5.140924  -7.374465 
-0.001000  17.858546  1.439205  8.329376 18.964349  -5.140952  -7.374364 
-0.001500  17.858645  1.439468  8.329348 18.963994  -5.141081  -7.374234 
-0.002000  17.858734  1.439792  8.329376 18.963574  -5.141175  -7.374059 
-0.002500  17.858864  1.440173  8.329448 18.963115  -5.141251  -7.373871 
## Displacement Atom 15 Coordinate 2 (Angstrom), D11 , D12 , D13 , D22 , D23 , D33 
0.002500  17.859950  1.437483  8.329148 18.966945  -5.142589  -7.375714 
0.002000  17.859667  1.437715  8.329295 18.966625  -5.142199  -7.375500 
0.001500  17.859349  1.437943  8.329285 18.966229  -5.141851  -7.375295 
0.001000  17.859343  1.438077  8.329418 18.966116  -5.141591  -7.375254 
0.000750  17.859152  1.438206  8.329403 18.965885  -5.141403  -7.375132 
0.000000  17.858237  1.438637  8.329163 18.964931  -5.140769  -7.374621 
-0.000750  17.857985  1.438981  8.329297 18.964487  -5.140270  -7.374396 
-0.001000  17.857787  1.439111  8.329278 18.964253  -5.140081  -7.374273 
-0.001500  17.857343  1.439305  8.329181 18.963818  -5.139740  -7.374036 
-0.002000  17.856993  1.439531  8.329156 18.963409  -5.139385  -7.373821 
-0.002500  17.856781  1.439748  8.329346 18.963160  -5.139005  -7.373644 
## Displacement Atom 15 Coordinate 3 (Angstrom), D11 , D12 , D13 , D22 , D23 , D33 
0.002500  17.869085  1.438110  8.332003 18.970158  -5.143059  -7.379367 
0.002000  17.866507  1.438192  8.331317 18.968958  -5.142492  -7.378267 
0.001500  17.864136  1.438241  8.330721 18.967913  -5.141960  -7.377268 
0.001000  17.861063  1.438357  8.329848 18.966420  -5.141277  -7.375954 
0.000750  17.860389  1.438378  8.329745 18.966156  -5.141127  -7.375657 
0.000000  17.858237  1.438637  8.329163 18.964931  -5.140769  -7.374621 
-0.000750  17.856770  1.438810  8.328964 18.964226  -5.140550  -7.373880 
-0.001000  17.855684  1.438891  8.328641 18.963651  -5.140326  -7.373397 
-0.001500  17.853134  1.438935  8.328033 18.962552  -5.139732  -7.372325 
-0.002000  17.850307  1.438973  8.327274 18.961310  -5.139076  -7.371158 
-0.002500  17.848223  1.439073  8.326742 18.960322  -5.138634  -7.370248 
## Displacement Atom 16 Coordinate 1 (Angstrom), D11 , D12 , D13 , D22 , D23 , D33 
0.002500  17.862235  1.438016  8.331260 18.968048  -5.141707  -7.376412 
0.002000  17.861519  1.438130  8.330887 18.967488  -5.141536  -7.376090 
0.001500  17.859927  1.438385  8.330068 18.966249  -5.141190  -7.375362 
0.001000  17.859345  1.438474  8.329761 18.965796  -5.141050  -7.375103 
0.000750  17.859171  1.438495  8.329673 18.965663  -5.140991  -7.375031 
0.000000  17.858237  1.438637  8.329163 18.964931  -5.140769  -7.374621 
-0.000750  17.857680  1.438734  8.328871 18.964485  -5.140634  -7.374367 
-0.001000  17.857011  1.438832  8.328528 18.963980  -5.140488  -7.374066 
-0.001500  17.856426  1.438921  8.328219 18.963525  -5.140347  -7.373807 
-0.002000  17.855784  1.439032  8.327901 18.963010  -5.140166  -7.373515 
-0.002500  17.855064  1.439145  8.327527 18.962449  -5.139994  -7.373192 
## Displacement Atom 16 Coordinate 2 (Angstrom), D11 , D12 , D13 , D22 , D23 , D33 
0.002500  17.856000  1.438424  8.328408 18.964041  -5.140120  -7.373839 
0.002000  17.856847  1.438419  8.328739 18.964493  -5.140341  -7.374173 
0.001500  17.857295  1.438460  8.328901 18.964679  -5.140468  -7.374329 
0.001000  17.857466  1.438590  8.328892 18.964591  -5.140558  -7.374337 
0.000750  17.857645  1.438605  8.328955 18.964666  -5.140611  -7.374399 
0.000000  17.858237  1.438637  8.329163 18.964931  -5.140769  -7.374621 
-0.000750  17.858713  1.438701  8.329333 18.965111  -5.140927  -7.374771 
-0.001000  17.858891  1.438717  8.329396 18.965185  -5.140980  -7.374833 
-0.001500  17.859990  1.438708  8.329876 18.965800  -5.141231  -7.375266 
-0.002000  17.860441  1.438749  8.330039 18.965988  -5.141358  -7.375424 
-0.002500  17.860777  1.438819  8.330099 18.966057  -5.141487  -7.375527 
## Displacement Atom 16 Coordinate 3 (Angstrom), D11 , D12 , D13 , D22 , D23 , D33 
0.002500  17.859438  1.438815  8.329668 18.965374  -5.141148  -7.374979 
0.002000  17.858751  1.438808  8.329334 18.964994  -5.140985  -7.374724 
0.001500  17.858609  1.438769  8.329287 18.964968  -5.140931  -7.374690 
0.001000  17.858744  1.438691  8.329344 18.965129  -5.140940  -7.374787 
0.000750  17.858664  1.438672  8.329326 18.965115  -5.140908  -7.374765 
0.000000  17.858237  1.438637  8.329163 18.964931  -5.140769  -7.374621 
-0.000750  17.858185  1.438558  8.329216 18.965031  -5.140717  -7.374633 
-0.001000  17.858105  1.438539  8.329198 18.965017  -5.140685  -7.374611 
-0.001500  17.857749  1.438537  8.329002 18.964809  -5.140607  -7.374481 
-0.002000  17.857604  1.438498  8.328954 18.964782  -5.140553  -7.374446 
-0.002500  17.857808  1.438358  8.329089 18.965077  -5.140543  -7.374599 
## Displacement Atom 17 Coordinate 1 (Angstrom), D11 , D12 , D13 , D22 , D23 , D33 
0.002500  17.837403  1.440224  8.320186 18.951635  -5.136620  -7.365581 
0.002000  17.841619  1.439897  8.322011 18.954338  -5.137459  -7.367411 
0.001500  17.847474  1.439451  8.324562 18.958094  -5.138647  -7.369941 
0.001000  17.853114  1.439041  8.326935 18.961652  -5.139789  -7.372388 
0.000750  17.854723  1.438895  8.327706 18.962734  -5.140107  -7.373081 
0.000000  17.858237  1.438637  8.329163 18.964931  -5.140769  -7.374621 
-0.000750  17.862425  1.438297  8.330999 18.967638  -5.141569  -7.376450 
-0.001000  17.863623  1.438213  8.331552 18.968409  -5.141812  -7.376955 
-0.001500  17.869866  1.437724  8.334243 18.972419  -5.143055  -7.379677 
-0.002000  17.875942  1.437265  8.336904 18.976325  -5.144279  -7.382306 
-0.002500  17.880324  1.436934  8.338811 18.979130  -5.145149  -7.384205 
## Displacement Atom 17 Coordinate 2 (Angstrom), D11 , D12 , D13 , D22 , D23 , D33 
0.002500  17.866154  1.437833  8.333844 18.970890  -5.141181  -7.378176 
0.002000  17.863656  1.438051  8.332481 18.969110  -5.141013  -7.377058 
0.001500  17.862317  1.438196  8.331662 18.968078  -5.140956  -7.376454 
0.001000  17.861146  1.438307  8.330932 18.967183  -5.140928  -7.375932 
0.000750  17.860499  1.438380  8.330535 18.966681  -5.140904  -7.375639 
0.000000  17.858237  1.438637  8.329163 18.964931  -5.140769  -7.374621 
-0.000750  17.856637  1.438811  8.328163 18.963685  -5.140769  -7.373887 
-0.001000  17.855996  1.438883  8.327770 18.963187  -5.140747  -7.373596 
-0.001500  17.854364  1.439063  8.326792 18.961941  -5.140636  -7.372865 
-0.002000  17.852805  1.439204  8.325881 18.960794  -5.140589  -7.372165 
-0.002500  17.851076  1.439352  8.324895 18.959540  -5.140507  -7.371393 
## Displacement Atom 17 Coordinate 3 (Angstrom), D11 , D12 , D13 , D22 , D23 , D33 
0.002500  17.832339  1.440498  8.320949 18.949565  -5.136628  -7.362439 
0.002000  17.837766  1.440116  8.322588 18.952742  -5.137487  -7.365008 
0.001500  17.842509  1.439746  8.323968 18.955536  -5.138190  -7.367295 
0.001000  17.847051  1.439374  8.325394 18.958280  -5.138867  -7.369471 
0.000750  17.849928  1.439179  8.326382 18.960005  -5.139359  -7.370793 
0.000000  17.858237  1.438637  8.329163 18.964931  -5.140769  -7.374621 
-0.000750  17.867220  1.438016  8.332318 18.970362  -5.142314  -7.378739 
-0.001000  17.870109  1.437824  8.333309 18.972090  -5.142806  -7.380066 
-0.001500  17.874326  1.437513  8.334548 18.974569  -5.143420  -7.382095 
-0.002000  17.879180  1.437142  8.335975 18.977430  -5.144135  -7.384434 
-0.002500  17.884971  1.436730  8.337778 18.980847  -5.145046  -7.387172 
## Displacement Atom 18 Coordinate 1 (Angstrom), D11 , D12 , D13 , D22 , D23 , D33 
0.002500  17.851971  1.438906  8.326665 18.961210  -5.139293  -7.371995 
0.002000  17.853628  1.438865  8.327300 18.962152  -5.139708  -7.372673 
0.001500  17.854767  1.438812  8.327762 18.962837  -5.139973  -7.373152 
0.001000  17.856349  1.438692  8.328378 18.963826  -5.140298  -7.373856 
0.000750  17.856869  1.438673  8.328601 18.964138  -5.140426  -7.374067 
0.000000  17.858237  1.438637  8.329163 18.964931  -5.140769  -7.374621 
-0.000750  17.859980  1.438558  8.329941 18.966008  -5.141198  -7.375330 
-0.001000  17.860499  1.438538  8.330164 18.966319  -5.141327  -7.375541 
-0.001500  17.861600  1.438494  8.330532 18.966945  -5.141566  -7.376022 
-0.002000  17.862738  1.438441  8.330994 18.967629  -5.141831  -7.376500 
-0.002500  17.863876  1.438389  8.331455 18.968313  -5.142096  -7.376979 
## Displacement Atom 18 Coordinate 2 (Angstrom), D11 , D12 , D13 , D22 , D23 , D33 
0.002500  17.859534  1.438657  8.329892 18.965720  -5.140667  -7.375175 
0.002000  17.859355  1.438642  8.329791 18.965623  -5.140703  -7.375099 
0.001500  17.858675  1.438688  8.329414 18.965157  -5.140684  -7.374797 
0.001000  17.858775  1.438638  8.329473 18.965267  -5.140784  -7.374838 
0.000750  17.858687  1.438633  8.329422 18.965219  -5.140791  -7.374803 
0.000000  17.858237  1.438637  8.329163 18.964931  -5.140769  -7.374621 
-0.000750  17.858165  1.438597  8.329122 18.964930  -5.140835  -7.374595 
-0.001000  17.857796  1.438638  8.328938 18.964670  -5.140817  -7.374420 
-0.001500  17.857620  1.438628  8.328843 18.964573  -5.140843  -7.374345 
-0.002000  17.857944  1.438525  8.328993 18.964866  -5.140998  -7.374502 
-0.002500  17.857771  1.438510  8.328894 18.964774  -5.141035  -7.374429 
## Displacement Atom 18 Coordinate 3 (Angstrom), D11 , D12 , D13 , D22 , D23 , D33 
0.002500  17.854706  1.438755  8.327639 18.962845  -5.139986  -7.373181 
0.002000  17.855480  1.438722  8.327982 18.963314  -5.140156  -7.373498 
0.001500  17.856255  1.438690  8.328326 18.963784  -5.140327  -7.373816 
0.001000  17.857015  1.438699  8.328623 18.964185  -5.140510  -7.374112 
0.000750  17.857307  1.438687  8.328754 18.964362  -5.140575  -7.374231 
0.000000  17.858237  1.438637  8.329163 18.964931  -5.140769  -7.374621 
-0.000750  17.859065  1.438617  8.329542 18.965426  -5.140966  -7.374946 
-0.001000  17.859359  1.438606  8.329674 18.965603  -5.141031  -7.375066 
-0.001500  17.860925  1.438495  8.330395 18.966614  -5.141354  -7.375731 
-0.002000  17.861709  1.438462  8.330742 18.967089  -5.141527  -7.376052 
-0.002500  17.862494  1.438430  8.331089 18.967564  -5.141699  -7.376374 
## Displacement Atom 19 Coordinate 1 (Angstrom), D11 , D12 , D13 , D22 , D23 , D33 
0.002500  17.858433  1.437904  8.328523 18.965606  -5.140810  -7.375238 
0.002000  17.858456  1.438062  8.328681 18.965495  -5.140833  -7.375128 
0.001500  17.858506  1.438185  8.328754 18.965391  -5.140873  -7.375065 
0.001000  17.858405  1.438358  8.328833 18.965182  -5.140864  -7.374905 
0.000750  17.858578  1.438387  8.328959 18.965259  -5.140899  -7.374947 
0.000000  17.858237  1.438637  8.329163 18.964931  -5.140769  -7.374621 
-0.000750  17.858573  1.438801  8.329748 18.965120  -5.140776  -7.374587 
-0.001000  17.858273  1.438898  8.329621 18.964841  -5.140725  -7.374415 
-0.001500  17.858671  1.438997  8.329964 18.965016  -5.140800  -7.374485 
-0.002000  17.858581  1.439139  8.329957 18.964810  -5.140812  -7.374362 
-0.002500  17.858873  1.439257  8.330260 18.964908  -5.140880  -7.374375 
## Displacement Atom 19 Coordinate 2 (Angstrom), D11 , D12 , D13 , D22 , D23 , D33 
0.002500  17.862880  1.438829  8.333550 18.968395  -5.142791  -7.375588 
0.002000  17.861960  1.438799  8.332708 18.967715  -5.142392  -7.375387 
0.001500  17.861148  1.438742  8.331886 18.967112  -5.142008  -7.375248 
0.001000  17.860463  1.438668  8.330910 18.966499  -5.141724  -7.375197 
0.000750  17.859545  1.438679  8.330182 18.965825  -5.141391  -7.374934 
0.000000  17.858237  1.438637  8.329163 18.964931  -5.140769  -7.374621 
-0.000750  17.857114  1.438580  8.328260 18.964182  -5.140196  -7.374378 
-0.001000  17.856883  1.438488  8.327892 18.964035  -5.139976  -7.374432 
-0.001500  17.856274  1.438403  8.326956 18.963489  -5.139700  -7.374418 
-0.002000  17.855461  1.438346  8.326133 18.962884  -5.139314  -7.374280 
-0.002500  17.854750  1.438284  8.325394 18.962365  -5.138949  -7.374178 
## Displacement Atom 19 Coordinate 3 (Angstrom), D11 , D12 , D13 , D22 , D23 , D33 
0.002500  17.861743  1.440259  8.332074 18.965451  -5.143191  -7.374438 
0.002000  17.861423  1.439859  8.331613 18.965624  -5.142823  -7.374664 
0.001500  17.860535  1.439542  8.331022 18.965446  -5.142251  -7.374619 
0.001000  17.859786  1.439218  8.330454 18.965332  -5.141737  -7.374634 
0.000750  17.859836  1.439001  8.330300 18.965546  -5.141613  -7.374837 
0.000000  17.858237  1.438637  8.329163 18.964931  -5.140769  -7.374621 
-0.000750  17.857307  1.438188  8.328402 18.964826  -5.140061  -7.374693 
-0.001000  17.856884  1.438053  8.328084 18.964705  -5.139802  -7.374669 
-0.001500  17.856310  1.437693  8.327520 18.964706  -5.139364  -7.374778 
-0.002000  17.855708  1.437333  8.327074 18.964747  -5.138837  -7.374868 
-0.002500  17.855241  1.436954  8.326527 18.964814  -5.138439  -7.375033 
## Displacement Atom 20 Coordinate 1 (Angstrom), D11 , D12 , D13 , D22 , D23 , D33 
0.002500  17.826380  1.439878  8.311715 18.943616  -5.131336  -7.362802 
0.002000  17.833026  1.439653  8.315650 18.948161  -5.133314  -7.365181 
0.001500  17.839356  1.439397  8.319045 18.952375  -5.135186  -7.367550 
0.001000  17.845455  1.439149  8.321952 18.956262  -5.137101  -7.369885 
0.000750  17.848726  1.439012  8.323798 18.958487  -5.138034  -7.371101 
0.000000  17.858237  1.438637  8.329163 18.964931  -5.140769  -7.374621 
-0.000750  17.868354  1.438186  8.334872 18.971838  -5.143627  -7.378402 
-0.001000  17.871626  1.438048  8.336719 18.974064  -5.144558  -7.379621 
-0.001500  17.877343  1.437855  8.339427 18.977666  -5.146398  -7.381789 
-0.002000  17.883674  1.437597  8.342826 18.981882  -5.148262  -7.384166 
-0.002500  17.890508  1.437343  8.346870 18.986573  -5.150264  -7.386640 
## Displacement Atom 20 Coordinate 2 (Angstrom), D11 , D12 , D13 , D22 , D23 , D33 
0.002500  17.853435  1.440066  8.329702 18.962219  -5.143279  -7.370621 
0.002000  17.854280  1.439693  8.329555 18.962809  -5.142515  -7.371477 
0.001500  17.855293  1.439428  8.329473 18.963358  -5.142087  -7.372271 
0.001000  17.856327  1.439201  8.329123 18.963742  -5.141682  -7.373110 
0.000750  17.856879  1.439051  8.329176 18.964097  -5.141469  -7.373519 
0.000000  17.858237  1.438637  8.329163 18.964931  -5.140769  -7.374621 
-0.000750  17.860214  1.438145  8.329497 18.966237  -5.140194  -7.375989 
-0.001000  17.860774  1.437993  8.329552 18.966597  -5.139981  -7.376403 
-0.001500  17.861438  1.437818  8.329002 18.966704  -5.139503  -7.377078 
-0.002000  17.862474  1.437547  8.328926 18.967270  -5.139071  -7.377887 
-0.002500  17.863559  1.437139  8.328891 18.968039  -5.138339  -7.378858 
## Displacement Atom 20 Coordinate 3 (Angstrom), D11 , D12 , D13 , D22 , D23 , D33 
0.002500  17.825267  1.448989  8.331085 18.940935  -5.152982  -7.347880 
0.002000  17.832043  1.446844  8.330612 18.945853  -5.150446  -7.353411 
0.001500  17.838732  1.444605  8.329976 18.950782  -5.147685  -7.359033 
0.001000  17.844652  1.442876  8.329823 18.955018  -5.145759  -7.363659 
0.000750  17.848124  1.441806  8.329700 18.957554  -5.144526  -7.366433 
0.000000  17.858237  1.438637  8.329163 18.964931  -5.140769  -7.374621 
-0.000750  17.868946  1.435394  8.328965 18.972764  -5.137137  -7.383060 
-0.001000  17.872416  1.434326  8.328843 18.975298  -5.135907  -7.385829 
-0.001500  17.877974  1.432652  8.328493 18.979258  -5.133916  -7.390288 
-0.002000  17.884824  1.430394  8.327957 18.984315  -5.131196  -7.395967 
-0.002500  17.891415  1.428340  8.327623 18.989118  -5.128792  -7.401277 
## Displacement Atom 21 Coordinate 1 (Angstrom), D11 , D12 , D13 , D22 , D23 , D33 
0.002500  17.861695  1.439085  8.332428 18.967183  -5.143216  -7.374952 
0.002000  17.860619  1.438983  8.331445 18.966468  -5.142497  -7.374813 
0.001500  17.860009  1.438901  8.330870 18.966073  -5.142065  -7.374756 
0.001000  17.859716  1.438773  8.330480 18.965927  -5.141650  -7.374849 
0.000750  17.859394  1.438733  8.330178 18.965714  -5.141441  -7.374812 
0.000000  17.858237  1.438637  8.329163 18.964931  -5.140769  -7.374621 
-0.000750  17.857463  1.438496  8.328368 18.964438  -5.140186  -7.374588 
-0.001000  17.857141  1.438457  8.328067 18.964225  -5.139977  -7.374551 
-0.001500  17.856355  1.438406  8.327423 18.963707  -5.139476  -7.374416 
-0.002000  17.855748  1.438323  8.326850 18.963314  -5.139045  -7.374359 
-0.002500  17.855517  1.438097  8.326313 18.963240  -5.138474  -7.374607 
## Displacement Atom 21 Coordinate 2 (Angstrom), D11 , D12 , D13 , D22 , D23 , D33 
0.002500  17.862486  1.437349  8.328522 18.967648  -5.139384  -7.378060 
0.002000  17.861707  1.437598  8.328690 18.967159  -5.139676  -7.377403 
0.001500  17.860388  1.437998  8.328745 18.966249  -5.140055  -7.376379 
0.001000  17.859892  1.438169  8.329069 18.966016  -5.140340  -7.375881 
0.000750  17.859526  1.438280  8.329120 18.965781  -5.140458  -7.375586 
0.000000  17.858237  1.438637  8.329163 18.964931  -5.140769  -7.374621 
-0.000750  17.857331  1.438948  8.329426 18.964371  -5.141168  -7.373815 
-0.001000  17.856966  1.439060  8.329477 18.964137  -5.141286  -7.373521 
-0.001500  17.855957  1.439310  8.329536 18.963518  -5.141480  -7.372786 
-0.002000  17.855494  1.439582  8.330041 18.963257  -5.142006  -7.372155 
-0.002500  17.854720  1.439831  8.330210 18.962770  -5.142297  -7.371499 
## Displacement Atom 21 Coordinate 3 (Angstrom), D11 , D12 , D13 , D22 , D23 , D33 
0.002500  17.853142  1.439446  8.328791 18.962048  -5.141234  -7.371422 
0.002000  17.854554  1.439168  8.328999 18.962968  -5.141041  -7.372330 
0.001500  17.855557  1.439025  8.329086 18.963521  -5.140990  -7.372939 
0.001000  17.856487  1.438894  8.328994 18.963960  -5.140853  -7.373562 
0.000750  17.856910  1.438834  8.329032 18.964191  -5.140832  -7.373818 
0.000000  17.858237  1.438637  8.329163 18.964931  -5.140769  -7.374621 
-0.000750  17.859441  1.438474  8.329253 18.965579  -5.140705  -7.375349 
-0.001000  17.859862  1.438414  8.329290 18.965810  -5.140684  -7.375605 
-0.001500  17.861574  1.438168  8.329612 18.966841  -5.140684  -7.376585 
-0.002000  17.862577  1.438025  8.329700 18.967394  -5.140633  -7.377192 
-0.002500  17.863655  1.437796  8.329724 18.968058  -5.140376  -7.377951 
## Displacement Atom 22 Coordinate 1 (Angstrom), D11 , D12 , D13 , D22 , D23 , D33 
0.002500  17.865074  1.437761  8.332551 18.969988  -5.141751  -7.377786 
0.002000  17.863767  1.437929  8.331907 18.969023  -5.141567  -7.377179 
0.001500  17.861520  1.438219  8.330801 18.967370  -5.141265  -7.376132 
0.001000  17.860411  1.438363  8.330251 18.966546  -5.141100  -7.375619 
0.000750  17.860039  1.438380  8.330104 18.966318  -5.141036  -7.375456 
0.000000  17.858237  1.438637  8.329163 18.964931  -5.140769  -7.374621 
-0.000750  17.856783  1.438854  8.328424 18.963807  -5.140584  -7.373929 
-0.001000  17.855974  1.438939  8.328052 18.963251  -5.140443  -7.373565 
-0.001500  17.854866  1.439082  8.327503 18.962429  -5.140279  -7.373052 
-0.002000  17.853323  1.439267  8.326768 18.961311  -5.140099  -7.372327 
-0.002500  17.852018  1.439433  8.326127 18.960348  -5.139915  -7.371721 
## Displacement Atom 22 Coordinate 2 (Angstrom), D11 , D12 , D13 , D22 , D23 , D33 
0.002500  17.856432  1.438828  8.328451 18.963669  -5.140472  -7.373762 
0.002000  17.857215  1.438695  8.328910 18.964334  -5.140506  -7.374148 
0.001500  17.857546  1.438671  8.329016 18.964541  -5.140588  -7.374298 
0.001000  17.857540  1.438712  8.328968 18.964487  -5.140654  -7.374272 
0.000750  17.857970  1.438620  8.329209 18.964864  -5.140649  -7.374501 
0.000000  17.858237  1.438637  8.329163 18.964931  -5.140769  -7.374621 
-0.000750  17.858860  1.438613  8.329323 18.965267  -5.140972  -7.374887 
-0.001000  17.858843  1.438590  8.329333 18.965308  -5.140888  -7.374910 
-0.001500  17.859554  1.438525  8.329662 18.965798  -5.141079  -7.375212 
-0.002000  17.859892  1.438500  8.329771 18.966010  -5.141161  -7.375366 
-0.002500  17.860361  1.438413  8.330063 18.966438  -5.141135  -7.375611 
## Displacement Atom 22 Coordinate 3 (Angstrom), D11 , D12 , D13 , D22 , D23 , D33 
0.002500  17.853982  1.439122  8.326886 18.961827  -5.140307  -7.372692 
0.002000  17.854897  1.439017  8.327377 18.962496  -5.140412  -7.373105 
0.001500  17.855555  1.438960  8.327735 18.962961  -5.140485  -7.373392 
0.001000  17.856357  1.438872  8.328119 18.963513  -5.140618  -7.373752 
0.000750  17.856870  1.438808  8.328405 18.963900  -5.140665  -7.373987 
0.000000  17.858237  1.438637  8.329163 18.964931  -5.140769  -7.374621 
-0.000750  17.859941  1.438427  8.330117 18.966217  -5.140953  -7.375393 
-0.001000  17.860452  1.438364  8.330402 18.966602  -5.141001  -7.375627 
-0.001500  17.860850  1.438339  8.330579 18.966851  -5.141063  -7.375799 
-0.002000  17.861729  1.438236  8.331051 18.967497  -5.141159  -7.376199 
-0.002500  17.863078  1.438079  8.331774 18.968483  -5.141358  -7.376799 
## Displacement Atom 23 Coordinate 1 (Angstrom), D11 , D12 , D13 , D22 , D23 , D33 
0.002500  17.820708  1.444481  8.319791 18.940038  -5.140383  -7.353408 
0.002000  17.827744  1.443434  8.321611 18.944685  -5.140512  -7.357334 
0.001500  17.835059  1.442076  8.323001 18.949625  -5.140208  -7.361777 
0.001000  17.842475  1.441068  8.325140 18.954488  -5.140554  -7.365761 
0.000750  17.846481  1.440452  8.326184 18.957150  -5.140622  -7.368004 
0.000000  17.858237  1.438637  8.329163 18.964931  -5.140769  -7.374621 
-0.000750  17.870532  1.436758  8.332448 18.973121  -5.141026  -7.381468 
-0.001000  17.873919  1.436329  8.333409 18.975302  -5.141192  -7.383276 
-0.001500  17.881703  1.435181  8.335494 18.980440  -5.141387  -7.387583 
-0.002000  17.889421  1.433766  8.337089 18.985680  -5.141140  -7.392217 
-0.002500  17.896529  1.432720  8.338938 18.990365  -5.141268  -7.396181 
## Displacement Atom 23 Coordinate 2 (Angstrom), D11 , D12 , D13 , D22 , D23 , D33 
0.002500  17.864812  1.437826  8.325598 18.966122  -5.144887  -7.378293 
0.002000  17.864200  1.437912  8.326537 18.966337  -5.144053  -7.377932 
0.001500  17.863335  1.438070  8.327753 18.966496  -5.143357  -7.377302 
0.001000  17.861679  1.438256  8.328249 18.966007  -5.142504  -7.376425 
0.000750  17.861148  1.438289  8.328432 18.965912  -5.142059  -7.376198 
0.000000  17.858237  1.438637  8.329163 18.964931  -5.140769  -7.374621 
-0.000750  17.855884  1.438915  8.330213 18.964379  -5.139596  -7.373282 
-0.001000  17.855004  1.438998  8.330213 18.964024  -5.139087  -7.372897 
-0.001500  17.853322  1.439183  8.330696 18.963520  -5.138230  -7.372010 
-0.002000  17.852643  1.439309  8.332011 18.963827  -5.137565  -7.371466 
-0.002500  17.851867  1.439414  8.333094 18.964021  -5.136814  -7.370953 
## Displacement Atom 23 Coordinate 3 (Angstrom), D11 , D12 , D13 , D22 , D23 , D33 
0.002500  17.922458  1.437824  8.368086 19.006357  -5.160266  -7.396388 
0.002000  17.909272  1.437971  8.360129 18.997885  -5.156292  -7.391905 
0.001500  17.894605  1.438138  8.351376 18.988507  -5.151867  -7.386900 
0.001000  17.880303  1.438463  8.343101 18.979293  -5.147716  -7.381846 
0.000750  17.874811  1.438501  8.339632 18.975725  -5.145987  -7.380049 
0.000000  17.858237  1.438637  8.329163 18.964931  -5.140769  -7.374621 
-0.000750  17.841906  1.438777  8.318848 18.954301  -5.135609  -7.369282 
-0.001000  17.835501  1.438838  8.314922 18.950183  -5.133594  -7.367159 
-0.001500  17.822603  1.439152  8.307359 18.941809  -5.129792  -7.362650 
-0.002000  17.808369  1.439358  8.298816 18.932654  -5.125411  -7.357840 
-0.002500  17.795557  1.439580  8.291040 18.924332  -5.121480  -7.353513 
## Displacement Atom 24 Coordinate 1 (Angstrom), D11 , D12 , D13 , D22 , D23 , D33 
0.002500  17.853156  1.437717  8.331200 18.965473  -5.139572  -7.372288 
0.002000  17.854253  1.437890  8.330837 18.965426  -5.139829  -7.372790 
0.001500  17.855148  1.438177  8.330114 18.964986  -5.140095  -7.373194 
0.001000  17.856434  1.438251  8.329975 18.965230  -5.140343  -7.373803 
0.000750  17.856971  1.438337  8.329820 18.965220  -5.140467  -7.374044 
0.000000  17.858237  1.438637  8.329163 18.964931  -5.140769  -7.374621 
-0.000750  17.860149  1.438856  8.328872 18.965137  -5.141200  -7.375476 
-0.001000  17.860673  1.438944  8.328710 18.965120  -5.141320  -7.375713 
-0.001500  17.861523  1.439083  8.328340 18.965037  -5.141484  -7.376126 
-0.002000  17.862791  1.439318  8.327814 18.964891  -5.141804  -7.376706 
-0.002500  17.863905  1.439468  8.327464 18.964884  -5.142029  -7.377233 
## Displacement Atom 24 Coordinate 2 (Angstrom), D11 , D12 , D13 , D22 , D23 , D33 
0.002500  17.854728  1.437787  8.328528 18.964910  -5.138630  -7.374004 
0.002000  17.855740  1.438008  8.328708 18.964974  -5.139187  -7.374220 
0.001500  17.856861  1.438148  8.329047 18.965246  -5.139701  -7.374514 
0.001000  17.857904  1.438399  8.329223 18.965282  -5.140302  -7.374721 
0.000750  17.858332  1.438411  8.329416 18.965458  -5.140478  -7.374844 
0.000000  17.858237  1.438637  8.329163 18.964931  -5.140769  -7.374621 
-0.000750  17.858806  1.438779  8.329285 18.964910  -5.141194  -7.374683 
-0.001000  17.858884  1.438841  8.329264 18.964818  -5.141313  -7.374656 
-0.001500  17.858985  1.438976  8.329236 18.964600  -5.141529  -7.374563 
-0.002000  17.861322  1.439203  8.329946 18.965338  -5.142455  -7.375276 
-0.002500  17.862543  1.439403  8.330234 18.965554  -5.143043  -7.375587 
## Displacement Atom 24 Coordinate 3 (Angstrom), D11 , D12 , D13 , D22 , D23 , D33 
0.002500  17.859200  1.439845  8.325973 18.962570  -5.142650  -7.374858 
0.002000  17.859331  1.439665  8.326698 18.963102  -5.142339  -7.374912 
0.001500  17.859181  1.439450  8.327408 18.963570  -5.141920  -7.374860 
0.001000  17.859167  1.439204  8.328123 18.964148  -5.141590  -7.374885 
0.000750  17.859018  1.439052  8.328430 18.964407  -5.141402  -7.374855 
0.000000  17.858237  1.438637  8.329163 18.964931  -5.140769  -7.374621 
-0.000750  17.858105  1.438139  8.330262 18.965953  -5.140268  -7.374667 
-0.001000  17.857949  1.437987  8.330566 18.966208  -5.140078  -7.374634 
-0.001500  17.857526  1.437798  8.331064 18.966484  -5.139674  -7.374475 
-0.002000  17.857789  1.437521  8.331992 18.967273  -5.139325  -7.374615 
-0.002500  17.857813  1.437354  8.332659 18.967731  -5.138994  -7.374623 
## Displacement Atom 25 Coordinate 1 (Angstrom), D11 , D12 , D13 , D22 , D23 , D33 
0.002500  17.859690  1.438200  8.330528 18.966609  -5.141354  -7.375189 
0.002000  17.859480  1.438277  8.330300 18.966334  -5.141253  -7.375111 
0.001500  17.858743  1.438463  8.329737 18.965594  -5.141036  -7.374793 
0.001000  17.858555  1.438527  8.329539 18.965359  -5.140947  -7.374724 
0.000750  17.858704  1.438529  8.329515 18.965388  -5.140954  -7.374805 
0.000000  17.858237  1.438637  8.329163 18.964931  -5.140769  -7.374621 
-0.000750  17.858145  1.438700  8.329028 18.964759  -5.140670  -7.374592 
-0.001000  17.857797  1.438780  8.328747 18.964414  -5.140590  -7.374444 
-0.001500  17.857606  1.438843  8.328547 18.964177  -5.140500  -7.374374 
-0.002000  17.857778  1.438892  8.328464 18.964129  -5.140440  -7.374473 
-0.002500  17.857562  1.438969  8.328233 18.963852  -5.140338  -7.374393 
## Displacement Atom 25 Coordinate 2 (Angstrom), D11 , D12 , D13 , D22 , D23 , D33 
0.002500  17.856707  1.438243  8.328919 18.964745  -5.140026  -7.374228 
0.002000  17.856899  1.438418  8.328846 18.964574  -5.140212  -7.374213 
0.001500  17.857217  1.438477  8.328920 18.964652  -5.140351  -7.374305 
0.001000  17.857903  1.438502  8.329117 18.964950  -5.140594  -7.374561 
0.000750  17.858033  1.438530  8.329155 18.964980  -5.140648  -7.374595 
0.000000  17.858237  1.438637  8.329163 18.964931  -5.140769  -7.374621 
-0.000750  17.858816  1.438700  8.329387 18.965165  -5.140977  -7.374802 
-0.001000  17.858946  1.438729  8.329425 18.965196  -5.141031  -7.374837 
-0.001500  17.859124  1.438832  8.329360 18.965112  -5.141183  -7.374858 
-0.002000  17.859441  1.438891  8.329433 18.965189  -5.141322  -7.374950 
-0.002500  17.860487  1.438939  8.329809 18.965666  -5.141655  -7.375326 
## Displacement Atom 25 Coordinate 3 (Angstrom), D11 , D12 , D13 , D22 , D23 , D33 
0.002500  17.859755  1.438651  8.329915 18.965802  -5.141295  -7.375141 
0.002000  17.859524  1.438639  8.329805 18.965683  -5.141204  -7.375068 
0.001500  17.858711  1.438671  8.329426 18.965190  -5.140983  -7.374751 
0.001000  17.858535  1.438664  8.329333 18.965090  -5.140912  -7.374696 
0.000750  17.858699  1.438613  8.329420 18.965244  -5.140918  -7.374790 
0.000000  17.858237  1.438637  8.329163 18.964931  -5.140769  -7.374621 
-0.000750  17.858154  1.438616  8.329125 18.964906  -5.140708  -7.374609 
-0.001000  17.857829  1.438640  8.328960 18.964691  -5.140627  -7.374477 
-0.001500  17.857652  1.438634  8.328867 18.964592  -5.140556  -7.374422 
-0.002000  17.857681  1.438540  8.328932 18.964738  -5.140481  -7.374490 
-0.002500  17.857451  1.438527  8.328824 18.964621  -5.140391  -7.374418 
## Displacement Atom 26 Coordinate 1 (Angstrom), D11 , D12 , D13 , D22 , D23 , D33 
0.002500  17.870720  1.439355  8.329510 18.967802  -5.148480  -7.378726 
0.002000  17.867457  1.439204  8.329297 18.966916  -5.146667  -7.377597 
0.001500  17.864691  1.439026  8.328938 18.966180  -5.145124  -7.376721 
0.001000  17.861946  1.438890  8.328874 18.965511  -5.143458  -7.375791 
0.000750  17.861545  1.438790  8.328968 18.965608  -5.142996  -7.375747 
0.000000  17.858237  1.438637  8.329163 18.964931  -5.140769  -7.374621 
-0.000750  17.855439  1.438422  8.329654 18.964646  -5.138648  -7.373710 
-0.001000  17.854741  1.438365  8.329591 18.964521  -5.138130  -7.373533 
-0.001500  17.852140  1.438209  8.329611 18.963966  -5.136483  -7.372667 
-0.002000  17.849424  1.438022  8.329281 18.963278  -5.134938  -7.371819 
-0.002500  17.846237  1.437862  8.329117 18.962458  -5.133127  -7.370726 
## Displacement Atom 26 Coordinate 2 (Angstrom), D11 , D12 , D13 , D22 , D23 , D33 
0.002500  17.901940  1.438834  8.341823 18.985219  -5.150364  -7.392804 
0.002000  17.892747  1.438726  8.339282 18.981073  -5.148376  -7.388972 
0.001500  17.883301  1.438669  8.336346 18.976627  -5.146333  -7.385088 
0.001000  17.874526  1.438632  8.333886 18.972588  -5.144422  -7.381414 
0.000750  17.870544  1.438619  8.332617 18.970687  -5.143526  -7.379787 
0.000000  17.858237  1.438637  8.329163 18.964931  -5.140769  -7.374621 
-0.000750  17.846372  1.438630  8.325954 18.959494  -5.138091  -7.369641 
-0.001000  17.842059  1.438688  8.324500 18.957326  -5.137120  -7.367866 
-0.001500  17.833359  1.438708  8.322051 18.953297  -5.135175  -7.364232 
-0.002000  17.823784  1.438774  8.318995 18.948676  -5.133034  -7.360300 
-0.002500  17.814445  1.438825  8.316314 18.944320  -5.130927  -7.356414 
## Displacement Atom 26 Coordinate 3 (Angstrom), D11 , D12 , D13 , D22 , D23 , D33 
0.002500  17.839020  1.441933  8.321787 18.950625  -5.136382  -7.365158 
0.002000  17.842591  1.441293  8.323016 18.953253  -5.137247  -7.366949 
0.001500  17.846924  1.440589  8.324682 18.956446  -5.138204  -7.369073 
0.001000  17.850651  1.439934  8.326015 18.959194  -5.139095  -7.370928 
0.000750  17.853123  1.439555  8.327112 18.961048  -5.139589  -7.372106 
0.000000  17.858237  1.438637  8.329163 18.964931  -5.140769  -7.374621 
-0.000750  17.863837  1.437654  8.331496 18.969196  -5.142056  -7.377344 
-0.001000  17.866017  1.437309  8.332439 18.970839  -5.142498  -7.378394 
-0.001500  17.870244  1.436544  8.333904 18.973963  -5.143515  -7.380521 
-0.002000  17.874318  1.435862  8.335575 18.977034  -5.144398  -7.382511 
-0.002500  17.878015  1.435167  8.336878 18.979807  -5.145294  -7.384378 
## Displacement Atom 27 Coordinate 1 (Angstrom), D11 , D12 , D13 , D22 , D23 , D33 
0.002500  17.935199  1.431697  8.362781 19.016179  -5.154850  -7.409042 
0.002000  17.919003  1.433124  8.355632 19.005405  -5.151854  -7.401830 
0.001500  17.902585  1.434613  8.348476 18.994477  -5.148891  -7.394467 
0.001000  17.885200  1.436154  8.340698 18.982852  -5.145634  -7.386767 
0.000750  17.878486  1.436772  8.337831 18.978394  -5.144425  -7.383739 
0.000000  17.858237  1.438637  8.329163 18.964931  -5.140769  -7.374621 
-0.000750  17.838227  1.440483  8.320638 18.951646  -5.137165  -7.365604 
-0.001000  17.831524  1.441102  8.317774 18.947189  -5.135955  -7.362588 
-0.001500  17.814346  1.442583  8.310235 18.935808  -5.132736  -7.354991 
-0.002000  17.798411  1.444050  8.303178 18.925108  -5.129810  -7.347902 
-0.002500  17.782401  1.445467  8.296106 18.914429  -5.126818  -7.340820 
## Displacement Atom 27 Coordinate 2 (Angstrom), D11 , D12 , D13 , D22 , D23 , D33 
0.002500  17.871059  1.436773  8.339884 18.977278  -5.141974  -7.380031 
0.002000  17.868583  1.437232  8.337921 18.974817  -5.141862  -7.378880 
0.001500  17.866476  1.437528  8.335882 18.972646  -5.141725  -7.378034 
0.001000  17.863776  1.437896  8.333669 18.970107  -5.141417  -7.376914 
0.000750  17.862287  1.438134  8.332593 18.968732  -5.141278  -7.376240 
0.000000  17.858237  1.438637  8.329163 18.964931  -5.140769  -7.374621 
-0.000750  17.854693  1.439074  8.326027 18.961524  -5.140369  -7.373218 
-0.001000  17.852912  1.439350  8.324799 18.959937  -5.140176  -7.372414 
-0.001500  17.850179  1.439709  8.322577 18.957392  -5.139863  -7.371284 
-0.002000  17.848290  1.439959  8.320665 18.955411  -5.139766  -7.370544 
-0.002500  17.845845  1.440387  8.318729 18.953013  -5.139657  -7.369421 
## Displacement Atom 27 Coordinate 3 (Angstrom), D11 , D12 , D13 , D22 , D23 , D33 
0.002500  17.857412  1.435810  8.323874 18.965874  -5.138884  -7.377362 
0.002000  17.857160  1.436472  8.324957 18.965431  -5.139271  -7.376530 
0.001500  17.857265  1.436971  8.325740 18.965181  -5.139544  -7.376071 
0.001000  17.856846  1.437696  8.326775 18.964585  -5.139948  -7.375124 
0.000750  17.857269  1.437882  8.327235 18.964698  -5.140119  -7.375103 
0.000000  17.858237  1.438637  8.329163 18.964931  -5.140769  -7.374621 
-0.000750  17.859689  1.439335  8.331369 18.965536  -5.141519  -7.374343 
-0.001000  17.859825  1.439561  8.331680 18.965437  -5.141634  -7.374195 
-0.001500  17.859732  1.440235  8.332888 18.965102  -5.142086  -7.373402 
-0.002000  17.859722  1.440745  8.333612 18.964780  -5.142328  -7.372898 
-0.002500  17.859567  1.441387  8.334752 18.964430  -5.142720  -7.372118 
## Displacement Atom 28 Coordinate 1 (Angstrom), D11 , D12 , D13 , D22 , D23 , D33 
0.002500  17.860743  1.438645  8.330843 18.966565  -5.142881  -7.375082 
0.002000  17.860352  1.438645  8.330559 18.966299  -5.142513  -7.375024 
0.001500  17.859945  1.438627  8.330277 18.966051  -5.142099  -7.374977 
0.001000  17.859265  1.438657  8.329899 18.965603  -5.141658  -7.374785 
0.000750  17.858796  1.438593  8.329378 18.965280  -5.141229  -7.374785 
0.000000  17.858237  1.438637  8.329163 18.964931  -5.140769  -7.374621 
-0.000750  17.857849  1.438671  8.329063 18.964718  -5.140358  -7.374518 
-0.001000  17.857834  1.438537  8.328776 18.964748  -5.139998  -7.374730 
-0.001500  17.857531  1.438513  8.328592 18.964587  -5.139622  -7.374712 
-0.002000  17.857134  1.438493  8.328312 18.964346  -5.139211  -7.374671 
-0.002500  17.856919  1.438467  8.328112 18.964212  -5.138876  -7.374694 
## Displacement Atom 28 Coordinate 2 (Angstrom), D11 , D12 , D13 , D22 , D23 , D33 
0.002500  17.858680  1.438807  8.330065 18.965297  -5.141453  -7.374414 
0.002000  17.858655  1.438773  8.329858 18.965236  -5.141304  -7.374499 
0.001500  17.858579  1.438736  8.329703 18.965182  -5.141177  -7.374541 
0.001000  17.858942  1.438665  8.329791 18.965432  -5.141157  -7.374756 
0.000750  17.858849  1.438648  8.329681 18.965370  -5.141077  -7.374758 
0.000000  17.858237  1.438637  8.329163 18.964931  -5.140769  -7.374621 
-0.000750  17.858291  1.438542  8.329020 18.965000  -5.140597  -7.374770 
-0.001000  17.858198  1.438524  8.328910 18.964938  -5.140517  -7.374772 
-0.001500  17.858123  1.438517  8.328767 18.964859  -5.140418  -7.374790 
-0.002000  17.858047  1.438480  8.328610 18.964806  -5.140292  -7.374831 
-0.002500  17.858183  1.438422  8.328491 18.964870  -5.140169  -7.374989 
## Displacement Atom 28 Coordinate 3 (Angstrom), D11 , D12 , D13 , D22 , D23 , D33 
0.002500  17.841961  1.438731  8.321547 18.955492  -5.135328  -7.368769 
0.002000  17.845338  1.438693  8.323071 18.957446  -5.136430  -7.370011 
0.001500  17.848957  1.438658  8.324745 18.959550  -5.137608  -7.371330 
0.001000  17.852355  1.438624  8.326243 18.961497  -5.138707  -7.372588 
0.000750  17.854253  1.438601  8.327174 18.962628  -5.139323  -7.373272 
0.000000  17.858237  1.438637  8.329163 18.964931  -5.140769  -7.374621 
-0.000750  17.862868  1.438594  8.331517 18.967725  -5.142347  -7.376247 
-0.001000  17.864338  1.438634  8.332222 18.968533  -5.142886  -7.376737 
-0.001500  17.868204  1.438537  8.333970 18.970836  -5.144063  -7.378209 
-0.002000  17.871726  1.438523  8.335594 18.972862  -5.145222  -7.379483 
-0.002500  17.875327  1.438463  8.337240 18.974980  -5.146363  -7.380823 
## Displacement Atom 29 Coordinate 1 (Angstrom), D11 , D12 , D13 , D22 , D23 , D33 
0.002500  17.869891  1.437402  8.326264 18.969408  -5.145131  -7.381161 
0.002000  17.867210  1.437677  8.326799 18.968333  -5.144161  -7.379683 
0.001500  17.864508  1.437935  8.327392 18.967303  -5.143232  -7.378181 
0.001000  17.862450  1.438167  8.328003 18.966537  -5.142419  -7.377006 
0.000750  17.861946  1.438250  8.328487 18.966456  -5.142137  -7.376650 
0.000000  17.858237  1.438637  8.329163 18.964931  -5.140769  -7.374621 
-0.000750  17.855109  1.438952  8.330170 18.963850  -5.139523  -7.372839 
-0.001000  17.854264  1.439085  8.330472 18.963512  -5.139179  -7.372329 
-0.001500  17.852231  1.439313  8.331095 18.962766  -5.138373  -7.371165 
-0.002000  17.849791  1.439531  8.331830 18.961940  -5.137489  -7.369782 
-0.002500  17.847294  1.439778  8.332458 18.961007  -5.136551  -7.368389 
## Displacement Atom 29 Coordinate 2 (Angstrom), D11 , D12 , D13 , D22 , D23 , D33 
0.002500  17.839510  1.435763  8.321506 18.958743  -5.120925  -7.372515 
0.002000  17.844169  1.436242  8.323475 18.960631  -5.125148  -7.373325 
0.001500  17.847809  1.436826  8.324962 18.961799  -5.129080  -7.373703 
0.001000  17.852989  1.437198  8.327293 18.964180  -5.133331  -7.374768 
0.000750  17.855039  1.437537  8.328136 18.964829  -5.135525  -7.374978 
0.000000  17.858237  1.438637  8.329163 18.964931  -5.140769  -7.374621 
-0.000750  17.861679  1.439714  8.330341 18.965224  -5.146068  -7.374360 
-0.001000  17.863877  1.440027  8.331265 18.965991  -5.148274  -7.374641 
-0.001500  17.867869  1.440421  8.333037 18.967663  -5.151961  -7.375309 
-0.002000  17.872848  1.440941  8.335168 18.969675  -5.156439  -7.376167 
-0.002500  17.877461  1.441412  8.337120 18.971542  -5.160626  -7.376966 
## Displacement Atom 29 Coordinate 3 (Angstrom), D11 , D12 , D13 , D22 , D23 , D33 
0.002500  17.802161  1.445817  8.296926 18.921511  -5.127212  -7.350962 
0.002000  17.814491  1.444304  8.303938 18.930955  -5.130153  -7.356152 
0.001500  17.825688  1.442811  8.310427 18.939741  -5.132656  -7.360949 
0.001000  17.837538  1.441223  8.317258 18.949024  -5.135384  -7.366018 
0.000750  17.842319  1.440555  8.320034 18.952807  -5.136456  -7.368081 
0.000000  17.858237  1.438637  8.329163 18.964931  -5.140769  -7.374621 
-0.000750  17.874552  1.436621  8.338544 18.977422  -5.145188  -7.381348 
-0.001000  17.878988  1.435967  8.341150 18.980991  -5.146210  -7.383271 
-0.001500  17.890918  1.434227  8.348075 18.990510  -5.148991  -7.388442 
-0.002000  17.901027  1.432747  8.354007 18.998617  -5.151389  -7.392808 
-0.002500  17.913815  1.430852  8.361411 19.008839  -5.154439  -7.398358 
## Displacement Atom 30 Coordinate 1 (Angstrom), D11 , D12 , D13 , D22 , D23 , D33 
0.002500  17.852741  1.439333  8.328588 18.961800  -5.140287  -7.371513 
0.002000  17.853671  1.439182  8.328575 18.962326  -5.140313  -7.372096 
0.001500  17.854843  1.439043  8.328741 18.963001  -5.140434  -7.372739 
0.001000  17.856083  1.438889  8.328932 18.963727  -5.140557  -7.373421 
0.000750  17.856703  1.438816  8.329036 18.964090  -5.140627  -7.373756 
0.000000  17.858237  1.438637  8.329163 18.964931  -5.140769  -7.374621 
-0.000750  17.860412  1.438378  8.329652 18.966260  -5.141042  -7.375761 
-0.001000  17.861028  1.438305  8.329753 18.966620  -5.141111  -7.376095 
-0.001500  17.861819  1.438217  8.329704 18.967007  -5.141153  -7.376574 
-0.002000  17.862973  1.438081  8.329859 18.967667  -5.141271  -7.377209 
-0.002500  17.864050  1.437910  8.329924 18.968306  -5.141321  -7.377859 
## Displacement Atom 30 Coordinate 2 (Angstrom), D11 , D12 , D13 , D22 , D23 , D33 
0.002500  17.885174  1.434261  8.344580 18.987127  -5.144048  -7.387373 
0.002000  17.878641  1.435333  8.340857 18.981745  -5.143247  -7.384273 
0.001500  17.873797  1.436164  8.338030 18.977659  -5.142721  -7.381947 
0.001000  17.867025  1.437273  8.334192 18.972091  -5.141919  -7.378724 
0.000750  17.865486  1.437535  8.333269 18.970773  -5.141766  -7.377985 
0.000000  17.858237  1.438637  8.329163 18.964931  -5.140769  -7.374621 
-0.000750  17.851634  1.439648  8.325426 18.959593  -5.139904  -7.371538 
-0.001000  17.849616  1.439974  8.324250 18.957921  -5.139664  -7.370586 
-0.001500  17.843196  1.441002  8.320609 18.952656  -5.138923  -7.367540 
-0.002000  17.836918  1.442018  8.317008 18.947471  -5.138202  -7.364560 
-0.002500  17.831424  1.442872  8.313886 18.942996  -5.137531  -7.361977 
## Displacement Atom 30 Coordinate 3 (Angstrom), D11 , D12 , D13 , D22 , D23 , D33 
0.002500  17.867746  1.436723  8.334106 18.972672  -5.140035  -7.379764 
0.002000  17.865936  1.437094  8.333167 18.971195  -5.140198  -7.378776 
0.001500  17.865480  1.437269  8.332982 18.970790  -5.140659  -7.378389 
0.001000  17.863728  1.437645  8.332092 18.969355  -5.140915  -7.377399 
0.000750  17.863227  1.437790  8.331825 18.968893  -5.141096  -7.377074 
0.000000  17.858237  1.438637  8.329163 18.964931  -5.140769  -7.374621 
-0.000750  17.853889  1.439400  8.326865 18.961463  -5.140574  -7.372445 
-0.001000  17.852944  1.439608  8.326362 18.960668  -5.140673  -7.371920 
-0.001500  17.851674  1.439910  8.325727 18.959605  -5.141010  -7.371153 
-0.002000  17.850999  1.440128  8.325403 18.959006  -5.141424  -7.370665 
-0.002500  17.849535  1.440436  8.324669 18.957828  -5.141657  -7.369838 
## Displacement Atom 31 Coordinate 1 (Angstrom), D11 , D12 , D13 , D22 , D23 , D33 
0.002500  17.859401  1.438793  8.330333 18.965647  -5.141136  -7.374811 
0.002000  17.859248  1.438751  8.330144 18.965565  -5.141079  -7.374807 
0.001500  17.858590  1.438751  8.329640 18.965120  -5.140917  -7.374605 
0.001000  17.858445  1.438720  8.329471 18.965037  -5.140866  -7.374595 
0.000750  17.858650  1.438653  8.329514 18.965208  -5.140884  -7.374727 
0.000000  17.858237  1.438637  8.329163 18.964931  -5.140769  -7.374621 
-0.000750  17.858220  1.438574  8.329039 18.964954  -5.140745  -7.374679 
-0.001000  17.857857  1.438595  8.328789 18.964698  -5.140662  -7.374550 
-0.001500  17.857708  1.438564  8.328618 18.964611  -5.140610  -7.374537 
-0.002000  17.858012  1.438420  8.328620 18.964896  -5.140615  -7.374776 
-0.002500  17.857856  1.438379  8.328428 18.964811  -5.140556  -7.374772 
## Displacement Atom 31 Coordinate 2 (Angstrom), D11 , D12 , D13 , D22 , D23 , D33 
0.002500  17.865758  1.437697  8.333121 18.970532  -5.142214  -7.377947 
0.002000  17.864323  1.437877  8.332368 18.969464  -5.141939  -7.377312 
0.001500  17.861834  1.438198  8.331060 18.967604  -5.141464  -7.376204 
0.001000  17.860619  1.438350  8.330423 18.966701  -5.141233  -7.375666 
0.000750  17.860100  1.438422  8.330143 18.966295  -5.141173  -7.375424 
0.000000  17.858237  1.438637  8.329163 18.964931  -5.140769  -7.374621 
-0.000750  17.856750  1.438808  8.328400 18.963852  -5.140452  -7.373974 
-0.001000  17.855758  1.438953  8.327876 18.963091  -5.140309  -7.373514 
-0.001500  17.854542  1.439104  8.327239 18.962188  -5.140078  -7.372975 
-0.002000  17.852845  1.439304  8.326349 18.960932  -5.139741  -7.372232 
-0.002500  17.851409  1.439482  8.325597 18.959866  -5.139466  -7.371597 
## Displacement Atom 31 Coordinate 3 (Angstrom), D11 , D12 , D13 , D22 , D23 , D33 
0.002500  17.858335  1.438696  8.329348 18.964956  -5.140923  -7.374556 
0.002000  17.858388  1.438674  8.329352 18.965007  -5.140907  -7.374601 
0.001500  17.857878  1.438732  8.329048 18.964630  -5.140784  -7.374395 
0.001000  17.857981  1.438706  8.329081 18.964718  -5.140780  -7.374459 
0.000750  17.858163  1.438660  8.329167 18.964873  -5.140782  -7.374563 
0.000000  17.858237  1.438637  8.329163 18.964931  -5.140769  -7.374621 
-0.000750  17.858688  1.438570  8.329376 18.965274  -5.140844  -7.374835 
-0.001000  17.858384  1.438600  8.329212 18.965064  -5.140759  -7.374714 
-0.001500  17.858482  1.438574  8.329243 18.965149  -5.140754  -7.374777 
-0.002000  17.858790  1.438509  8.329369 18.965392  -5.140773  -7.374945 
-0.002500  17.858837  1.438489  8.329370 18.965438  -5.140756  -7.374987 
## Displacement Atom 32 Coordinate 1 (Angstrom), D11 , D12 , D13 , D22 , D23 , D33 
0.002500  17.845562  1.442183  8.316811 18.950105  -5.144655  -7.367650 
0.002000  17.848143  1.441471  8.319308 18.953102  -5.143886  -7.369063 
0.001500  17.850330  1.440765  8.321920 18.956011  -5.142911  -7.370285 
0.001000  17.854178  1.439977  8.324429 18.959550  -5.142401  -7.372356 
0.000750  17.855278  1.439632  8.325660 18.960959  -5.142010  -7.372958 
0.000000  17.858237  1.438637  8.329163 18.964931  -5.140769  -7.374621 
-0.000750  17.861864  1.437554  8.333042 18.969417  -5.139666  -7.376572 
-0.001000  17.862958  1.437206  8.334272 18.970827  -5.139275  -7.377174 
-0.001500  17.866336  1.436479  8.336538 18.974022  -5.138684  -7.379033 
-0.002000  17.868715  1.435736  8.339249 18.977087  -5.137752  -7.380346 
-0.002500  17.871205  1.435000  8.341952 18.980175  -5.136880  -7.381700 
## Displacement Atom 32 Coordinate 2 (Angstrom), D11 , D12 , D13 , D22 , D23 , D33 
0.002500  17.870108  1.433301  8.340972 18.980606  -5.135119  -7.382539 
0.002000  17.867735  1.434416  8.338484 18.977361  -5.136312  -7.380944 
0.001500  17.865406  1.435473  8.336180 18.974280  -5.137436  -7.379378 
0.001000  17.863423  1.436432  8.334353 18.971658  -5.138454  -7.377971 
0.000750  17.862202  1.436976  8.333098 18.970031  -5.139048  -7.377165 
0.000000  17.858237  1.438637  8.329163 18.964931  -5.140769  -7.374621 
-0.000750  17.854807  1.440222  8.325538 18.960255  -5.142602  -7.372309 
-0.001000  17.853563  1.440760  8.324273 18.958623  -5.143192  -7.371497 
-0.001500  17.851199  1.441753  8.322248 18.955742  -5.144141  -7.369928 
-0.002000  17.848791  1.442790  8.319909 18.952643  -5.145250  -7.368342 
-0.002500  17.846488  1.443849  8.317470 18.949513  -5.146450  -7.366802 
## Displacement Atom 32 Coordinate 3 (Angstrom), D11 , D12 , D13 , D22 , D23 , D33 
0.002500  17.851707  1.434002  8.336806 18.972240  -5.119579  -7.377023 
0.002000  17.853057  1.434926  8.335304 18.970813  -5.123831  -7.376562 
0.001500  17.854749  1.435920  8.333843 18.969432  -5.128509  -7.376134 
0.001000  17.856032  1.436616  8.332494 18.968344  -5.132026  -7.375900 
0.000750  17.856662  1.437112  8.331705 18.967550  -5.134230  -7.375613 
0.000000  17.858237  1.438637  8.329163 18.964931  -5.140769  -7.374621 
-0.000750  17.860426  1.440084  8.326969 18.962779  -5.147431  -7.373889 
-0.001000  17.861051  1.440578  8.326178 18.961983  -5.149628  -7.373600 
-0.001500  17.861971  1.441324  8.324637 18.960621  -5.153069  -7.373198 
-0.002000  17.863810  1.442292  8.323252 18.959349  -5.157758  -7.372831 
-0.002500  17.865146  1.443210  8.321742 18.957909  -5.161989  -7.372358 
## Displacement Atom 33 Coordinate 1 (Angstrom), D11 , D12 , D13 , D22 , D23 , D33 
0.002500  17.859852  1.437888  8.330636 18.967141  -5.139558  -7.375860 
0.002000  17.859607  1.438028  8.330385 18.966758  -5.139815  -7.375646 
0.001500  17.859034  1.438254  8.329899 18.966053  -5.140123  -7.375250 
0.001000  17.858746  1.438388  8.329646 18.965662  -5.140338  -7.375027 
0.000750  17.858736  1.438419  8.329656 18.965613  -5.140463  -7.374971 
0.000000  17.858237  1.438637  8.329163 18.964931  -5.140769  -7.374621 
-0.000750  17.858122  1.438810  8.328890 18.964539  -5.141164  -7.374430 
-0.001000  17.857586  1.438923  8.328629 18.964095  -5.141196  -7.374131 
-0.001500  17.857294  1.439056  8.328374 18.963702  -5.141411  -7.373907 
-0.002000  17.857634  1.439146  8.328368 18.963688  -5.141879  -7.373928 
-0.002500  17.857387  1.439286  8.328115 18.963303  -5.142138  -7.373713 
## Displacement Atom 33 Coordinate 2 (Angstrom), D11 , D12 , D13 , D22 , D23 , D33 
0.002500  17.860150  1.437538  8.331778 18.968457  -5.137357  -7.376541 
0.002000  17.859835  1.437749  8.331293 18.967803  -5.138054  -7.376186 
0.001500  17.859028  1.438106  8.330371 18.966594  -5.138954  -7.375534 
0.001000  17.858747  1.438289  8.329963 18.966026  -5.139560  -7.375219 
0.000750  17.858755  1.438366  8.329775 18.965814  -5.139941  -7.375126 
0.000000  17.858237  1.438637  8.329163 18.964931  -5.140769  -7.374621 
-0.000750  17.858097  1.438864  8.328769 18.964335  -5.141684  -7.374273 
-0.001000  17.857621  1.439016  8.328332 18.963758  -5.141978  -7.373957 
-0.001500  17.857340  1.439198  8.327924 18.963192  -5.142582  -7.373641 
-0.002000  17.857320  1.439436  8.327419 18.962581  -5.143615  -7.373350 
-0.002500  17.857006  1.439647  8.326936 18.961929  -5.144309  -7.372996 
## Displacement Atom 33 Coordinate 3 (Angstrom), D11 , D12 , D13 , D22 , D23 , D33 
0.002500  17.864755  1.437785  8.332540 18.969877  -5.141742  -7.377622 
0.002000  17.863522  1.437946  8.331904 18.968942  -5.141562  -7.377053 
0.001500  17.861399  1.438240  8.330791 18.967316  -5.141283  -7.376062 
0.001000  17.860324  1.438378  8.330241 18.966505  -5.141111  -7.375569 
0.000750  17.860154  1.438432  8.330092 18.966299  -5.141177  -7.375463 
0.000000  17.858237  1.438637  8.329163 18.964931  -5.140769  -7.374621 
-0.000750  17.856701  1.438798  8.328453 18.963852  -5.140450  -7.373937 
-0.001000  17.856018  1.438930  8.328040 18.963260  -5.140424  -7.373595 
-0.001500  17.854905  1.439072  8.327461 18.962406  -5.140303  -7.373071 
-0.002000  17.853673  1.439233  8.326826 18.961472  -5.140124  -7.372502 
-0.002500  17.852579  1.439452  8.326126 18.960484  -5.140158  -7.371938 
## Displacement Atom 34 Coordinate 1 (Angstrom), D11 , D12 , D13 , D22 , D23 , D33 
0.002500  17.858896  1.438629  8.329496 18.965348  -5.140964  -7.374859 
0.002000  17.858535  1.438620  8.329510 18.965228  -5.140876  -7.374687 
0.001500  17.858545  1.438613  8.329471 18.965219  -5.140866  -7.374707 
0.001000  17.858052  1.438687  8.329105 18.964788  -5.140812  -7.374497 
0.000750  17.858083  1.438679  8.329114 18.964813  -5.140801  -7.374518 
0.000000  17.858237  1.438637  8.329163 18.964931  -5.140769  -7.374621 
-0.000750  17.858267  1.438629  8.329170 18.964957  -5.140736  -7.374648 
-0.001000  17.858297  1.438621  8.329179 18.964981  -5.140725  -7.374670 
-0.001500  17.858600  1.438576  8.329231 18.965154  -5.140809  -7.374823 
-0.002000  17.857951  1.438620  8.329041 18.964782  -5.140671  -7.374526 
-0.002500  17.857844  1.438620  8.328988 18.964717  -5.140638  -7.374488 
## Displacement Atom 34 Coordinate 2 (Angstrom), D11 , D12 , D13 , D22 , D23 , D33 
0.002500  17.858561  1.438902  8.329120 18.964742  -5.141050  -7.374600 
0.002000  17.858360  1.438853  8.329138 18.964736  -5.140972  -7.374533 
0.001500  17.858321  1.438802  8.329143 18.964778  -5.140922  -7.374549 
0.001000  17.858604  1.438706  8.329414 18.965108  -5.140922  -7.374691 
0.000750  17.858554  1.438684  8.329376 18.965096  -5.140893  -7.374691 
0.000000  17.858237  1.438637  8.329163 18.964931  -5.140769  -7.374621 
-0.000750  17.858258  1.438551  8.329147 18.965022  -5.140725  -7.374689 
-0.001000  17.858209  1.438529  8.329109 18.965010  -5.140697  -7.374689 
-0.001500  17.858091  1.438496  8.329174 18.965039  -5.140625  -7.374647 
-0.002000  17.858053  1.438445  8.329179 18.965083  -5.140576  -7.374664 
-0.002500  17.858554  1.438291  8.329568 18.965610  -5.140620  -7.374917 
## Displacement Atom 34 Coordinate 3 (Angstrom), D11 , D12 , D13 , D22 , D23 , D33 
0.002500  17.860556  1.437885  8.331564 18.967748  -5.140983  -7.375673 
0.002000  17.860164  1.438027  8.331123 18.967238  -5.140955  -7.375493 
0.001500  17.859159  1.438270  8.330305 18.966220  -5.140835  -7.375036 
0.001000  17.858769  1.438366  8.330014 18.965828  -5.140788  -7.374851 
0.000750  17.858680  1.438429  8.329826 18.965637  -5.140794  -7.374812 
0.000000  17.858237  1.438637  8.329163 18.964931  -5.140769  -7.374621 
-0.000750  17.858137  1.438805  8.328700 18.964486  -5.140825  -7.374571 
-0.001000  17.858045  1.438868  8.328511 18.964294  -5.140829  -7.374531 
-0.001500  17.857214  1.439031  8.327995 18.963573  -5.140704  -7.374143 
-0.002000  17.856952  1.439160  8.327571 18.963124  -5.140712  -7.374027 
-0.002500  17.856541  1.439301  8.327123 18.962606  -5.140679  -7.373840 
## Displacement Atom 35 Coordinate 1 (Angstrom), D11 , D12 , D13 , D22 , D23 , D33 
0.002500  17.865862  1.437307  8.328541 18.969106  -5.137361  -7.380433 
0.002000  17.864387  1.437565  8.328692 18.968309  -5.138051  -7.379293 
0.001500  17.862819  1.437877  8.328859 18.967423  -5.138908  -7.378032 
0.001000  17.861593  1.438126  8.329160 18.966791  -5.139737  -7.376965 
0.000750  17.860842  1.438242  8.329209 18.966392  -5.140013  -7.376417 
0.000000  17.858237  1.438637  8.329163 18.964931  -5.140769  -7.374621 
-0.000750  17.856315  1.438946  8.329501 18.963990  -5.141664  -7.373119 
-0.001000  17.855558  1.439064  8.329550 18.963588  -5.141940  -7.372567 
-0.001500  17.853844  1.439390  8.329596 18.962586  -5.142686  -7.371274 
-0.002000  17.852456  1.439683  8.329869 18.961839  -5.143584  -7.370088 
-0.002500  17.850938  1.439980  8.330100 18.961021  -5.144446  -7.368847 
## Displacement Atom 35 Coordinate 2 (Angstrom), D11 , D12 , D13 , D22 , D23 , D33 
0.002500  17.870545  1.437002  8.329974 18.971483  -5.141260  -7.381791 
0.002000  17.867914  1.437357  8.329795 18.970074  -5.141141  -7.380260 
0.001500  17.865526  1.437674  8.329655 18.968813  -5.141055  -7.378863 
0.001000  17.863376  1.437969  8.329645 18.967717  -5.141036  -7.377560 
0.000750  17.862176  1.438125  8.329572 18.967085  -5.140986  -7.376862 
0.000000  17.858237  1.438637  8.329163 18.964931  -5.140769  -7.374621 
-0.000750  17.854968  1.439065  8.329133 18.963288  -5.140689  -7.372667 
-0.001000  17.853766  1.439223  8.329059 18.962654  -5.140639  -7.371967 
-0.001500  17.851150  1.439588  8.328807 18.961207  -5.140539  -7.370451 
-0.002000  17.848747  1.439911  8.328665 18.959933  -5.140453  -7.369044 
-0.002500  17.846267  1.440251  8.328576 18.958639  -5.140364  -7.367577 
## Displacement Atom 35 Coordinate 3 (Angstrom), D11 , D12 , D13 , D22 , D23 , D33 
0.002500  17.877292  1.436827  8.332705 18.975499  -5.141670  -7.384854 
0.002000  17.873421  1.437195  8.332010 18.973365  -5.141493  -7.382768 
0.001500  17.869748  1.437537  8.331367 18.971354  -5.141335  -7.380785 
0.001000  17.865871  1.437906  8.330633 18.969199  -5.141141  -7.378709 
0.000750  17.862882  1.438200  8.329941 18.967470  -5.140812  -7.377175 
0.000000  17.858237  1.438637  8.329163 18.964931  -5.140769  -7.374621 
-0.000750  17.853739  1.439067  8.328484 18.962508  -5.140764  -7.372119 
-0.001000  17.851249  1.439288  8.328051 18.961167  -5.140513  -7.370818 
-0.001500  17.847641  1.439626  8.327451 18.959209  -5.140362  -7.368866 
-0.002000  17.843945  1.439981  8.326787 18.957171  -5.140195  -7.366874 
-0.002500  17.840253  1.440334  8.326168 18.955159  -5.140043  -7.364874 
## Displacement Atom 36 Coordinate 1 (Angstrom), D11 , D12 , D13 , D22 , D23 , D33 
0.002500  17.835883  1.440298  8.325684 18.953558  -5.137385  -7.363298 
0.002000  17.840374  1.439960  8.326394 18.955853  -5.138068  -7.365571 
0.001500  17.844159  1.439566  8.326932 18.957887  -5.138249  -7.367652 
0.001000  17.849064  1.439216  8.327510 18.960287  -5.138952  -7.370180 
0.000750  17.851350  1.439074  8.327923 18.961444  -5.139408  -7.371285 
0.000000  17.858237  1.438637  8.329163 18.964931  -5.140769  -7.374621 
-0.000750  17.865045  1.438230  8.330386 18.968358  -5.142133  -7.377903 
-0.001000  17.867324  1.438091  8.330794 18.969507  -5.142585  -7.379005 
-0.001500  17.873032  1.437634  8.331790 18.972504  -5.143422  -7.381900 
-0.002000  17.876175  1.437344  8.331991 18.974051  -5.143479  -7.383689 
-0.002500  17.880632  1.437028  8.332681 18.976305  -5.144148  -7.385945 
## Displacement Atom 36 Coordinate 2 (Angstrom), D11 , D12 , D13 , D22 , D23 , D33 
0.002500  17.855966  1.439469  8.330085 18.963583  -5.142109  -7.372445 
0.002000  17.856444  1.439300  8.329915 18.963871  -5.141845  -7.372890 
0.001500  17.856684  1.439189  8.329856 18.964050  -5.141626  -7.373141 
0.001000  17.856738  1.439033  8.329414 18.964047  -5.141194  -7.373450 
0.000750  17.857145  1.438930  8.329370 18.964293  -5.141096  -7.373756 
0.000000  17.858237  1.438637  8.329163 18.964931  -5.140769  -7.374621 
-0.000750  17.859592  1.438316  8.329112 18.965768  -5.140511  -7.375590 
-0.001000  17.859538  1.438286  8.328920 18.965696  -5.140368  -7.375652 
-0.001500  17.860560  1.437987  8.328900 18.966397  -5.140076  -7.376432 
-0.002000  17.860285  1.437953  8.328571 18.966186  -5.139772  -7.376445 
-0.002500  17.860768  1.437786  8.328405 18.966477  -5.139518  -7.376889 
## Displacement Atom 36 Coordinate 3 (Angstrom), D11 , D12 , D13 , D22 , D23 , D33 
0.002500  17.863060  1.439018  8.333379 18.967931  -5.145547  -7.374912 
0.002000  17.861620  1.438963  8.332233 18.967005  -5.144366  -7.374709 
0.001500  17.860772  1.438884  8.331467 18.966485  -5.143468  -7.374684 
0.001000  17.860134  1.438818  8.330946 18.966124  -5.142759  -7.374663 
0.000750  17.859691  1.438770  8.330519 18.965850  -5.142269  -7.374665 
0.000000  17.858237  1.438637  8.329163 18.964931  -5.140769  -7.374621 
-0.000750  17.857035  1.438477  8.327958 18.964204  -5.139334  -7.374676 
-0.001000  17.856592  1.438429  8.327531 18.963929  -5.138845  -7.374678 
-0.001500  17.855680  1.438407  8.326871 18.963364  -5.138090  -7.374530 
-0.002000  17.854895  1.438267  8.326085 18.962928  -5.137063  -7.374606 
-0.002500  17.853986  1.438183  8.325274 18.962372  -5.136123  -7.374571 
## Displacement Atom 37 Coordinate 1 (Angstrom), D11 , D12 , D13 , D22 , D23 , D33 
0.002500  17.852985  1.439246  8.326405 18.961147  -5.140165  -7.372240 
0.002000  17.854182  1.439092  8.327046 18.962037  -5.140265  -7.372798 
0.001500  17.855512  1.438918  8.327776 18.963039  -5.140345  -7.373423 
0.001000  17.856454  1.438834  8.328296 18.963702  -5.140430  -7.373837 
0.000750  17.857317  1.438713  8.328760 18.964353  -5.140551  -7.374232 
0.000000  17.858237  1.438637  8.329163 18.964931  -5.140769  -7.374621 
-0.000750  17.859844  1.438473  8.329952 18.966033  -5.141126  -7.375307 
-0.001000  17.860134  1.438436  8.330113 18.966253  -5.141142  -7.375442 
-0.001500  17.861812  1.438220  8.331048 18.967524  -5.141276  -7.376219 
-0.002000  17.863221  1.438058  8.331792 18.968546  -5.141442  -7.376857 
-0.002500  17.864355  1.437928  8.332388 18.969363  -5.141589  -7.377367 
## Displacement Atom 37 Coordinate 2 (Angstrom), D11 , D12 , D13 , D22 , D23 , D33 
0.002500  17.867669  1.437880  8.334024 18.971418  -5.143414  -7.378408 
0.002000  17.865653  1.438059  8.333002 18.970019  -5.142884  -7.377577 
0.001500  17.863924  1.438187  8.332111 18.968844  -5.142378  -7.376894 
0.001000  17.862133  1.438360  8.331172 18.967564  -5.141985  -7.376135 
0.000750  17.860627  1.438517  8.330374 18.966477  -5.141636  -7.375499 
0.000000  17.858237  1.438637  8.329163 18.964931  -5.140769  -7.374621 
-0.000750  17.855976  1.438750  8.328043 18.963490  -5.139939  -7.373787 
-0.001000  17.855206  1.438797  8.327632 18.962967  -5.139715  -7.373490 
-0.001500  17.853539  1.438953  8.326758 18.961788  -5.139342  -7.372790 
-0.002000  17.851807  1.439080  8.325865 18.960612  -5.138836  -7.372106 
-0.002500  17.849928  1.439236  8.324911 18.959319  -5.138332  -7.371340 
## Displacement Atom 37 Coordinate 3 (Angstrom), D11 , D12 , D13 , D22 , D23 , D33 
0.002500  17.872877  1.436476  8.334759 18.975165  -5.144554  -7.381475 
0.002000  17.869696  1.436978  8.333534 18.972892  -5.143826  -7.379945 
0.001500  17.866332  1.437402  8.332216 18.970611  -5.142807  -7.378451 
0.001000  17.863031  1.437925  8.330932 18.968249  -5.142064  -7.376864 
0.000750  17.861669  1.438067  8.330439 18.967381  -5.141573  -7.376286 
0.000000  17.858237  1.438637  8.329163 18.964931  -5.140769  -7.374621 
-0.000750  17.855497  1.439117  8.328276 18.963012  -5.140105  -7.373256 
-0.001000  17.853600  1.439334  8.327501 18.961745  -5.139515  -7.372437 
-0.001500  17.850824  1.439771  8.326498 18.959795  -5.138861  -7.371096 
-0.002000  17.847172  1.440251  8.325060 18.957288  -5.137857  -7.369439 
-0.002500  17.844286  1.440666  8.323969 18.955289  -5.137107  -7.368092 
## Displacement Atom 38 Coordinate 1 (Angstrom), D11 , D12 , D13 , D22 , D23 , D33 
0.002500  17.859363  1.438340  8.329005 18.965592  -5.140876  -7.375383 
0.002000  17.859143  1.438397  8.329029 18.965459  -5.140875  -7.375230 
0.001500  17.858938  1.438456  8.329077 18.965344  -5.140855  -7.375086 
0.001000  17.859050  1.438467  8.329267 18.965457  -5.140892  -7.375090 
0.000750  17.858940  1.438497  8.329293 18.965397  -5.140880  -7.375014 
0.000000  17.858237  1.438637  8.329163 18.964931  -5.140769  -7.374621 
-0.000750  17.858285  1.438679  8.329452 18.965038  -5.140809  -7.374554 
-0.001000  17.858177  1.438709  8.329480 18.964978  -5.140797  -7.374477 
-0.001500  17.857705  1.438807  8.329361 18.964651  -5.140729  -7.374217 
-0.002000  17.857498  1.438865  8.329408 18.964535  -5.140708  -7.374072 
-0.002500  17.857411  1.438905  8.329503 18.964505  -5.140729  -7.373980 
## Displacement Atom 38 Coordinate 2 (Angstrom), D11 , D12 , D13 , D22 , D23 , D33 
0.002500  17.856428  1.439051  8.328335 18.963401  -5.140881  -7.373580 
0.002000  17.856877  1.438956  8.328549 18.963775  -5.140874  -7.373827 
0.001500  17.856802  1.438893  8.328522 18.963823  -5.140639  -7.373884 
0.001000  17.857579  1.438772  8.328921 18.964424  -5.140724  -7.374259 
0.000750  17.857838  1.438726  8.329035 18.964623  -5.140754  -7.374390 
0.000000  17.858237  1.438637  8.329163 18.964931  -5.140769  -7.374621 
-0.000750  17.859400  1.438449  8.329718 18.965822  -5.140937  -7.375183 
-0.001000  17.859660  1.438403  8.329831 18.966021  -5.140967  -7.375315 
-0.001500  17.859869  1.438365  8.329931 18.966193  -5.140950  -7.375431 
-0.002000  17.860482  1.438198  8.330266 18.966769  -5.140830  -7.375806 
-0.002500  17.860623  1.438153  8.330364 18.966928  -5.140711  -7.375915 
## Displacement Atom 38 Coordinate 3 (Angstrom), D11 , D12 , D13 , D22 , D23 , D33 
0.002500  17.851548  1.438897  8.326148 18.960926  -5.137729  -7.372283 
0.002000  17.852902  1.438885  8.326754 18.961687  -5.138445  -7.372712 
0.001500  17.854341  1.438809  8.327415 18.962581  -5.139044  -7.373236 
0.001000  17.855718  1.438756  8.328032 18.963403  -5.139673  -7.373717 
0.000750  17.856355  1.438777  8.328307 18.963720  -5.140084  -7.373888 
0.000000  17.858237  1.438637  8.329163 18.964931  -5.140769  -7.374621 
-0.000750  17.860293  1.438483  8.330133 18.966281  -5.141500  -7.375418 
-0.001000  17.861433  1.438427  8.330669 18.966992  -5.141987  -7.375826 
-0.001500  17.862988  1.438350  8.331384 18.967953  -5.142648  -7.376387 
-0.002000  17.864430  1.438273  8.332047 18.968850  -5.143248  -7.376913 
-0.002500  17.865874  1.438195  8.332711 18.969749  -5.143849  -7.377440 
## Displacement Atom 39 Coordinate 1 (Angstrom), D11 , D12 , D13 , D22 , D23 , D33 
0.002500  17.858647  1.438624  8.329354 18.965182  -5.140993  -7.374752 
0.002000  17.858822  1.438588  8.329458 18.965329  -5.140995  -7.374842 
0.001500  17.858782  1.438586  8.329443 18.965311  -5.140959  -7.374833 
0.001000  17.858268  1.438655  8.329187 18.964937  -5.140833  -7.374608 
0.000750  17.858504  1.438614  8.329312 18.965121  -5.140856  -7.374722 
0.000000  17.858237  1.438637  8.329163 18.964931  -5.140769  -7.374621 
-0.000750  17.858359  1.438614  8.329237 18.965035  -5.140771  -7.374681 
-0.001000  17.858060  1.438655  8.329087 18.964818  -5.140700  -7.374549 
-0.001500  17.858554  1.438574  8.329361 18.965208  -5.140749  -7.374785 
-0.002000  17.858518  1.438572  8.329348 18.965192  -5.140714  -7.374778 
-0.002500  17.858116  1.438621  8.329145 18.964904  -5.140612  -7.374605 
## Displacement Atom 39 Coordinate 2 (Angstrom), D11 , D12 , D13 , D22 , D23 , D33 
0.002500  17.858734  1.438555  8.329663 18.965449  -5.140663  -7.374851 
0.002000  17.858707  1.438562  8.329604 18.965401  -5.140699  -7.374836 
0.001500  17.858680  1.438569  8.329544 18.965352  -5.140735  -7.374821 
0.001000  17.858201  1.438644  8.329234 18.964954  -5.140706  -7.374599 
0.000750  17.858194  1.438646  8.329211 18.964936  -5.140722  -7.374595 
0.000000  17.858237  1.438637  8.329163 18.964931  -5.140769  -7.374621 
-0.000750  17.858148  1.438662  8.329070 18.964828  -5.140814  -7.374568 
-0.001000  17.858140  1.438665  8.329047 18.964810  -5.140829  -7.374564 
-0.001500  17.858521  1.438611  8.329189 18.965064  -5.140950  -7.374735 
-0.002000  17.858495  1.438618  8.329130 18.965016  -5.140986  -7.374720 
-0.002500  17.858469  1.438625  8.329071 18.964968  -5.141022  -7.374706 
## Displacement Atom 39 Coordinate 3 (Angstrom), D11 , D12 , D13 , D22 , D23 , D33 
0.002500  17.859341  1.438530  8.329654 18.965666  -5.141165  -7.375066 
0.002000  17.858676  1.438612  8.329328 18.965192  -5.140996  -7.374778 
0.001500  17.858552  1.438622  8.329282 18.965116  -5.140939  -7.374730 
0.001000  17.858560  1.438613  8.329309 18.965138  -5.140913  -7.374739 
0.000750  17.858526  1.438613  8.329299 18.965121  -5.140888  -7.374729 
0.000000  17.858237  1.438637  8.329163 18.964931  -5.140769  -7.374621 
-0.000750  17.858322  1.438617  8.329243 18.965024  -5.140737  -7.374668 
-0.001000  17.858288  1.438618  8.329233 18.965008  -5.140711  -7.374657 
-0.001500  17.857804  1.438684  8.329006 18.964659  -5.140599  -7.374439 
-0.002000  17.857678  1.438695  8.328959 18.964582  -5.140542  -7.374390 
-0.002500  17.857840  1.438653  8.329068 18.964734  -5.140516  -7.374482 
## Displacement Atom 40 Coordinate 1 (Angstrom), D11 , D12 , D13 , D22 , D23 , D33 
0.002500  17.853256  1.438928  8.324767 18.960658  -5.138754  -7.373203 
0.002000  17.854227  1.438875  8.325638 18.961495  -5.139163  -7.373471 
0.001500  17.855235  1.438786  8.326587 18.962424  -5.139534  -7.373770 
0.001000  17.856173  1.438759  8.327501 18.963241  -5.139981  -7.373988 
0.000750  17.856904  1.438690  8.328096 18.963867  -5.140212  -7.374235 
0.000000  17.858237  1.438637  8.329163 18.964931  -5.140769  -7.374621 
-0.000750  17.860246  1.438497  8.330609 18.966511  -5.141463  -7.375299 
-0.001000  17.860499  1.438497  8.330948 18.966777  -5.141607  -7.375331 
-0.001500  17.861575  1.438431  8.331805 18.967657  -5.142011  -7.375665 
-0.002000  17.863055  1.438324  8.333037 18.968906  -5.142568  -7.376122 
-0.002500  17.864041  1.438222  8.333983 18.969850  -5.142930  -7.376420 
## Displacement Atom 40 Coordinate 2 (Angstrom), D11 , D12 , D13 , D22 , D23 , D33 
0.002500  17.847957  1.439267  8.313147 18.953118  -5.137728  -7.372962 
0.002000  17.850179  1.439164  8.316653 18.955654  -5.138427  -7.373284 
0.001500  17.852329  1.439074  8.320101 18.958122  -5.139121  -7.373575 
0.001000  17.854660  1.438933  8.323480 18.960678  -5.139813  -7.374004 
0.000750  17.855644  1.438848  8.324951 18.961808  -5.140070  -7.374196 
0.000000  17.858237  1.438637  8.329163 18.964931  -5.140769  -7.374621 
-0.000750  17.861523  1.438333  8.333764 18.968587  -5.141611  -7.375346 
-0.001000  17.862499  1.438246  8.335231 18.969716  -5.141867  -7.375537 
-0.001500  17.864299  1.438171  8.338323 18.971883  -5.142465  -7.375733 
-0.002000  17.866639  1.438036  8.341863 18.974514  -5.143194  -7.376121 
-0.002500  17.869029  1.437882  8.345440 18.977200  -5.143924  -7.376537 
## Displacement Atom 40 Coordinate 3 (Angstrom), D11 , D12 , D13 , D22 , D23 , D33 
0.002500  17.861646  1.437090  8.337067 18.971712  -5.140058  -7.375737 
0.002000  17.860916  1.437402  8.335390 18.970291  -5.140180  -7.375512 
0.001500  17.860373  1.437696  8.333904 18.969047  -5.140352  -7.375344 
0.001000  17.860081  1.438024  8.332407 18.967839  -5.140686  -7.375255 
0.000750  17.859680  1.438252  8.331663 18.967076  -5.140828  -7.375046 
0.000000  17.858237  1.438637  8.329163 18.964931  -5.140769  -7.374621 
-0.000750  17.856981  1.439005  8.326783 18.962936  -5.140760  -7.374267 
-0.001000  17.857238  1.439133  8.326383 18.962680  -5.141012  -7.374363 
-0.001500  17.856968  1.439448  8.324890 18.961507  -5.141341  -7.374295 
-0.002000  17.856374  1.439739  8.323371 18.960237  -5.141499  -7.374112 
-0.002500  17.855784  1.440013  8.321756 18.958942  -5.141639  -7.373965 
## Displacement Atom 41 Coordinate 1 (Angstrom), D11 , D12 , D13 , D22 , D23 , D33 
0.002500  17.865966  1.437553  8.334959 18.971729  -5.141982  -7.377815 
0.002000  17.865269  1.437627  8.334095 18.970976  -5.141818  -7.377625 
0.001500  17.863609  1.437868  8.332919 18.969539  -5.141576  -7.376915 
0.001000  17.861250  1.438198  8.331278 18.967538  -5.141205  -7.375915 
0.000750  17.860773  1.438247  8.330805 18.967080  -5.141087  -7.375761 
0.000000  17.858237  1.438637  8.329163 18.964931  -5.140769  -7.374621 
-0.000750  17.855965  1.438997  8.327674 18.962982  -5.140517  -7.373588 
-0.001000  17.855167  1.439096  8.327037 18.962284  -5.140344  -7.373286 
-0.001500  17.853582  1.439305  8.325793 18.960872  -5.140105  -7.372646 
-0.002000  17.851898  1.439543  8.324593 18.959419  -5.139856  -7.371932 
-0.002500  17.850613  1.439694  8.323400 18.958224  -5.139583  -7.371484 
## Displacement Atom 41 Coordinate 2 (Angstrom), D11 , D12 , D13 , D22 , D23 , D33 
0.002500  17.863506  1.436906  8.339732 18.973775  -5.140288  -7.376191 
0.002000  17.862490  1.437253  8.337641 18.972029  -5.140393  -7.375889 
0.001500  17.861258  1.437418  8.335405 18.970358  -5.140153  -7.375681 
0.001000  17.859792  1.437869  8.332673 18.968035  -5.140257  -7.375223 
0.000750  17.859400  1.438065  8.331797 18.967255  -5.140387  -7.375068 
0.000000  17.858237  1.438637  8.329163 18.964931  -5.140769  -7.374621 
-0.000750  17.856995  1.439232  8.326512 18.962555  -5.141157  -7.374122 
-0.001000  17.856586  1.439425  8.325627 18.961768  -5.141284  -7.373962 
-0.001500  17.855848  1.439753  8.323283 18.960018  -5.141510  -7.373846 
-0.002000  17.854012  1.439993  8.320725 18.957910  -5.141159  -7.373372 
-0.002500  17.852908  1.440330  8.318588 18.956127  -5.141245  -7.373044 
## Displacement Atom 41 Coordinate 3 (Angstrom), D11 , D12 , D13 , D22 , D23 , D33 
0.002500  17.854522  1.437546  8.323582 18.962200  -5.138500  -7.374918 
0.002000  17.855322  1.437757  8.324730 18.962790  -5.138966  -7.374883 
0.001500  17.855826  1.438038  8.325775 18.963145  -5.139395  -7.374683 
0.001000  17.856519  1.438178  8.326502 18.963584  -5.139773  -7.374740 
0.000750  17.856983  1.438289  8.327188 18.963947  -5.140031  -7.374724 
0.000000  17.858237  1.438637  8.329163 18.964931  -5.140769  -7.374621 
-0.000750  17.859771  1.438956  8.331305 18.966127  -5.141576  -7.374629 
-0.001000  17.860237  1.439067  8.331993 18.966491  -5.141834  -7.374614 
-0.001500  17.860621  1.439257  8.332565 18.966699  -5.142158  -7.374527 
-0.002000  17.861736  1.439449  8.333933 18.967519  -5.142690  -7.374606 
-0.002500  17.862540  1.439662  8.335087 18.968112  -5.143155  -7.374572 
## Displacement Atom 42 Coordinate 1 (Angstrom), D11 , D12 , D13 , D22 , D23 , D33 
0.002500  17.859132  1.437938  8.327528 18.965324  -5.140407  -7.375908 
0.002000  17.859034  1.438067  8.327900 18.965309  -5.140494  -7.375686 
0.001500  17.858904  1.438227  8.328337 18.965274  -5.140610  -7.375410 
0.001000  17.858620  1.438473  8.328872 18.965129  -5.140787  -7.374970 
0.000750  17.858863  1.438472  8.329141 18.965335  -5.140864  -7.375024 
0.000000  17.858237  1.438637  8.329163 18.964931  -5.140769  -7.374621 
-0.000750  17.858387  1.438700  8.329618 18.965119  -5.140829  -7.374555 
-0.001000  17.858075  1.438781  8.329592 18.964907  -5.140805  -7.374357 
-0.001500  17.858296  1.438949  8.330385 18.965154  -5.141061  -7.374155 
-0.002000  17.858231  1.439102  8.330859 18.965174  -5.141187  -7.373908 
-0.002500  17.858319  1.439242  8.331473 18.965321  -5.141349  -7.373710 
## Displacement Atom 42 Coordinate 2 (Angstrom), D11 , D12 , D13 , D22 , D23 , D33 
0.002500  17.857291  1.438748  8.328743 18.964260  -5.140965  -7.374092 
0.002000  17.857493  1.438725  8.328835 18.964404  -5.140930  -7.374202 
0.001500  17.857694  1.438702  8.328928 18.964549  -5.140894  -7.374312 
0.001000  17.858194  1.438631  8.329173 18.964919  -5.140906  -7.374562 
0.000750  17.858306  1.438620  8.329226 18.964999  -5.140892  -7.374621 
0.000000  17.858237  1.438637  8.329163 18.964931  -5.140769  -7.374621 
-0.000750  17.858982  1.438548  8.329552 18.965483  -5.140808  -7.374975 
-0.001000  17.859096  1.438536  8.329607 18.965565  -5.140794  -7.375035 
-0.001500  17.858909  1.438566  8.329488 18.965417  -5.140683  -7.374974 
-0.002000  17.859113  1.438543  8.329582 18.965562  -5.140648  -7.375084 
-0.002500  17.859317  1.438520  8.329676 18.965708  -5.140613  -7.375195 
## Displacement Atom 42 Coordinate 3 (Angstrom), D11 , D12 , D13 , D22 , D23 , D33 
0.002500  17.864135  1.438844  8.332606 18.968380  -5.143073  -7.376390 
0.002000  17.863036  1.438792  8.331962 18.967753  -5.142627  -7.376071 
0.001500  17.861979  1.438730  8.331290 18.967137  -5.142187  -7.375785 
0.001000  17.860758  1.438686  8.330539 18.966406  -5.141727  -7.375423 
0.000750  17.860385  1.438640  8.330348 18.966235  -5.141547  -7.375330 
0.000000  17.858237  1.438637  8.329163 18.964931  -5.140769  -7.374621 
-0.000750  17.856851  1.438536  8.328403 18.964208  -5.140144  -7.374242 
-0.001000  17.856018  1.438557  8.327968 18.963690  -5.139880  -7.373941 
-0.001500  17.855150  1.438459  8.327400 18.963236  -5.139473  -7.373745 
-0.002000  17.854209  1.438384  8.326792 18.962711  -5.139051  -7.373511 
-0.002500  17.853102  1.438334  8.326144 18.962078  -5.138604  -7.373189 
## Displacement Atom 43 Coordinate 1 (Angstrom), D11 , D12 , D13 , D22 , D23 , D33 
0.002500  17.858857  1.438714  8.329852 18.965369  -5.141245  -7.374647 
0.002000  17.858806  1.438690  8.329755 18.965337  -5.141165  -7.374673 
0.001500  17.858329  1.438716  8.329400 18.964980  -5.140977  -7.374526 
0.001000  17.858279  1.438695  8.329315 18.964950  -5.140908  -7.374546 
0.000750  17.858434  1.438646  8.329369 18.965083  -5.140891  -7.374647 
0.000000  17.858237  1.438637  8.329163 18.964931  -5.140769  -7.374621 
-0.000750  17.858415  1.438584  8.329172 18.965063  -5.140734  -7.374750 
-0.001000  17.858084  1.438610  8.328976 18.964830  -5.140631  -7.374627 
-0.001500  17.858035  1.438589  8.328891 18.964800  -5.140562  -7.374647 
-0.002000  17.858408  1.438489  8.328984 18.965089  -5.140522  -7.374889 
-0.002500  17.858360  1.438464  8.328888 18.965059  -5.140442  -7.374917 
## Displacement Atom 43 Coordinate 2 (Angstrom), D11 , D12 , D13 , D22 , D23 , D33 
0.002500  17.858509  1.438609  8.329349 18.965152  -5.140756  -7.374745 
0.002000  17.858810  1.438562  8.329499 18.965376  -5.140824  -7.374881 
0.001500  17.858786  1.438565  8.329481 18.965356  -5.140834  -7.374868 
0.001000  17.858183  1.438655  8.329160 18.964896  -5.140746  -7.374589 
0.000750  17.858441  1.438613  8.329287 18.965089  -5.140798  -7.374708 
0.000000  17.858237  1.438637  8.329163 18.964931  -5.140769  -7.374621 
-0.000750  17.858428  1.438614  8.329265 18.965072  -5.140831  -7.374698 
-0.001000  17.858089  1.438665  8.329085 18.964815  -5.140776  -7.374542 
-0.001500  17.858665  1.438578  8.329383 18.965250  -5.140894  -7.374803 
-0.002000  17.858649  1.438579  8.329369 18.965236  -5.140905  -7.374794 
-0.002500  17.858217  1.438640  8.329131 18.964907  -5.140841  -7.374597 
## Displacement Atom 43 Coordinate 3 (Angstrom), D11 , D12 , D13 , D22 , D23 , D33 
0.002500  17.857806  1.438623  8.329029 18.964733  -5.140642  -7.374456 
0.002000  17.857961  1.438617  8.329094 18.964824  -5.140681  -7.374518 
0.001500  17.857804  1.438665  8.328972 18.964662  -5.140664  -7.374440 
0.001000  17.857928  1.438661  8.329029 18.964737  -5.140699  -7.374488 
0.000750  17.858335  1.438613  8.329216 18.965019  -5.140777  -7.374672 
0.000000  17.858237  1.438637  8.329163 18.964931  -5.140769  -7.374621 
-0.000750  17.858522  1.438616  8.329330 18.965133  -5.140849  -7.374728 
-0.001000  17.858426  1.438645  8.329258 18.965037  -5.140839  -7.374681 
-0.001500  17.858550  1.438641  8.329315 18.965112  -5.140873  -7.374729 
-0.002000  17.859201  1.438569  8.329617 18.965561  -5.140996  -7.375021 
-0.002500  17.859357  1.438563  8.329683 18.965654  -5.141035  -7.375084 
## Displacement Atom 44 Coordinate 1 (Angstrom), D11 , D12 , D13 , D22 , D23 , D33 
0.002500  17.858904  1.438940  8.329133 18.964789  -5.141070  -7.374758 
0.002000  17.858792  1.438880  8.329227 18.964863  -5.141001  -7.374724 
0.001500  17.858691  1.438816  8.329234 18.964909  -5.140952  -7.374713 
0.001000  17.858884  1.438719  8.329422 18.965176  -5.140960  -7.374824 
0.000750  17.858817  1.438686  8.329410 18.965187  -5.140931  -7.374814 
0.000000  17.858237  1.438637  8.329163 18.964931  -5.140769  -7.374621 
-0.000750  17.858416  1.438489  8.329340 18.965254  -5.140758  -7.374757 
-0.001000  17.858349  1.438456  8.329328 18.965265  -5.140729  -7.374747 
-0.001500  17.858071  1.438428  8.329268 18.965178  -5.140652  -7.374645 
-0.002000  17.857966  1.438364  8.329273 18.965222  -5.140602  -7.374633 
-0.002500  17.857827  1.438309  8.329357 18.965281  -5.140524  -7.374587 
## Displacement Atom 44 Coordinate 2 (Angstrom), D11 , D12 , D13 , D22 , D23 , D33 
0.002500  17.860867  1.438509  8.329444 18.966139  -5.142419  -7.375645 
0.002000  17.860422  1.438524  8.329432 18.965961  -5.142105  -7.375477 
0.001500  17.860081  1.438543  8.329628 18.965899  -5.141796  -7.375312 
0.001000  17.859060  1.438639  8.329426 18.965339  -5.141310  -7.374875 
0.000750  17.859194  1.438597  8.329568 18.965496  -5.141249  -7.374951 
0.000000  17.858237  1.438637  8.329163 18.964931  -5.140769  -7.374621 
-0.000750  17.858060  1.438575  8.329193 18.964961  -5.140444  -7.374629 
-0.001000  17.857626  1.438617  8.329034 18.964690  -5.140280  -7.374448 
-0.001500  17.857458  1.438584  8.329279 18.964782  -5.139940  -7.374403 
-0.002000  17.856839  1.438646  8.329331 18.964519  -5.139577  -7.374114 
-0.002500  17.856388  1.438662  8.329318 18.964338  -5.139260  -7.373943 
## Displacement Atom 44 Coordinate 3 (Angstrom), D11 , D12 , D13 , D22 , D23 , D33 
0.002500  17.859821  1.437877  8.328219 18.965987  -5.141156  -7.375981 
0.002000  17.859588  1.438018  8.328455 18.965842  -5.141094  -7.375746 
0.001500  17.859165  1.438170  8.328655 18.965599  -5.140962  -7.375427 
0.001000  17.859216  1.438271  8.329027 18.965657  -5.140952  -7.375323 
0.000750  17.858410  1.438430  8.328874 18.965115  -5.140752  -7.374888 
0.000000  17.858237  1.438637  8.329163 18.964931  -5.140769  -7.374621 
-0.000750  17.858552  1.438783  8.329748 18.965131  -5.140888  -7.374557 
-0.001000  17.858269  1.438889  8.329713 18.964891  -5.140856  -7.374366 
-0.001500  17.858009  1.439012  8.330054 18.964809  -5.140706  -7.374125 
-0.002000  17.857702  1.439149  8.330317 18.964658  -5.140593  -7.373859 
-0.002500  17.857464  1.439290  8.330547 18.964508  -5.140530  -7.373623 
## Displacement Atom 45 Coordinate 1 (Angstrom), D11 , D12 , D13 , D22 , D23 , D33 
0.002500  17.858459  1.438639  8.329616 18.965222  -5.140882  -7.374614 
0.002000  17.858695  1.438596  8.329672 18.965378  -5.140907  -7.374745 
0.001500  17.858680  1.438593  8.329601 18.965342  -5.140892  -7.374757 
0.001000  17.858170  1.438662  8.329241 18.964920  -5.140789  -7.374550 
0.000750  17.858467  1.438617  8.329354 18.965125  -5.140836  -7.374697 
0.000000  17.858237  1.438637  8.329163 18.964931  -5.140769  -7.374621 
-0.000750  17.858397  1.438611  8.329196 18.965032  -5.140792  -7.374707 
-0.001000  17.858155  1.438649  8.329031 18.964831  -5.140743  -7.374605 
-0.001500  17.858604  1.438575  8.329176 18.965137  -5.140806  -7.374837 
-0.002000  17.858592  1.438571  8.329106 18.965104  -5.140792  -7.374851 
-0.002500  17.858384  1.438593  8.328928 18.964926  -5.140736  -7.374780 
## Displacement Atom 45 Coordinate 2 (Angstrom), D11 , D12 , D13 , D22 , D23 , D33 
0.002500  17.858708  1.438658  8.329906 18.965411  -5.140854  -7.374680 
0.002000  17.858689  1.438644  8.329799 18.965372  -5.140852  -7.374700 
0.001500  17.858220  1.438691  8.329403 18.964976  -5.140770  -7.374531 
0.001000  17.858206  1.438678  8.329317 18.964946  -5.140769  -7.374549 
0.000750  17.858437  1.438627  8.329387 18.965117  -5.140805  -7.374676 
0.000000  17.858237  1.438637  8.329163 18.964931  -5.140769  -7.374621 
-0.000750  17.858416  1.438603  8.329157 18.965032  -5.140821  -7.374723 
-0.001000  17.858148  1.438629  8.328970 18.964827  -5.140768  -7.374620 
-0.001500  17.858133  1.438616  8.328884 18.964797  -5.140767  -7.374637 
-0.002000  17.858541  1.438532  8.328949 18.965066  -5.140837  -7.374869 
-0.002500  17.858523  1.438518  8.328843 18.965028  -5.140835  -7.374891 
## Displacement Atom 45 Coordinate 3 (Angstrom), D11 , D12 , D13 , D22 , D23 , D33 
0.002500  17.858730  1.438666  8.329563 18.965252  -5.140927  -7.374746 
0.002000  17.858700  1.438651  8.329522 18.965240  -5.140909  -7.374750 
0.001500  17.858265  1.438691  8.329275 18.964933  -5.140819  -7.374571 
0.001000  17.858236  1.438678  8.329232 18.964918  -5.140802  -7.374576 
0.000750  17.858458  1.438626  8.329347 18.965107  -5.140826  -7.374691 
0.000000  17.858237  1.438637  8.329163 18.964931  -5.140769  -7.374621 
-0.000750  17.858397  1.438604  8.329198 18.965043  -5.140800  -7.374708 
-0.001000  17.858120  1.438628  8.329057 18.964857  -5.140735  -7.374594 
-0.001500  17.858091  1.438616  8.329013 18.964842  -5.140719  -7.374598 
-0.002000  17.858465  1.438534  8.329194 18.965149  -5.140769  -7.374790 
-0.002500  17.858437  1.438519  8.329153 18.965139  -5.140752  -7.374795 
## Displacement Atom 46 Coordinate 1 (Angstrom), D11 , D12 , D13 , D22 , D23 , D33 
0.002500  17.859601  1.438416  8.333276 18.967616  -5.140645  -7.374617 
0.002000  17.859228  1.438478  8.332377 18.966986  -5.140642  -7.374577 
0.001500  17.859014  1.438515  8.331594 18.966498  -5.140682  -7.374601 
0.001000  17.859043  1.438520  8.330931 18.966182  -5.140758  -7.374737 
0.000750  17.858932  1.438538  8.330539 18.965939  -5.140779  -7.374747 
0.000000  17.858237  1.438637  8.329163 18.964931  -5.140769  -7.374621 
-0.000750  17.858273  1.438642  8.328196 18.964481  -5.140906  -7.374811 
-0.001000  17.858164  1.438659  8.327806 18.964239  -5.140927  -7.374822 
-0.001500  17.857717  1.438733  8.326893 18.963569  -5.140916  -7.374743 
-0.002000  17.857499  1.438769  8.326109 18.963080  -5.140954  -7.374766 
-0.002500  17.857169  1.438823  8.325241 18.962490  -5.140955  -7.374746 
## Displacement Atom 46 Coordinate 2 (Angstrom), D11 , D12 , D13 , D22 , D23 , D33 
0.002500  17.866776  1.438765  8.336839 18.971373  -5.144560  -7.376587 
0.002000  17.865159  1.438728  8.335354 18.970156  -5.143818  -7.376234 
0.001500  17.863294  1.438714  8.333785 18.968784  -5.142992  -7.375774 
0.001000  17.861164  1.438716  8.332037 18.967213  -5.142050  -7.375227 
0.000750  17.860720  1.438652  8.331463 18.966858  -5.141770  -7.375212 
0.000000  17.858237  1.438637  8.329163 18.964931  -5.140769  -7.374621 
-0.000750  17.856531  1.438521  8.327296 18.963595  -5.139924  -7.374367 
-0.001000  17.855508  1.438541  8.326415 18.962805  -5.139539  -7.374089 
-0.001500  17.854017  1.438454  8.324950 18.961695  -5.138752  -7.373835 
-0.002000  17.852212  1.438425  8.323460 18.960404  -5.137888  -7.373409 
-0.002500  17.850593  1.438386  8.321971 18.959185  -5.137147  -7.373056 
## Displacement Atom 46 Coordinate 3 (Angstrom), D11 , D12 , D13 , D22 , D23 , D33 
0.002500  17.862447  1.438963  8.329575 18.966187  -5.143371  -7.375997 
0.002000  17.861518  1.438897  8.329500 18.965913  -5.142804  -7.375685 
0.001500  17.860811  1.438817  8.329478 18.965756  -5.142317  -7.375469 
0.001000  17.860018  1.438710  8.329453 18.965592  -5.141755  -7.375238 
0.000750  17.859092  1.438704  8.329226 18.965178  -5.141321  -7.374898 
0.000000  17.858237  1.438637  8.329163 18.964931  -5.140769  -7.374621 
-0.000750  17.857924  1.438521  8.329395 18.965073  -5.140350  -7.374564 
-0.001000  17.857505  1.438421  8.329444 18.965074  -5.139978  -7.374470 
-0.001500  17.856541  1.438339  8.329331 18.964794  -5.139378  -7.374165 
-0.002000  17.855826  1.438260  8.329305 18.964631  -5.138886  -7.373946 
-0.002500  17.855191  1.438145  8.329380 18.964585  -5.138366  -7.373774 
## Displacement Atom 47 Coordinate 1 (Angstrom), D11 , D12 , D13 , D22 , D23 , D33 
0.002500  17.858200  1.438668  8.329435 18.965006  -5.140824  -7.374512 
0.002000  17.858572  1.438617  8.329589 18.965265  -5.140888  -7.374689 
0.001500  17.858591  1.438609  8.329540 18.965260  -5.140878  -7.374717 
0.001000  17.858137  1.438664  8.329263 18.964915  -5.140778  -7.374529 
0.000750  17.858432  1.438618  8.329395 18.965130  -5.140822  -7.374672 
0.000000  17.858237  1.438637  8.329163 18.964931  -5.140769  -7.374621 
-0.000750  17.858415  1.438612  8.329146 18.965015  -5.140803  -7.374724 
-0.001000  17.858201  1.438645  8.329017 18.964847  -5.140756  -7.374632 
-0.001500  17.858717  1.438556  8.329250 18.965238  -5.140824  -7.374888 
-0.002000  17.858740  1.438546  8.329204 18.965236  -5.140815  -7.374918 
-0.002500  17.858569  1.438575  8.329072 18.965088  -5.140780  -7.374849 
## Displacement Atom 47 Coordinate 2 (Angstrom), D11 , D12 , D13 , D22 , D23 , D33 
0.002500  17.859451  1.438468  8.329586 18.965759  -5.140891  -7.375241 
0.002000  17.859288  1.438491  8.329546 18.965654  -5.140882  -7.375151 
0.001500  17.858633  1.438572  8.329326 18.965233  -5.140770  -7.374833 
0.001000  17.858482  1.438599  8.329266 18.965118  -5.140770  -7.374750 
0.000750  17.858615  1.438570  8.329389 18.965251  -5.140790  -7.374804 
0.000000  17.858237  1.438637  8.329163 18.964931  -5.140769  -7.374621 
-0.000750  17.858234  1.438660  8.329153 18.964895  -5.140835  -7.374592 
-0.001000  17.857875  1.438707  8.329023 18.964658  -5.140768  -7.374420 
-0.001500  17.857723  1.438734  8.328961 18.964542  -5.140768  -7.374337 
-0.002000  17.857981  1.438678  8.329222 18.964814  -5.140813  -7.374436 
-0.002500  17.857817  1.438701  8.329182 18.964709  -5.140805  -7.374347 
## Displacement Atom 47 Coordinate 3 (Angstrom), D11 , D12 , D13 , D22 , D23 , D33 
0.002500  17.858315  1.438445  8.329748 18.965474  -5.140547  -7.374691 
0.002000  17.858376  1.438474  8.329673 18.965423  -5.140607  -7.374711 
0.001500  17.858028  1.438582  8.329324 18.965012  -5.140620  -7.374540 
0.001000  17.858082  1.438605  8.329266 18.964973  -5.140670  -7.374557 
0.000750  17.858323  1.438583  8.329347 18.965116  -5.140725  -7.374666 
0.000000  17.858237  1.438637  8.329163 18.964931  -5.140769  -7.374621 
-0.000750  17.858508  1.438650  8.329186 18.965017  -5.140897  -7.374723 
-0.001000  17.858296  1.438698  8.329034 18.964819  -5.140871  -7.374623 
-0.001500  17.858350  1.438721  8.328976 18.964781  -5.140922  -7.374640 
-0.002000  17.858872  1.438700  8.329086 18.965030  -5.141085  -7.374867 
-0.002500  17.858935  1.438728  8.329014 18.964981  -5.141145  -7.374887 
## Displacement Atom 48 Coordinate 1 (Angstrom), D11 , D12 , D13 , D22 , D23 , D33 
0.002500  17.857243  1.438670  8.328551 18.964268  -5.140061  -7.374372 
0.002000  17.857500  1.438662  8.328637 18.964405  -5.140250  -7.374450 
0.001500  17.857835  1.438657  8.328686 18.964548  -5.140497  -7.374562 
0.001000  17.858314  1.438604  8.329010 18.964925  -5.140661  -7.374737 
0.000750  17.858393  1.438600  8.329103 18.965001  -5.140707  -7.374751 
0.000000  17.858237  1.438637  8.329163 18.964931  -5.140769  -7.374621 
-0.000750  17.858870  1.438571  8.329663 18.965462  -5.140988  -7.374834 
-0.001000  17.858707  1.438604  8.329607 18.965345  -5.140998  -7.374739 
-0.001500  17.859432  1.438525  8.329977 18.965861  -5.141254  -7.375029 
-0.002000  17.859568  1.438532  8.330021 18.965926  -5.141400  -7.375055 
-0.002500  17.860025  1.438496  8.330215 18.966220  -5.141622  -7.375224 
## Displacement Atom 48 Coordinate 2 (Angstrom), D11 , D12 , D13 , D22 , D23 , D33 
0.002500  17.854587  1.438468  8.329725 18.964138  -5.138869  -7.373085 
0.002000  17.855406  1.438490  8.329662 18.964366  -5.139265  -7.373431 
0.001500  17.856192  1.438531  8.329501 18.964513  -5.139694  -7.373763 
0.001000  17.857437  1.438498  8.329681 18.965062  -5.140188  -7.374291 
0.000750  17.857526  1.438603  8.329321 18.964804  -5.140424  -7.374305 
0.000000  17.858237  1.438637  8.329163 18.964931  -5.140769  -7.374621 
-0.000750  17.859152  1.438654  8.329134 18.965219  -5.141166  -7.375014 
-0.001000  17.860374  1.438590  8.329365 18.965822  -5.141596  -7.375550 
-0.001500  17.861125  1.438647  8.329205 18.965950  -5.142036  -7.375854 
-0.002000  17.861939  1.438670  8.329137 18.966174  -5.142432  -7.376199 
-0.002500  17.862754  1.438692  8.329069 18.966398  -5.142827  -7.376545 
## Displacement Atom 48 Coordinate 3 (Angstrom), D11 , D12 , D13 , D22 , D23 , D33 
0.002500  17.859364  1.438419  8.331058 18.966513  -5.141236  -7.374829 
0.002000  17.859153  1.438453  8.330787 18.966261  -5.141117  -7.374782 
0.001500  17.858968  1.438495  8.330406 18.965962  -5.141040  -7.374760 
0.001000  17.858927  1.438503  8.330167 18.965814  -5.140969  -7.374799 
0.000750  17.858851  1.438525  8.329969 18.965666  -5.140938  -7.374796 
0.000000  17.858237  1.438637  8.329163 18.964931  -5.140769  -7.374621 
-0.000750  17.858393  1.438649  8.328787 18.964783  -5.140753  -7.374780 
-0.001000  17.858317  1.438670  8.328590 18.964637  -5.140723  -7.374777 
-0.001500  17.857840  1.438741  8.328121 18.964162  -5.140572  -7.374619 
-0.002000  17.857650  1.438782  8.327740 18.963862  -5.140493  -7.374595 
-0.002500  17.857336  1.438831  8.327423 18.963540  -5.140351  -7.374502 
## Displacement Atom 49 Coordinate 1 (Angstrom), D11 , D12 , D13 , D22 , D23 , D33 
0.002500  17.858785  1.438615  8.329573 18.965337  -5.140962  -7.374791 
0.002000  17.858764  1.438607  8.329540 18.965323  -5.140941  -7.374796 
0.001500  17.858195  1.438676  8.329230 18.964907  -5.140816  -7.374552 
0.001000  17.858184  1.438669  8.329199 18.964896  -5.140799  -7.374561 
0.000750  17.858461  1.438621  8.329330 18.965105  -5.140839  -7.374695 
0.000000  17.858237  1.438637  8.329163 18.964931  -5.140769  -7.374621 
-0.000750  17.858408  1.438606  8.329222 18.965055  -5.140790  -7.374710 
-0.001000  17.858137  1.438643  8.329072 18.964853  -5.140732  -7.374593 
-0.001500  17.858125  1.438636  8.329039 18.964841  -5.140715  -7.374601 
-0.002000  17.858608  1.438547  8.329283 18.965223  -5.140774  -7.374839 
-0.002500  17.858590  1.438540  8.329252 18.965212  -5.140753  -7.374845 
## Displacement Atom 49 Coordinate 2 (Angstrom), D11 , D12 , D13 , D22 , D23 , D33 
0.002500  17.858979  1.438578  8.330139 18.965718  -5.140934  -7.374800 
0.002000  17.858399  1.438653  8.329656 18.965206  -5.140822  -7.374581 
0.001500  17.858340  1.438654  8.329526 18.965124  -5.140808  -7.374580 
0.001000  17.858525  1.438613  8.329497 18.965216  -5.140834  -7.374700 
0.000750  17.858502  1.438613  8.329442 18.965182  -5.140829  -7.374700 
0.000000  17.858237  1.438637  8.329163 18.964931  -5.140769  -7.374621 
-0.000750  17.858364  1.438614  8.329109 18.964976  -5.140799  -7.374704 
-0.001000  17.858341  1.438614  8.329054 18.964942  -5.140794  -7.374705 
-0.001500  17.857986  1.438657  8.328747 18.964629  -5.140724  -7.374576 
-0.002000  17.857927  1.438658  8.328617 18.964546  -5.140710  -7.374575 
-0.002500  17.858317  1.438587  8.328645 18.964772  -5.140766  -7.374800 
## Displacement Atom 49 Coordinate 3 (Angstrom), D11 , D12 , D13 , D22 , D23 , D33 
0.002500  17.858528  1.438579  8.329769 18.965388  -5.140815  -7.374665 
0.002000  17.858543  1.438581  8.329689 18.965352  -5.140821  -7.374688 
0.001500  17.858558  1.438584  8.329608 18.965316  -5.140826  -7.374711 
0.001000  17.858153  1.438655  8.329257 18.964931  -5.140765  -7.374547 
0.000750  17.858158  1.438655  8.329228 18.964919  -5.140766  -7.374556 
0.000000  17.858237  1.438637  8.329163 18.964931  -5.140769  -7.374621 
-0.000750  17.858186  1.438654  8.329054 18.964847  -5.140770  -7.374608 
-0.001000  17.858191  1.438654  8.329025 18.964835  -5.140770  -7.374617 
-0.001500  17.858648  1.438596  8.329128 18.965104  -5.140859  -7.374847 
-0.002000  17.858663  1.438598  8.329049 18.965069  -5.140864  -7.374871 
-0.002500  17.858679  1.438600  8.328969 18.965034  -5.140870  -7.374893 
## Displacement Atom 50 Coordinate 1 (Angstrom), D11 , D12 , D13 , D22 , D23 , D33 
0.002500  17.872145  1.436837  8.338872 18.976741  -5.139641  -7.381270 
0.002000  17.869080  1.437242  8.336780 18.974155  -5.139853  -7.379800 
0.001500  17.866331  1.437616  8.334859 18.971793  -5.140132  -7.378462 
0.001000  17.863167  1.438031  8.332667 18.969115  -5.140349  -7.376953 
0.000750  17.862130  1.438165  8.331886 18.968197  -5.140537  -7.376443 
0.000000  17.858237  1.438637  8.329163 18.964931  -5.140769  -7.374621 
-0.000750  17.855030  1.439022  8.326826 18.962188  -5.141138  -7.373095 
-0.001000  17.853461  1.439234  8.325764 18.960870  -5.141227  -7.372344 
-0.001500  17.850939  1.439554  8.323914 18.958683  -5.141546  -7.371132 
-0.002000  17.847994  1.439957  8.321893 18.956178  -5.141779  -7.369708 
-0.002500  17.845270  1.440313  8.319986 18.953856  -5.142039  -7.368396 
## Displacement Atom 50 Coordinate 2 (Angstrom), D11 , D12 , D13 , D22 , D23 , D33 
0.002500  17.846263  1.439635  8.320275 18.955252  -5.140538  -7.369595 
0.002000  17.848747  1.439423  8.322100 18.957257  -5.140602  -7.370640 
0.001500  17.851643  1.439138  8.324132 18.959590  -5.140708  -7.371889 
0.001000  17.854122  1.438947  8.326064 18.961626  -5.140713  -7.372914 
0.000750  17.855581  1.438801  8.327110 18.962810  -5.140759  -7.373542 
0.000000  17.858237  1.438637  8.329163 18.964931  -5.140769  -7.374621 
-0.000750  17.861595  1.438384  8.331611 18.967587  -5.140920  -7.376003 
-0.001000  17.862489  1.438321  8.332357 18.968345  -5.140862  -7.376375 
-0.001500  17.865603  1.438037  8.334627 18.970867  -5.140969  -7.377692 
-0.002000  17.868636  1.437734  8.336736 18.973311  -5.141088  -7.379007 
-0.002500  17.871125  1.437524  8.338571 18.975320  -5.141145  -7.380055 
## Displacement Atom 50 Coordinate 3 (Angstrom), D11 , D12 , D13 , D22 , D23 , D33 
0.002500  17.852889  1.439571  8.327645 18.961251  -5.139608  -7.371873 
0.002000  17.854097  1.439358  8.328063 18.962125  -5.139811  -7.372494 
0.001500  17.855251  1.439162  8.328401 18.962918  -5.140073  -7.373079 
0.001000  17.856578  1.438889  8.328669 18.963830  -5.140351  -7.373808 
0.000750  17.857500  1.438739  8.328988 18.964474  -5.140539  -7.374266 
0.000000  17.858237  1.438637  8.329163 18.964931  -5.140769  -7.374621 
-0.000750  17.859685  1.438444  8.329737 18.965930  -5.141143  -7.375283 
-0.001000  17.860093  1.438368  8.329784 18.966189  -5.141237  -7.375509 
-0.001500  17.862158  1.437984  8.330445 18.967678  -5.141633  -7.376579 
-0.002000  17.863305  1.437788  8.330787 18.968471  -5.141891  -7.377161 
-0.002500  17.864706  1.437544  8.331311 18.969499  -5.142125  -7.377872 
## Displacement Atom 51 Coordinate 1 (Angstrom), D11 , D12 , D13 , D22 , D23 , D33 
0.002500  17.850210  1.439996  8.323600 18.957717  -5.142422  -7.370356 
0.002000  17.851560  1.439839  8.324581 18.958859  -5.142296  -7.370989 
0.001500  17.853320  1.439526  8.325776 18.960447  -5.141933  -7.371937 
0.001000  17.854860  1.439233  8.326962 18.961940  -5.141397  -7.372801 
0.000750  17.855743  1.439102  8.327562 18.962699  -5.141286  -7.373245 
0.000000  17.858237  1.438637  8.329163 18.964931  -5.140769  -7.374621 
-0.000750  17.860993  1.438145  8.330922 18.967361  -5.140319  -7.376100 
-0.001000  17.861568  1.438063  8.331366 18.967889  -5.140154  -7.376400 
-0.001500  17.863864  1.437659  8.332954 18.969956  -5.139749  -7.377609 
-0.002000  17.865621  1.437348  8.334153 18.971541  -5.139385  -7.378553 
-0.002500  17.866385  1.437280  8.334830 18.972242  -5.139151  -7.378918 
## Displacement Atom 51 Coordinate 2 (Angstrom), D11 , D12 , D13 , D22 , D23 , D33 
0.002500  17.870604  1.437152  8.334914 18.973789  -5.141880  -7.380553 
0.002000  17.869239  1.437290  8.334021 18.972707  -5.141890  -7.379932 
0.001500  17.866574  1.437616  8.332854 18.970828  -5.141629  -7.378640 
0.001000  17.863118  1.438045  8.331219 18.968330  -5.141317  -7.376982 
0.000750  17.862278  1.438128  8.330740 18.967701  -5.141281  -7.376597 
0.000000  17.858237  1.438637  8.329163 18.964931  -5.140769  -7.374621 
-0.000750  17.854502  1.439111  8.327766 18.962393  -5.140330  -7.372769 
-0.001000  17.853310  1.439250  8.327106 18.961500  -5.140231  -7.372221 
-0.001500  17.850642  1.439561  8.325889 18.959601  -5.140052  -7.370925 
-0.002000  17.847993  1.439884  8.324733 18.957735  -5.139788  -7.369643 
-0.002500  17.846016  1.440112  8.323519 18.956194  -5.139681  -7.368746 
## Displacement Atom 51 Coordinate 3 (Angstrom), D11 , D12 , D13 , D22 , D23 , D33 
0.002500  17.852814  1.439692  8.328953 18.961674  -5.138975  -7.371645 
0.002000  17.853967  1.439473  8.329034 18.962377  -5.139348  -7.372270 
0.001500  17.854988  1.439258  8.329097 18.963031  -5.139612  -7.372853 
0.001000  17.856063  1.439055  8.329119 18.963659  -5.140000  -7.373436 
0.000750  17.856686  1.438950  8.329336 18.964102  -5.140104  -7.373752 
0.000000  17.858237  1.438637  8.329163 18.964931  -5.140769  -7.374621 
-0.000750  17.860092  1.438289  8.329168 18.965991  -5.141508  -7.375614 
-0.001000  17.860364  1.438239  8.329205 18.966172  -5.141551  -7.375768 
-0.001500  17.862032  1.437930  8.329591 18.967303  -5.141957  -7.376642 
-0.002000  17.863184  1.437708  8.329670 18.968009  -5.142330  -7.377268 
-0.002500  17.864335  1.437485  8.329748 18.968715  -5.142703  -7.377894 
## Displacement Atom 52 Coordinate 1 (Angstrom), D11 , D12 , D13 , D22 , D23 , D33 
0.002500  17.859322  1.438303  8.329735 18.966002  -5.140404  -7.375347 
0.002000  17.858547  1.438489  8.329325 18.965313  -5.140481  -7.374902 
0.001500  17.858519  1.438520  8.329313 18.965257  -5.140562  -7.374853 
0.001000  17.858140  1.438629  8.329108 18.964889  -5.140667  -7.374610 
0.000750  17.858542  1.438578  8.329323 18.965182  -5.140775  -7.374779 
0.000000  17.858237  1.438637  8.329163 18.964931  -5.140769  -7.374621 
-0.000750  17.858823  1.438577  8.329496 18.965358  -5.140938  -7.374853 
-0.001000  17.858423  1.438645  8.329287 18.965046  -5.140903  -7.374657 
-0.001500  17.858314  1.438713  8.329222 18.964892  -5.141048  -7.374541 
-0.002000  17.858273  1.438746  8.329202 18.964825  -5.141128  -7.374486 
-0.002500  17.858415  1.438795  8.329268 18.964834  -5.141368  -7.374462 
## Displacement Atom 52 Coordinate 2 (Angstrom), D11 , D12 , D13 , D22 , D23 , D33 
0.002500  17.858703  1.438762  8.329608 18.965144  -5.141201  -7.374603 
0.002000  17.858521  1.438726  8.329455 18.965061  -5.141036  -7.374599 
0.001500  17.858497  1.438698  8.329409 18.965067  -5.140978  -7.374625 
0.001000  17.858625  1.438627  8.329433 18.965209  -5.140893  -7.374746 
0.000750  17.858995  1.438556  8.329617 18.965502  -5.140929  -7.374933 
0.000000  17.858237  1.438637  8.329163 18.964931  -5.140769  -7.374621 
-0.000750  17.858359  1.438601  8.329196 18.965029  -5.140782  -7.374694 
-0.001000  17.857904  1.438652  8.328945 18.964701  -5.140671  -7.374505 
-0.001500  17.858302  1.438540  8.329108 18.965056  -5.140626  -7.374754 
-0.002000  17.858263  1.438515  8.329054 18.965049  -5.140567  -7.374772 
-0.002500  17.859035  1.438336  8.329395 18.965693  -5.140571  -7.375207 
## Displacement Atom 52 Coordinate 3 (Angstrom), D11 , D12 , D13 , D22 , D23 , D33 
0.002500  17.859001  1.438937  8.329201 18.964803  -5.142303  -7.374485 
0.002000  17.858876  1.438856  8.329236 18.964891  -5.141910  -7.374550 
0.001500  17.858681  1.438784  8.329220 18.964914  -5.141537  -7.374579 
0.001000  17.858813  1.438684  8.329348 18.965141  -5.141317  -7.374729 
0.000750  17.858466  1.438661  8.329205 18.964989  -5.141025  -7.374657 
0.000000  17.858237  1.438637  8.329163 18.964931  -5.140769  -7.374621 
-0.000750  17.858810  1.438508  8.329567 18.965484  -5.140673  -7.374934 
-0.001000  17.858433  1.438536  8.329389 18.965243  -5.140525  -7.374792 
-0.001500  17.858321  1.438422  8.329402 18.965366  -5.140097  -7.374895 
-0.002000  17.858352  1.438320  8.329507 18.965563  -5.139765  -7.375025 
-0.002500  17.858790  1.438153  8.329831 18.966078  -5.139473  -7.375351 
## Displacement Atom 53 Coordinate 1 (Angstrom), D11 , D12 , D13 , D22 , D23 , D33 
0.002500  17.859017  1.438540  8.329595 18.965518  -5.140946  -7.374954 
0.002000  17.858961  1.438546  8.329564 18.965477  -5.140930  -7.374931 
0.001500  17.858903  1.438552  8.329531 18.965434  -5.140914  -7.374907 
0.001000  17.858265  1.438646  8.329196 18.964952  -5.140795  -7.374618 
0.000750  17.858483  1.438609  8.329303 18.965116  -5.140826  -7.374723 
0.000000  17.858237  1.438637  8.329163 18.964931  -5.140769  -7.374621 
-0.000750  17.858264  1.438635  8.329185 18.964953  -5.140780  -7.374628 
-0.001000  17.858004  1.438674  8.329047 18.964757  -5.140727  -7.374511 
-0.001500  17.858572  1.438587  8.329344 18.965188  -5.140819  -7.374774 
-0.002000  17.858520  1.438593  8.329315 18.965150  -5.140804  -7.374753 
-0.002500  17.858466  1.438598  8.329285 18.965110  -5.140788  -7.374732 
## Displacement Atom 53 Coordinate 2 (Angstrom), D11 , D12 , D13 , D22 , D23 , D33 
0.002500  17.858855  1.438541  8.329602 18.965469  -5.140822  -7.374896 
0.002000  17.858816  1.438549  8.329560 18.965425  -5.140828  -7.374877 
0.001500  17.858774  1.438558  8.329519 18.965381  -5.140834  -7.374858 
0.001000  17.858166  1.438651  8.329175 18.964902  -5.140747  -7.374579 
0.000750  17.858163  1.438653  8.329164 18.964894  -5.140751  -7.374577 
0.000000  17.858237  1.438637  8.329163 18.964931  -5.140769  -7.374621 
-0.000750  17.858139  1.438662  8.329096 18.964840  -5.140777  -7.374567 
-0.001000  17.858134  1.438664  8.329085 18.964831  -5.140781  -7.374565 
-0.001500  17.858539  1.438606  8.329273 18.965120  -5.140871  -7.374749 
-0.002000  17.858501  1.438614  8.329232 18.965077  -5.140877  -7.374732 
-0.002500  17.858461  1.438622  8.329191 18.965034  -5.140884  -7.374713 
## Displacement Atom 53 Coordinate 3 (Angstrom), D11 , D12 , D13 , D22 , D23 , D33 
0.002500  17.857667  1.438735  8.328880 18.964478  -5.140744  -7.374329 
0.002000  17.857857  1.438706  8.328979 18.964627  -5.140765  -7.374421 
0.001500  17.857698  1.438726  8.328899 18.964518  -5.140709  -7.374356 
0.001000  17.857854  1.438702  8.328979 18.964638  -5.140728  -7.374431 
0.000750  17.858247  1.438644  8.329182 18.964935  -5.140793  -7.374612 
0.000000  17.858237  1.438637  8.329163 18.964931  -5.140769  -7.374621 
-0.000750  17.858615  1.438585  8.329366 18.965220  -5.140834  -7.374791 
-0.001000  17.858475  1.438609  8.329296 18.965116  -5.140805  -7.374726 
-0.001500  17.858630  1.438585  8.329375 18.965235  -5.140824  -7.374800 
-0.002000  17.859378  1.438469  8.329771 18.965815  -5.140926  -7.375152 
-0.002500  17.859569  1.438440  8.329870 18.965964  -5.140947  -7.375243 
## Displacement Atom 54 Coordinate 1 (Angstrom), D11 , D12 , D13 , D22 , D23 , D33 
0.002500  17.859778  1.438739  8.330473 18.965910  -5.144185  -7.374273 
0.002000  17.859563  1.438706  8.330262 18.965787  -5.143518  -7.374384 
0.001500  17.859348  1.438674  8.330050 18.965662  -5.142852  -7.374495 
0.001000  17.858632  1.438763  8.329817 18.965204  -5.142073  -7.374304 
0.000750  17.858842  1.438694  8.329832 18.965368  -5.141789  -7.374520 
0.000000  17.858237  1.438637  8.329163 18.964931  -5.140769  -7.374621 
-0.000750  17.858130  1.438525  8.328792 18.964875  -5.139838  -7.374931 
-0.001000  17.858383  1.438468  8.328938 18.965103  -5.139526  -7.375142 
-0.001500  17.858011  1.438481  8.328766 18.964894  -5.138850  -7.375140 
-0.002000  17.857781  1.438450  8.328550 18.964763  -5.138182  -7.375244 
-0.002500  17.857550  1.438418  8.328333 18.964630  -5.137515  -7.375348 
## Displacement Atom 54 Coordinate 2 (Angstrom), D11 , D12 , D13 , D22 , D23 , D33 
0.002500  17.861101  1.438306  8.329417 18.966446  -5.141420  -7.376122 
0.002000  17.860552  1.438370  8.329381 18.966162  -5.141295  -7.375831 
0.001500  17.860004  1.438434  8.329346 18.965878  -5.141171  -7.375540 
0.001000  17.859738  1.438453  8.329444 18.965804  -5.141099  -7.375382 
0.000750  17.859455  1.438487  8.329425 18.965655  -5.141035  -7.375232 
0.000000  17.858237  1.438637  8.329163 18.964931  -5.140769  -7.374621 
-0.000750  17.857760  1.438691  8.329315 18.964771  -5.140652  -7.374330 
-0.001000  17.857479  1.438725  8.329297 18.964624  -5.140589  -7.374181 
-0.001500  17.856722  1.438816  8.329134 18.964179  -5.140429  -7.373801 
-0.002000  17.856177  1.438880  8.329099 18.963896  -5.140306  -7.373512 
-0.002500  17.855792  1.438929  8.329123 18.963716  -5.140224  -7.373294 
## Displacement Atom 54 Coordinate 3 (Angstrom), D11 , D12 , D13 , D22 , D23 , D33 
0.002500  17.850726  1.439705  8.329182 18.961048  -5.140078  -7.370191 
0.002000  17.852311  1.439480  8.329226 18.961891  -5.140231  -7.371113 
0.001500  17.853969  1.439255  8.329247 18.962746  -5.140413  -7.372072 
0.001000  17.856018  1.439009  8.329330 18.963791  -5.140688  -7.373217 
0.000750  17.857019  1.438864  8.329510 18.964394  -5.140795  -7.373765 
0.000000  17.858237  1.438637  8.329163 18.964931  -5.140769  -7.374621 
-0.000750  17.860213  1.438312  8.329238 18.966044  -5.140895  -7.375805 
-0.001000  17.860671  1.438246  8.329130 18.966239  -5.140903  -7.376108 
-0.001500  17.863167  1.437932  8.329442 18.967632  -5.141248  -7.377463 
-0.002000  17.865057  1.437676  8.329580 18.968662  -5.141470  -7.378529 
-0.002500  17.866660  1.437450  8.329625 18.969513  -5.141627  -7.379460 
## Displacement Atom 55 Coordinate 1 (Angstrom), D11 , D12 , D13 , D22 , D23 , D33 
0.002500  17.858321  1.438572  8.329566 18.965230  -5.140746  -7.374619 
0.002000  17.858367  1.438577  8.329521 18.965219  -5.140763  -7.374646 
0.001500  17.857863  1.438656  8.329232 18.964817  -5.140698  -7.374412 
0.001000  17.857969  1.438655  8.329203 18.964841  -5.140722  -7.374470 
0.000750  17.858157  1.438633  8.329302 18.964974  -5.140771  -7.374549 
0.000000  17.858237  1.438637  8.329163 18.964931  -5.140769  -7.374621 
-0.000750  17.858696  1.438597  8.329241 18.965174  -5.140855  -7.374849 
-0.001000  17.858394  1.438650  8.329089 18.964939  -5.140817  -7.374702 
-0.001500  17.858501  1.438649  8.329060 18.964963  -5.140841  -7.374760 
-0.002000  17.858752  1.438616  8.329169 18.965135  -5.140907  -7.374872 
-0.002500  17.858801  1.438620  8.329126 18.965125  -5.140926  -7.374901 
## Displacement Atom 55 Coordinate 2 (Angstrom), D11 , D12 , D13 , D22 , D23 , D33 
0.002500  17.859750  1.438403  8.329782 18.966039  -5.140794  -7.375418 
0.002000  17.859767  1.438399  8.329839 18.966070  -5.140838  -7.375405 
0.001500  17.859497  1.438443  8.329732 18.965871  -5.140843  -7.375258 
0.001000  17.858600  1.438581  8.329315 18.965205  -5.140746  -7.374819 
0.000750  17.858702  1.438563  8.329383 18.965286  -5.140785  -7.374857 
0.000000  17.858237  1.438637  8.329163 18.964931  -5.140769  -7.374621 
-0.000750  17.858156  1.438666  8.329163 18.964866  -5.140841  -7.374543 
-0.001000  17.857700  1.438734  8.328944 18.964528  -5.140782  -7.374325 
-0.001500  17.857901  1.438708  8.329104 18.964694  -5.140876  -7.374388 
-0.002000  17.857638  1.438752  8.329000 18.964500  -5.140882  -7.374244 
-0.002500  17.856969  1.438849  8.328692 18.964013  -5.140803  -7.373920 
## Displacement Atom 55 Coordinate 3 (Angstrom), D11 , D12 , D13 , D22 , D23 , D33 
0.002500  17.860492  1.438428  8.329838 18.966289  -5.141155  -7.375703 
0.002000  17.860111  1.438461  8.329742 18.966070  -5.141092  -7.375516 
0.001500  17.859057  1.438578  8.329373 18.965394  -5.140920  -7.375011 
0.001000  17.858766  1.438603  8.329298 18.965227  -5.140870  -7.374870 
0.000750  17.858810  1.438579  8.329368 18.965298  -5.140879  -7.374887 
0.000000  17.858237  1.438637  8.329163 18.964931  -5.140769  -7.374621 
-0.000750  17.858037  1.438651  8.329172 18.964846  -5.140746  -7.374509 
-0.001000  17.857603  1.438702  8.328997 18.964557  -5.140670  -7.374306 
-0.001500  17.857313  1.438726  8.328921 18.964391  -5.140620  -7.374165 
-0.002000  17.857079  1.438721  8.328982 18.964336  -5.140589  -7.374036 
-0.002500  17.856701  1.438753  8.328887 18.964119  -5.140526  -7.373851 
## Displacement Atom 56 Coordinate 1 (Angstrom), D11 , D12 , D13 , D22 , D23 , D33 
0.002500  17.857450  1.438783  8.329169 18.964480  -5.140855  -7.374096 
0.002000  17.857365  1.438762  8.329080 18.964432  -5.140791  -7.374096 
0.001500  17.857622  1.438726  8.329125 18.964588  -5.140795  -7.374243 
0.001000  17.857943  1.438672  8.329240 18.964817  -5.140817  -7.374414 
0.000750  17.858114  1.438650  8.329275 18.964919  -5.140824  -7.374508 
0.000000  17.858237  1.438637  8.329163 18.964931  -5.140769  -7.374621 
-0.000750  17.859148  1.438521  8.329489 18.965542  -5.140870  -7.375076 
-0.001000  17.859322  1.438499  8.329525 18.965647  -5.140878  -7.375172 
-0.001500  17.859194  1.438510  8.329401 18.965537  -5.140818  -7.375140 
-0.002000  17.859093  1.438500  8.329295 18.965469  -5.140750  -7.375132 
-0.002500  17.859582  1.438410  8.329418 18.965804  -5.140765  -7.375412 
## Displacement Atom 56 Coordinate 2 (Angstrom), D11 , D12 , D13 , D22 , D23 , D33 
0.002500  17.858035  1.438673  8.329088 18.964788  -5.140709  -7.374525 
0.002000  17.858086  1.438665  8.329111 18.964825  -5.140724  -7.374547 
0.001500  17.858138  1.438658  8.329135 18.964864  -5.140740  -7.374570 
0.001000  17.858560  1.438597  8.329363 18.965183  -5.140828  -7.374757 
0.000750  17.858583  1.438594  8.329371 18.965200  -5.140834  -7.374768 
0.000000  17.858237  1.438637  8.329163 18.964931  -5.140769  -7.374621 
-0.000750  17.858738  1.438569  8.329424 18.965307  -5.140872  -7.374843 
-0.001000  17.858765  1.438565  8.329434 18.965327  -5.140878  -7.374857 
-0.001500  17.858458  1.438611  8.329275 18.965096  -5.140834  -7.374713 
-0.002000  17.858513  1.438603  8.329298 18.965135  -5.140850  -7.374738 
-0.002500  17.858569  1.438595  8.329321 18.965176  -5.140866  -7.374764 
## Displacement Atom 56 Coordinate 3 (Angstrom), D11 , D12 , D13 , D22 , D23 , D33 
0.002500  17.861614  1.437750  8.328504 18.966874  -5.140715  -7.377056 
0.002000  17.861018  1.437917  8.328679 18.966547  -5.140740  -7.376604 
0.001500  17.860423  1.438085  8.328856 18.966221  -5.140766  -7.376152 
0.001000  17.859787  1.438266  8.329064 18.965876  -5.140799  -7.375662 
0.000750  17.858908  1.438480  8.329115 18.965336  -5.140775  -7.375073 
0.000000  17.858237  1.438637  8.329163 18.964931  -5.140769  -7.374621 
-0.000750  17.857785  1.438775  8.329349 18.964698  -5.140817  -7.374254 
-0.001000  17.857478  1.438901  8.329695 18.964603  -5.140883  -7.373932 
-0.001500  17.856826  1.439088  8.329898 18.964249  -5.140913  -7.373434 
-0.002000  17.856224  1.439256  8.330070 18.963919  -5.140937  -7.372979 
-0.002500  17.855623  1.439423  8.330242 18.963589  -5.140961  -7.372526 
## Displacement Atom 57 Coordinate 1 (Angstrom), D11 , D12 , D13 , D22 , D23 , D33 
0.002500  17.857781  1.438668  8.329135 18.964718  -5.140745  -7.374370 
0.002000  17.857948  1.438652  8.329183 18.964818  -5.140765  -7.374453 
0.001500  17.858115  1.438636  8.329231 18.964918  -5.140785  -7.374536 
0.001000  17.857963  1.438675  8.329080 18.964756  -5.140745  -7.374477 
0.000750  17.858015  1.438670  8.329095 18.964788  -5.140751  -7.374503 
0.000000  17.858237  1.438637  8.329163 18.964931  -5.140769  -7.374621 
-0.000750  17.858326  1.438639  8.329185 18.964976  -5.140784  -7.374659 
-0.001000  17.858378  1.438634  8.329200 18.965008  -5.140790  -7.374685 
-0.001500  17.859123  1.438539  8.329521 18.965525  -5.140906  -7.375037 
-0.002000  17.859294  1.438522  8.329570 18.965628  -5.140926  -7.375122 
-0.002500  17.859465  1.438506  8.329619 18.965731  -5.140947  -7.375207 
## Displacement Atom 57 Coordinate 2 (Angstrom), D11 , D12 , D13 , D22 , D23 , D33 
0.002500  17.858528  1.438603  8.329298 18.965146  -5.140785  -7.374763 
0.002000  17.859001  1.438531  8.329556 18.965506  -5.140876  -7.374976 
0.001500  17.858943  1.438540  8.329530 18.965463  -5.140875  -7.374945 
0.001000  17.858213  1.438649  8.329155 18.964913  -5.140758  -7.374606 
0.000750  17.858500  1.438605  8.329306 18.965129  -5.140813  -7.374737 
0.000000  17.858237  1.438637  8.329163 18.964931  -5.140769  -7.374621 
-0.000750  17.858387  1.438620  8.329256 18.965046  -5.140819  -7.374677 
-0.001000  17.858020  1.438676  8.329069 18.964770  -5.140758  -7.374506 
-0.001500  17.858633  1.438585  8.329399 18.965236  -5.140875  -7.374782 
-0.002000  17.858589  1.438591  8.329381 18.965204  -5.140876  -7.374759 
-0.002500  17.857969  1.438681  8.329060 18.964739  -5.140771  -7.374475 
## Displacement Atom 57 Coordinate 3 (Angstrom), D11 , D12 , D13 , D22 , D23 , D33 
0.002500  17.859005  1.438612  8.329458 18.965375  -5.140956  -7.374938 
0.002000  17.858837  1.438621  8.329394 18.965276  -5.140918  -7.374866 
0.001500  17.858670  1.438629  8.329330 18.965177  -5.140880  -7.374795 
0.001000  17.858756  1.438595  8.329396 18.965272  -5.140885  -7.374843 
0.000750  17.858675  1.438600  8.329365 18.965224  -5.140867  -7.374808 
0.000000  17.858237  1.438637  8.329163 18.964931  -5.140769  -7.374621 
-0.000750  17.858190  1.438628  8.329185 18.964934  -5.140761  -7.374597 
-0.001000  17.858109  1.438633  8.329155 18.964886  -5.140743  -7.374561 
-0.001500  17.857665  1.438681  8.328947 18.964582  -5.140653  -7.374365 
-0.002000  17.857497  1.438689  8.328883 18.964483  -5.140616  -7.374293 
-0.002500  17.857330  1.438698  8.328819 18.964384  -5.140578  -7.374222 
## Displacement Atom 58 Coordinate 1 (Angstrom), D11 , D12 , D13 , D22 , D23 , D33 
0.002500  17.860018  1.438578  8.329490 18.965772  -5.141564  -7.375344 
0.002000  17.859540  1.438591  8.329418 18.965558  -5.141344  -7.375150 
0.001500  17.859461  1.438554  8.329528 18.965621  -5.141224  -7.375131 
0.001000  17.858931  1.438569  8.329448 18.965383  -5.140992  -7.374912 
0.000750  17.858861  1.438573  8.329434 18.965349  -5.140957  -7.374884 
0.000000  17.858237  1.438637  8.329163 18.964931  -5.140769  -7.374621 
-0.000750  17.858445  1.438592  8.329354 18.965147  -5.140746  -7.374720 
-0.001000  17.858378  1.438595  8.329342 18.965115  -5.140711  -7.374694 
-0.001500  17.857787  1.438652  8.329122 18.964745  -5.140536  -7.374437 
-0.002000  17.857480  1.438615  8.329219 18.964734  -5.140298  -7.374330 
-0.002500  17.857220  1.438618  8.329194 18.964630  -5.140166  -7.374226 
## Displacement Atom 58 Coordinate 2 (Angstrom), D11 , D12 , D13 , D22 , D23 , D33 
0.002500  17.858810  1.438584  8.329829 18.965494  -5.140930  -7.374769 
0.002000  17.858428  1.438627  8.329534 18.965181  -5.140851  -7.374626 
0.001500  17.858346  1.438615  8.329464 18.965135  -5.140813  -7.374613 
0.001000  17.858596  1.438572  8.329566 18.965319  -5.140844  -7.374741 
0.000750  17.858607  1.438575  8.329522 18.965299  -5.140845  -7.374755 
0.000000  17.858237  1.438637  8.329163 18.964931  -5.140769  -7.374621 
-0.000750  17.858682  1.438593  8.329258 18.965184  -5.140854  -7.374842 
-0.001000  17.858696  1.438595  8.329216 18.965166  -5.140856  -7.374857 
-0.001500  17.858383  1.438634  8.329023 18.964928  -5.140785  -7.374729 
-0.002000  17.858387  1.438636  8.328950 18.964894  -5.140779  -7.374747 
-0.002500  17.858566  1.438568  8.329005 18.965067  -5.140778  -7.374869 
## Displacement Atom 58 Coordinate 3 (Angstrom), D11 , D12 , D13 , D22 , D23 , D33 
0.002500  17.856270  1.438660  8.330392 18.964799  -5.139476  -7.373597 
0.002000  17.856742  1.438645  8.330190 18.964887  -5.139749  -7.373837 
0.001500  17.857228  1.438636  8.329896 18.964929  -5.140065  -7.374091 
0.001000  17.858145  1.438552  8.329919 18.965351  -5.140436  -7.374531 
0.000750  17.857944  1.438636  8.329435 18.964962  -5.140571  -7.374453 
0.000000  17.858237  1.438637  8.329163 18.964931  -5.140769  -7.374621 
-0.000750  17.858737  1.438620  8.329022 18.965063  -5.141019  -7.374868 
-0.001000  17.859776  1.438519  8.329185 18.965617  -5.141367  -7.375360 
-0.001500  17.859889  1.438554  8.328784 18.965436  -5.141593  -7.375436 
-0.002000  17.860510  1.438529  8.328568 18.965585  -5.141931  -7.375748 
-0.002500  17.860980  1.438515  8.328365 18.965672  -5.142204  -7.375987 
## Displacement Atom 59 Coordinate 1 (Angstrom), D11 , D12 , D13 , D22 , D23 , D33 
0.002500  17.858622  1.438588  8.329523 18.965289  -5.140873  -7.374750 
0.002000  17.858640  1.438585  8.329503 18.965290  -5.140871  -7.374766 
0.001500  17.858103  1.438670  8.329168 18.964852  -5.140776  -7.374529 
0.001000  17.858120  1.438666  8.329156 18.964858  -5.140772  -7.374544 
0.000750  17.858438  1.438620  8.329298 18.965083  -5.140829  -7.374693 
0.000000  17.858237  1.438637  8.329163 18.964931  -5.140769  -7.374621 
-0.000750  17.858437  1.438606  8.329258 18.965082  -5.140801  -7.374715 
-0.001000  17.858183  1.438649  8.329105 18.964877  -5.140756  -7.374601 
-0.001500  17.858198  1.438644  8.329092 18.964882  -5.140752  -7.374615 
-0.002000  17.858800  1.438560  8.329356 18.965308  -5.140855  -7.374900 
-0.002500  17.858821  1.438556  8.329338 18.965312  -5.140853  -7.374918 
## Displacement Atom 59 Coordinate 2 (Angstrom), D11 , D12 , D13 , D22 , D23 , D33 
0.002500  17.858559  1.438565  8.329508 18.965293  -5.140799  -7.374750 
0.002000  17.858572  1.438569  8.329482 18.965279  -5.140809  -7.374757 
0.001500  17.858583  1.438574  8.329455 18.965265  -5.140818  -7.374765 
0.001000  17.858159  1.438651  8.329170 18.964897  -5.140757  -7.374573 
0.000750  17.858162  1.438652  8.329163 18.964893  -5.140760  -7.374575 
0.000000  17.858237  1.438637  8.329163 18.964931  -5.140769  -7.374621 
-0.000750  17.858176  1.438657  8.329116 18.964869  -5.140775  -7.374586 
-0.001000  17.858179  1.438658  8.329109 18.964864  -5.140777  -7.374588 
-0.001500  17.858659  1.438600  8.329300 18.965183  -5.140874  -7.374811 
-0.002000  17.858673  1.438604  8.329275 18.965170  -5.140883  -7.374819 
-0.002500  17.858686  1.438609  8.329250 18.965157  -5.140892  -7.374827 
## Displacement Atom 59 Coordinate 3 (Angstrom), D11 , D12 , D13 , D22 , D23 , D33 
0.002500  17.858389  1.438521  8.329459 18.965265  -5.140739  -7.374706 
0.002000  17.858022  1.438609  8.329184 18.964909  -5.140702  -7.374532 
0.001500  17.858059  1.438621  8.329173 18.964902  -5.140718  -7.374544 
0.001000  17.858096  1.438632  8.329162 18.964895  -5.140735  -7.374556 
0.000750  17.858375  1.438599  8.329286 18.965083  -5.140787  -7.374684 
0.000000  17.858237  1.438637  8.329163 18.964931  -5.140769  -7.374621 
-0.000750  17.858491  1.438629  8.329265 18.965076  -5.140841  -7.374721 
-0.001000  17.858240  1.438678  8.329116 18.964865  -5.140799  -7.374604 
-0.001500  17.858276  1.438689  8.329105 18.964857  -5.140816  -7.374615 
-0.002000  17.858311  1.438701  8.329093 18.964850  -5.140832  -7.374627 
-0.002500  17.858850  1.438653  8.329295 18.965181  -5.140952  -7.374868 
## Displacement Atom 60 Coordinate 1 (Angstrom), D11 , D12 , D13 , D22 , D23 , D33 
0.002500  17.856223  1.438735  8.327272 18.963185  -5.141042  -7.373818 
0.002000  17.856783  1.438703  8.327718 18.963638  -5.141014  -7.374048 
0.001500  17.857162  1.438685  8.328091 18.963974  -5.140957  -7.374197 
0.001000  17.857917  1.438607  8.328649 18.964597  -5.140959  -7.374524 
0.000750  17.858092  1.438602  8.328830 18.964752  -5.140931  -7.374589 
0.000000  17.858237  1.438637  8.329163 18.964931  -5.140769  -7.374621 
-0.000750  17.859135  1.438575  8.329916 18.965683  -5.140758  -7.374979 
-0.001000  17.859309  1.438570  8.330097 18.965839  -5.140730  -7.375044 
-0.001500  17.859423  1.438586  8.330317 18.965978  -5.140617  -7.375080 
-0.002000  17.859796  1.438570  8.330687 18.966309  -5.140559  -7.375225 
-0.002500  17.860582  1.438506  8.331256 18.966935  -5.140571  -7.375558 
## Displacement Atom 60 Coordinate 2 (Angstrom), D11 , D12 , D13 , D22 , D23 , D33 
0.002500  17.862793  1.438144  8.332770 18.968904  -5.139964  -7.376767 
0.002000  17.861936  1.438213  8.332095 18.968183  -5.140090  -7.376380 
0.001500  17.860357  1.438381  8.331031 18.966917  -5.140122  -7.375662 
0.001000  17.859812  1.438431  8.330499 18.966392  -5.140365  -7.375393 
0.000750  17.859514  1.438470  8.330219 18.966100  -5.140485  -7.375241 
0.000000  17.858237  1.438637  8.329163 18.964931  -5.140769  -7.374621 
-0.000750  17.857732  1.438704  8.328538 18.964350  -5.141207  -7.374336 
-0.001000  17.857435  1.438743  8.328258 18.964058  -5.141327  -7.374184 
-0.001500  17.856263  1.438885  8.327395 18.963061  -5.141458  -7.373631 
-0.002000  17.855361  1.438952  8.326687 18.962311  -5.141605  -7.373223 
-0.002500  17.854157  1.439073  8.325829 18.961331  -5.141668  -7.372679 
## Displacement Atom 60 Coordinate 3 (Angstrom), D11 , D12 , D13 , D22 , D23 , D33 
0.002500  17.862425  1.437314  8.329934 18.968368  -5.140359  -7.377495 
0.002000  17.861431  1.437620  8.329695 18.967538  -5.140464  -7.376827 
0.001500  17.860745  1.437860  8.329623 18.966974  -5.140561  -7.376326 
0.001000  17.859800  1.438143  8.329416 18.966201  -5.140643  -7.375695 
0.000750  17.859769  1.438219  8.329557 18.966155  -5.140740  -7.375583 
0.000000  17.858237  1.438637  8.329163 18.964931  -5.140769  -7.374621 
-0.000750  17.857749  1.438872  8.329284 18.964539  -5.140885  -7.374182 
-0.001000  17.857281  1.439052  8.329249 18.964139  -5.141006  -7.373815 
-0.001500  17.856630  1.439295  8.329202 18.963595  -5.141140  -7.373316 
-0.002000  17.855944  1.439534  8.329133 18.963033  -5.141236  -7.372815 
-0.002500  17.855301  1.439784  8.329076 18.962472  -5.141401  -7.372311 
## Displacement Atom 61 Coordinate 1 (Angstrom), D11 , D12 , D13 , D22 , D23 , D33 
0.002500  17.859021  1.438483  8.329801 18.965700  -5.140748  -7.374991 
0.002000  17.859105  1.438475  8.329800 18.965731  -5.140800  -7.375027 
0.001500  17.858990  1.438502  8.329697 18.965608  -5.140812  -7.374970 
0.001000  17.858258  1.438625  8.329270 18.965011  -5.140740  -7.374623 
0.000750  17.858425  1.438606  8.329328 18.965112  -5.140791  -7.374697 
0.000000  17.858237  1.438637  8.329163 18.964931  -5.140769  -7.374621 
-0.000750  17.858090  1.438679  8.329035 18.964774  -5.140786  -7.374543 
-0.001000  17.858065  1.438687  8.329001 18.964739  -5.140792  -7.374531 
-0.001500  17.858307  1.438664  8.329086 18.964880  -5.140889  -7.374630 
-0.002000  17.858193  1.438691  8.328985 18.964759  -5.140902  -7.374573 
-0.002500  17.857604  1.438781  8.328628 18.964282  -5.140832  -7.374303 
## Displacement Atom 61 Coordinate 2 (Angstrom), D11 , D12 , D13 , D22 , D23 , D33 
0.002500  17.858665  1.438597  8.329390 18.965242  -5.140793  -7.374818 
0.002000  17.858954  1.438555  8.329543 18.965460  -5.140844  -7.374949 
0.001500  17.858870  1.438563  8.329501 18.965400  -5.140844  -7.374908 
0.001000  17.858454  1.438620  8.329279 18.965090  -5.140772  -7.374721 
0.000750  17.858383  1.438628  8.329244 18.965038  -5.140771  -7.374686 
0.000000  17.858237  1.438637  8.329163 18.964931  -5.140769  -7.374621 
-0.000750  17.857952  1.438681  8.329033 18.964721  -5.140763  -7.374474 
-0.001000  17.857880  1.438691  8.328997 18.964668  -5.140762  -7.374438 
-0.001500  17.858365  1.438612  8.329249 18.965041  -5.140846  -7.374664 
-0.002000  17.858281  1.438621  8.329207 18.964981  -5.140847  -7.374623 
-0.002500  17.858197  1.438629  8.329165 18.964921  -5.140847  -7.374582 
## Displacement Atom 61 Coordinate 3 (Angstrom), D11 , D12 , D13 , D22 , D23 , D33 
0.002500  17.856604  1.438883  8.328624 18.963809  -5.140681  -7.373751 
0.002000  17.856791  1.438859  8.328634 18.963916  -5.140663  -7.373868 
0.001500  17.857140  1.438807  8.328763 18.964161  -5.140690  -7.374048 
0.001000  17.857783  1.438719  8.329032 18.964612  -5.140780  -7.374359 
0.000750  17.857941  1.438693  8.329090 18.964725  -5.140787  -7.374443 
0.000000  17.858237  1.438637  8.329163 18.964931  -5.140769  -7.374621 
-0.000750  17.858887  1.438540  8.329440 18.965405  -5.140834  -7.374945 
-0.001000  17.859045  1.438514  8.329498 18.965518  -5.140841  -7.375028 
-0.001500  17.859231  1.438497  8.329533 18.965626  -5.140851  -7.375128 
-0.002000  17.859580  1.438446  8.329661 18.965870  -5.140878  -7.375308 
-0.002500  17.860602  1.438296  8.330111 18.966611  -5.141005  -7.375808 
## Displacement Atom 62 Coordinate 1 (Angstrom), D11 , D12 , D13 , D22 , D23 , D33 
0.002500  17.852117  1.439582  8.328563 18.961383  -5.140088  -7.371132 
0.002000  17.853425  1.439382  8.328729 18.962158  -5.140239  -7.371867 
0.001500  17.854734  1.439182  8.328896 18.962934  -5.140391  -7.372603 
0.001000  17.856053  1.438973  8.329020 18.963702  -5.140535  -7.373359 
0.000750  17.856849  1.438839  8.328968 18.964114  -5.140628  -7.373845 
0.000000  17.858237  1.438637  8.329163 18.964931  -5.140769  -7.374621 
-0.000750  17.859859  1.438413  8.329504 18.965931  -5.140966  -7.375488 
-0.001000  17.861412  1.438170  8.329888 18.966940  -5.141166  -7.376319 
-0.001500  17.862574  1.437983  8.329894 18.967582  -5.141301  -7.377008 
-0.002000  17.863877  1.437784  8.330060 18.968354  -5.141453  -7.377740 
-0.002500  17.865180  1.437585  8.330226 18.969126  -5.141605  -7.378471 
## Displacement Atom 62 Coordinate 2 (Angstrom), D11 , D12 , D13 , D22 , D23 , D33 
0.002500  17.856096  1.438929  8.328590 18.963567  -5.140619  -7.373476 
0.002000  17.856545  1.438868  8.328718 18.963857  -5.140654  -7.373713 
0.001500  17.856996  1.438808  8.328847 18.964147  -5.140689  -7.373950 
0.001000  17.857774  1.438701  8.329135 18.964676  -5.140791  -7.374337 
0.000750  17.857988  1.438672  8.329196 18.964814  -5.140805  -7.374451 
0.000000  17.858237  1.438637  8.329163 18.964931  -5.140769  -7.374621 
-0.000750  17.859282  1.438498  8.329573 18.965654  -5.140891  -7.375137 
-0.001000  17.859501  1.438468  8.329637 18.965795  -5.140906  -7.375253 
-0.001500  17.859728  1.438444  8.329630 18.965907  -5.140909  -7.375389 
-0.002000  17.860187  1.438383  8.329763 18.966203  -5.140947  -7.375631 
-0.002500  17.860649  1.438321  8.329895 18.966500  -5.140985  -7.375873 
## Displacement Atom 62 Coordinate 3 (Angstrom), D11 , D12 , D13 , D22 , D23 , D33 
0.002500  17.862328  1.438403  8.330989 18.967515  -5.140926  -7.376513 
0.002000  17.861593  1.438439  8.330671 18.967062  -5.140910  -7.376170 
0.001500  17.860647  1.438470  8.330104 18.966426  -5.140820  -7.375789 
0.001000  17.860238  1.438465  8.329947 18.966210  -5.140859  -7.375596 
0.000750  17.859832  1.438495  8.329804 18.965962  -5.140855  -7.375393 
0.000000  17.858237  1.438637  8.329163 18.964931  -5.140769  -7.374621 
-0.000750  17.857406  1.438680  8.328947 18.964481  -5.140836  -7.374180 
-0.001000  17.857003  1.438710  8.328805 18.964236  -5.140833  -7.373979 
-0.001500  17.856180  1.438766  8.328425 18.963705  -5.140795  -7.373599 
-0.002000  17.855776  1.438717  8.328137 18.963482  -5.140794  -7.373469 
-0.002500  17.855116  1.438705  8.327683 18.963054  -5.140709  -7.373239 
## Displacement Atom 63 Coordinate 1 (Angstrom), D11 , D12 , D13 , D22 , D23 , D33 
0.002500  17.857856  1.438749  8.329382 18.964759  -5.141058  -7.374238 
0.002000  17.857702  1.438763  8.329171 18.964599  -5.140929  -7.374226 
0.001500  17.857818  1.438736  8.329163 18.964669  -5.140888  -7.374315 
0.001000  17.858248  1.438660  8.329302 18.964970  -5.140887  -7.374555 
0.000750  17.858294  1.438649  8.329296 18.964997  -5.140869  -7.374592 
0.000000  17.858237  1.438637  8.329163 18.964931  -5.140769  -7.374621 
-0.000750  17.858571  1.438579  8.329255 18.965161  -5.140759  -7.374813 
-0.001000  17.858618  1.438567  8.329249 18.965189  -5.140741  -7.374850 
-0.001500  17.858516  1.438574  8.329114 18.965090  -5.140646  -7.374845 
-0.002000  17.858633  1.438547  8.329106 18.965160  -5.140605  -7.374933 
-0.002500  17.859343  1.438432  8.329350 18.965655  -5.140626  -7.375317 
## Displacement Atom 63 Coordinate 2 (Angstrom), D11 , D12 , D13 , D22 , D23 , D33 
0.002500  17.858443  1.438617  8.329431 18.965159  -5.140829  -7.374670 
0.002000  17.858770  1.438567  8.329570 18.965390  -5.140879  -7.374828 
0.001500  17.858756  1.438568  8.329535 18.965367  -5.140875  -7.374829 
0.001000  17.858142  1.438659  8.329176 18.964885  -5.140762  -7.374557 
0.000750  17.858444  1.438612  8.329314 18.965104  -5.140813  -7.374702 
0.000000  17.858237  1.438637  8.329163 18.964931  -5.140769  -7.374621 
-0.000750  17.858440  1.438613  8.329246 18.965068  -5.140819  -7.374711 
-0.001000  17.858103  1.438665  8.329054 18.964806  -5.140756  -7.374561 
-0.001500  17.858704  1.438573  8.329334 18.965246  -5.140854  -7.374846 
-0.002000  17.858702  1.438574  8.329304 18.965230  -5.140852  -7.374852 
-0.002500  17.858341  1.438625  8.329078 18.964943  -5.140778  -7.374698 
## Displacement Atom 63 Coordinate 3 (Angstrom), D11 , D12 , D13 , D22 , D23 , D33 
0.002500  17.859426  1.438492  8.329557 18.965705  -5.140906  -7.375217 
0.002000  17.859256  1.438512  8.329517 18.965602  -5.140893  -7.375127 
0.001500  17.859087  1.438533  8.329476 18.965500  -5.140879  -7.375037 
0.001000  17.858381  1.438628  8.329189 18.965010  -5.140784  -7.374694 
0.000750  17.858329  1.438635  8.329177 18.964979  -5.140780  -7.374666 
0.000000  17.858237  1.438637  8.329163 18.964931  -5.140769  -7.374621 
-0.000750  17.858017  1.438674  8.329106 18.964789  -5.140756  -7.374499 
-0.001000  17.857965  1.438680  8.329094 18.964757  -5.140752  -7.374471 
-0.001500  17.858083  1.438653  8.329239 18.964892  -5.140799  -7.374505 
-0.002000  17.857917  1.438672  8.329200 18.964792  -5.140786  -7.374417 
-0.002500  17.857751  1.438692  8.329161 18.964692  -5.140773  -7.374330 
## Displacement Atom 64 Coordinate 1 (Angstrom), D11 , D12 , D13 , D22 , D23 , D33 
0.002500  17.859136  1.438889  8.329475 18.965060  -5.141769  -7.374658 
0.002000  17.858783  1.438826  8.329359 18.964974  -5.141393  -7.374620 
0.001500  17.858698  1.438773  8.329339 18.965004  -5.141247  -7.374642 
0.001000  17.858520  1.438691  8.329290 18.965024  -5.140968  -7.374668 
0.000750  17.858887  1.438605  8.329492 18.965343  -5.140985  -7.374862 
0.000000  17.858237  1.438637  8.329163 18.964931  -5.140769  -7.374621 
-0.000750  17.858529  1.438543  8.329352 18.965234  -5.140737  -7.374793 
-0.001000  17.857988  1.438591  8.329076 18.964869  -5.140592  -7.374573 
-0.001500  17.858135  1.438460  8.329197 18.965145  -5.140361  -7.374752 
-0.002000  17.858360  1.438335  8.329366 18.965460  -5.140177  -7.374948 
-0.002500  17.858490  1.438225  8.329475 18.965695  -5.139976  -7.375101 
## Displacement Atom 64 Coordinate 2 (Angstrom), D11 , D12 , D13 , D22 , D23 , D33 
0.002500  17.858769  1.438159  8.329407 18.965837  -5.139977  -7.375300 
0.002000  17.858789  1.438237  8.329426 18.965753  -5.140159  -7.375221 
0.001500  17.858548  1.438366  8.329309 18.965455  -5.140341  -7.375004 
0.001000  17.858272  1.438500  8.329160 18.965121  -5.140516  -7.374774 
0.000750  17.858083  1.438609  8.329051 18.964866  -5.140674  -7.374600 
0.000000  17.858237  1.438637  8.329163 18.964931  -5.140769  -7.374621 
-0.000750  17.858439  1.438671  8.329323 18.965039  -5.140887  -7.374648 
-0.001000  17.858596  1.438726  8.329394 18.965057  -5.141096  -7.374638 
-0.001500  17.858814  1.438790  8.329507 18.965101  -5.141357  -7.374632 
-0.002000  17.858947  1.438860  8.329580 18.965088  -5.141605  -7.374590 
-0.002500  17.858965  1.438938  8.329599 18.965003  -5.141785  -7.374511 
## Displacement Atom 64 Coordinate 3 (Angstrom), D11 , D12 , D13 , D22 , D23 , D33 
0.002500  17.853284  1.439388  8.326198 18.960872  -5.140549  -7.372250 
0.002000  17.854367  1.439226  8.326842 18.961755  -5.140610  -7.372765 
0.001500  17.855349  1.439060  8.327430 18.962586  -5.140610  -7.373255 
0.001000  17.856624  1.438886  8.328151 18.963577  -5.140766  -7.373838 
0.000750  17.857131  1.438810  8.328462 18.963995  -5.140787  -7.374079 
0.000000  17.858237  1.438637  8.329163 18.964931  -5.140769  -7.374621 
-0.000750  17.860173  1.438354  8.330325 18.966500  -5.140915  -7.375525 
-0.001000  17.860681  1.438278  8.330637 18.966918  -5.140937  -7.375766 
-0.001500  17.861249  1.438207  8.330985 18.967377  -5.140965  -7.376029 
-0.002000  17.862433  1.438028  8.331677 18.968338  -5.141045  -7.376592 
-0.002500  17.864077  1.437764  8.332617 18.969674  -5.141161  -7.377384 
## Displacement Atom 65 Coordinate 1 (Angstrom), D11 , D12 , D13 , D22 , D23 , D33 
0.002500  17.858752  1.438564  8.329451 18.965325  -5.140941  -7.374830 
0.002000  17.858756  1.438564  8.329451 18.965327  -5.140927  -7.374835 
0.001500  17.858757  1.438564  8.329451 18.965328  -5.140913  -7.374839 
0.001000  17.858753  1.438566  8.329448 18.965324  -5.140898  -7.374841 
0.000750  17.858302  1.438634  8.329201 18.964974  -5.140812  -7.374638 
0.000000  17.858237  1.438637  8.329163 18.964931  -5.140769  -7.374621 
-0.000750  17.858342  1.438625  8.329233 18.965017  -5.140775  -7.374667 
-0.001000  17.858770  1.438566  8.329453 18.965335  -5.140843  -7.374863 
-0.001500  17.858784  1.438565  8.329459 18.965345  -5.140831  -7.374873 
-0.002000  17.858791  1.438564  8.329462 18.965350  -5.140818  -7.374880 
-0.002500  17.858797  1.438564  8.329464 18.965354  -5.140805  -7.374886 
## Displacement Atom 65 Coordinate 2 (Angstrom), D11 , D12 , D13 , D22 , D23 , D33 
0.002500  17.858872  1.438552  8.329673 18.965497  -5.140765  -7.374898 
0.002000  17.858838  1.438557  8.329623 18.965455  -5.140784  -7.374883 
0.001500  17.858802  1.438562  8.329571 18.965411  -5.140802  -7.374868 
0.001000  17.858192  1.438652  8.329213 18.964930  -5.140724  -7.374590 
0.000750  17.858405  1.438618  8.329299 18.965079  -5.140774  -7.374690 
0.000000  17.858237  1.438637  8.329163 18.964931  -5.140769  -7.374621 
-0.000750  17.858320  1.438630  8.329177 18.964973  -5.140828  -7.374651 
-0.001000  17.858076  1.438668  8.329030 18.964778  -5.140798  -7.374539 
-0.001500  17.858609  1.438587  8.329271 18.965163  -5.140919  -7.374785 
-0.002000  17.858580  1.438591  8.329223 18.965125  -5.140939  -7.374772 
-0.002500  17.858549  1.438595  8.329174 18.965084  -5.140959  -7.374759 
## Displacement Atom 65 Coordinate 3 (Angstrom), D11 , D12 , D13 , D22 , D23 , D33 
0.002500  17.857761  1.438734  8.328786 18.964459  -5.140932  -7.374353 
0.002000  17.857933  1.438704  8.328904 18.964612  -5.140915  -7.374440 
0.001500  17.858104  1.438675  8.329022 18.964764  -5.140897  -7.374526 
0.001000  17.857903  1.438700  8.328954 18.964643  -5.140797  -7.374446 
0.000750  17.857968  1.438689  8.329000 18.964702  -5.140790  -7.374479 
0.000000  17.858237  1.438637  8.329163 18.964931  -5.140769  -7.374621 
-0.000750  17.858358  1.438622  8.329273 18.965051  -5.140743  -7.374677 
-0.001000  17.858423  1.438611  8.329318 18.965109  -5.140735  -7.374710 
-0.001500  17.859134  1.438500  8.329730 18.965679  -5.140794  -7.375047 
-0.002000  17.859305  1.438471  8.329847 18.965832  -5.140776  -7.375133 
-0.002500  17.859476  1.438441  8.329965 18.965983  -5.140759  -7.375220 
