# Supplementary material for: Intra-molecular origin of the spin-phonon coupling in slow-relaxing molecular magnets
Source: Chem Sci. 2017 Jul 31;8(9):6051–9. doi: 10.1039/c7sc02832f (PMC5625570; doi:10.1039/c7sc02832f)
Supplement: Supplementary file 2 [file SC-008-C7SC02832F-s002.dat]

       35.915457
       36.851611
       42.952285
       45.086222
       46.262446
       48.082680
       51.607084
       53.376541
       55.224644
       57.995323
       58.405610
       60.694305
       62.329812
       65.995879
       66.807120
       69.953209
       70.382457
       72.394295
       72.807472
       75.583266
       78.287485
       80.822342
       81.160596
       84.919635
       85.408171
       86.510971
       87.301772
       88.980152
       90.748616
       94.681685
       97.006741
       98.147815
      101.256764
      101.566430
      102.383239
      102.676442
      103.589240
      105.698998
      106.288437
      106.681017
      109.572264
      110.841965
      112.298140
      113.652489
      114.484089
      117.673187
      118.148980
      121.812187
      122.388360
      125.931786
      128.345176
      128.518576
      130.756009
      131.536995
      133.434945
      135.252192
      136.312429
      137.810392
      140.010730
      143.780679
      144.955993
      146.416624
      148.519025
      151.516022
      152.341888
      155.193647
      155.317609
      156.629467
      159.230240
      159.887619
      160.720745
      162.550306
      166.351616
      167.367233
      168.600622
      169.036610
      172.390118
      173.395776
      176.590794
      177.776670
      181.765555
      182.721233
      184.849797
      185.843188
      188.612780
      191.989837
      193.225212
      194.840363
      197.161921
      197.373330
      198.583726
      199.509694
      200.925778
      205.344212
      208.393634
      214.455632
      214.707234
      217.009825
      220.599922
      224.608940
      226.702895
      231.124183
      231.252526
      241.071301
      241.170009
      243.264406
      244.587296
      246.132810
      246.427091
      252.631984
      253.848595
      257.668835
      258.597531
      273.701976
      274.133268
      275.899526
      277.263709
      280.297847
      280.919267
      284.490586
      284.712647
      287.495501
      287.798649
      293.453041
      294.011157
      303.270562
      303.826060
      307.402495
      308.592360
      311.079527
      311.360671
      313.444767
      314.133573
      315.191051
      316.259396
      319.875055
      321.311565
      327.597687
      328.707677
      330.145648
      330.312375
      332.327158
      332.671231
      332.849430
      334.147508
      335.667080
      336.235233
      339.060798
      341.647563
      348.315425
      348.714636
      361.172908
      361.376150
      366.988067
      368.139269
      370.987120
      371.138424
      374.591435
      374.705582
      378.870078
      379.686967
      382.134016
      382.460707
      392.802385
      393.013386
      402.896029
      406.292850
      406.727777
      408.421612
      412.302546
      415.766583
      419.358808
      419.759970
      461.044755
      461.762737
      467.390026
      468.601262
      481.852198
      482.107125
      500.445661
      500.995683
      502.805683
      507.799961
      515.246617
      515.300677
      521.381071
      521.937303
      524.096451
      524.418908
      556.950727
      557.112016
      557.978264
      558.315825
      563.537690
      563.616609
      614.674769
      614.855141
      615.336670
      615.730654
      617.577087
      617.625773
      623.641633
      626.275305
      633.876638
      635.463083
      635.976374
      637.114556
      662.176890
      662.525909
      663.077403
      664.060387
      672.173089
      672.611009
      677.317089
      678.588806
      681.561057
      681.638182
      682.625186
      683.007157
      692.975975
      696.333192
      699.821260
      701.209596
      704.911555
      705.009062
      732.355804
      735.373214
      740.473365
      740.517933
      741.003093
      749.555289
      754.113573
      755.269876
      759.536730
      759.683386
      761.416403
      763.181371
      767.078020
      767.318562
      769.511966
      772.984423
      774.901570
      775.018437
      810.144020
      811.011316
      812.372013
      814.213786
      814.948189
      823.334895
      824.594762
      825.388970
      825.750342
      829.974496
      832.563685
      832.985173
      834.657374
      835.549801
      835.868189
      836.604173
      843.037973
      843.221947
      844.775643
      844.842691
      850.832211
      850.923492
      855.758306
      856.393533
      856.463967
      859.148461
      887.157645
      889.323960
      899.565652
      900.026499
      910.684468
      911.411086
      927.012634
      928.981565
      929.089843
      930.583651
      931.883160
      932.616940
      933.805409
      937.826233
      939.132280
      940.907084
      954.574478
      955.256126
      956.912222
      957.493572
      966.827490
      967.326138
      967.731664
      968.389268
      970.554216
      971.081929
      978.978720
      979.176376
      985.843731
      986.003400
      987.230520
      987.478140
      988.255772
      988.876657
      990.781131
      991.097989
      991.784589
      992.429459
      995.777363
      995.999930
      996.714014
      996.829706
     1004.852137
     1005.025381
     1007.586696
     1007.805632
     1011.342306
     1011.463935
     1015.837296
     1016.825590
     1016.960252
     1018.253927
     1018.462666
     1018.825985
     1023.036675
     1023.320567
     1024.024020
     1024.084964
     1027.211525
     1027.938344
     1036.859402
     1044.832575
     1044.901713
     1045.800681
     1050.982711
     1051.739364
     1060.869775
     1061.823705
     1064.765671
     1065.166103
     1070.382207
     1071.182081
     1071.871208
     1072.456245
     1072.952723
     1074.756517
     1077.004381
     1077.073226
     1078.544183
     1079.754892
     1080.499657
     1080.871514
     1083.622069
     1083.859085
     1085.745104
     1086.472458
     1087.148163
     1087.913315
     1094.191114
     1094.387206
     1097.869563
     1099.666430
     1103.330823
     1103.785167
     1106.469139
     1106.991540
     1112.463948
     1112.657981
     1114.970007
     1117.648051
     1131.981033
     1132.072997
     1133.750691
     1134.365638
     1141.046104
     1141.102632
     1147.036301
     1147.668039
     1149.674434
     1149.770817
     1150.664132
     1150.780232
     1158.330055
     1159.580774
     1163.293874
     1164.504005
     1168.387939
     1168.577808
     1173.093495
     1173.244762
     1173.709513
     1173.844480
     1174.851875
     1175.131053
     1176.702263
     1177.751844
     1177.811352
     1178.502170
     1180.632808
     1181.126962
     1188.354988
     1188.583079
     1190.151735
     1190.278261
     1191.289319
     1191.396310
     1192.080716
     1193.861832
     1197.495083
     1198.150007
     1206.381600
     1206.566019
     1222.777189
     1223.177469
     1224.935526
     1228.842789
     1228.907908
     1229.579041
     1232.667124
     1233.168420
     1237.200206
     1240.824486
     1242.796478
     1245.503793
     1266.926835
     1268.763620
     1277.819229
     1277.862928
     1281.648414
     1281.783473
     1282.505183
     1282.567873
     1283.731850
     1283.818021
     1285.165898
     1285.350676
     1290.619771
     1290.883715
     1294.279046
     1294.476521
     1294.990514
     1295.052810
     1314.943961
     1317.260512
     1320.169724
     1320.887208
     1321.334322
     1321.778044
     1332.374327
     1334.100858
     1339.192762
     1339.470638
     1339.788596
     1340.577307
     1348.984792
     1350.091648
     1350.553137
     1351.034661
     1352.281648
     1352.593820
     1353.362685
     1353.433335
     1355.721553
     1355.934942
     1358.112379
     1358.348316
     1382.323722
     1382.430183
     1383.896459
     1384.009131
     1390.011276
     1390.527560
     1391.127391
     1391.739538
     1396.952762
     1397.941503
     1399.151124
     1399.773046
     1426.140826
     1426.297925
     1427.915983
     1428.289356
     1428.584108
     1428.784137
     1430.589461
     1431.268776
     1432.374481
     1432.939553
     1435.700752
     1435.776309
     1437.224148
     1438.875324
     1439.440052
     1439.845420
     1441.074607
     1441.210781
     1441.442856
     1441.671479
     1442.468190
     1442.859975
     1443.017668
     1444.070713
     1444.488970
     1445.110864
     1446.505893
     1447.273136
     1447.689865
     1448.824670
     1450.862515
     1450.888832
     1451.475322
     1452.173779
     1453.123523
     1453.212706
     1454.303741
     1454.856586
     1454.924841
     1454.997111
     1455.380825
     1456.034501
     1456.543483
     1456.808105
     1457.350527
     1458.046110
     1459.726703
     1459.971652
     1460.558059
     1461.123200
     1461.486992
     1462.552287
     1463.026322
     1465.473547
     1468.981353
     1469.614299
     1469.935320
     1471.267640
     1473.333931
     1473.472192
     1476.353622
     1476.980043
     1477.832881
     1478.418486
     1480.762587
     1483.160706
     1494.417650
     1494.615342
     1502.254972
     1502.647226
     1503.798874
     1503.858526
     1515.994919
     1516.335860
     1523.149044
     1524.484207
     1525.479609
     1525.731358
     1566.268636
     1566.983754
     1569.231554
     1569.309678
     1570.122082
     1570.457298
     1595.953887
     1595.994840
     1598.537513
     1598.889933
     1599.023287
     1600.656561
     2975.925092
     2975.984673
     2976.116641
     2976.262647
     2976.691740
     2978.039577
     2978.316740
     2978.507230
     2982.347909
     2982.636332
     2983.100099
     2984.967636
     2985.177526
     2985.947674
     2986.438101
     2986.562584
     2988.166631
     2988.774327
     2990.087895
     2990.350471
     2991.332941
     2991.483792
     2991.742843
     2991.966106
     2992.593097
     2993.481084
     2998.785295
     2998.914563
     3000.728994
     3000.930351
     3028.009306
     3029.121467
     3030.524414
     3032.315129
     3034.025640
     3034.645828
     3040.269891
     3041.039948
     3041.175844
     3041.348731
     3042.824195
     3043.057344
     3046.518273
     3046.659210
     3050.382865
     3051.077340
     3051.259856
     3052.506668
     3057.409617
     3057.770652
     3060.293898
     3060.347540
     3069.003411
     3069.063036
     3072.051883
     3072.179162
     3074.997497
     3075.028510
     3084.041728
     3084.219359
     3105.695774
     3105.993439
     3116.628058
     3116.812566
     3117.143790
     3117.195760
     3118.625382
     3118.648787
     3119.569622
     3120.220224
     3123.124426
     3123.203471
     3125.986939
     3126.027078
     3139.783192
     3139.909560
     3142.134224
     3142.226005
     3151.830166
     3151.918792
     3154.763750
     3154.917844
     3155.946680
     3156.169566
     3157.926208
     3157.985501
     3159.052752
     3159.277701
     3164.428150
     3164.670607
     3164.903245
     3165.026482
     3170.856818
     3171.325207
     3172.118942
     3172.363532
     3179.180158
     3179.901982
     3188.872664
     3189.224695
     3193.569561
     3193.624225
     3196.948840
     3198.925644
     3201.233803
     3201.517484
     3202.122505
     3202.424362
     3212.059459
     3213.902494
     3214.249405
     3216.119415
     3216.743636
     3216.798703
